# Supplementary material for: COAP/Pd-catalyzed asymmetric linear allylic alkylation for synthesizing chiral 3,3′-disubstituted oxindoles bearing all-carbon quaternary stereocenters and primary allylic alcohol structures
Source: Royal Society of Chemistry journal article supplement (doi:10.1039/d4qo01057d), 2024-01-01
Supplement: d4qo01057d1.pdf [file d4qo01057d1.pdf]

*Supporting Information*

**COAP/Pd-Catalyzed Asymmetric Linear Allylic Alkylation for  
Chiral 3,3'-Disubstituted Oxindoles Bearing All-Carbon Quaternary  
Stereocenters and Primary Allylic Alcohol Structures**

Wen-Kai Liu,<sup>†a</sup> Bai-Lin Wang,<sup>†a</sup> Xing-Yun Sun,<sup>a</sup> Jia-Yu Song,<sup>a</sup> and Xing-Wang Wang<sup>a\*</sup>

<sup>a</sup>Key Laboratory of Organic Synthesis of Jiangsu Province, College of Chemistry, Chemical Engineering and Materials Science, Soochow University, Suzhou 215123, P. R. China

<sup>†</sup>These authors contributed equally to this work

*E-mail:* wangxw@suda.edu.cn

**Contents**

|                                                                          |     |
|--------------------------------------------------------------------------|-----|
| 1. General methods and materials .....                                   | S2  |
| 2. General procedure A for the synthesis of 3-substituted oxindoles..... | S3  |
| 3. Optimization of reaction conditions.....                              | S4  |
| 4. Scale-up synthesis and further transformations of the adducts .....   | S20 |
| 5. Study of the non-linear effect.....                                   | S26 |
| 6. X-Ray data of <b>7</b> .....                                          | S27 |
| 7. NMR spectra .....                                                     | S29 |
| 8. HPLC analysis .....                                                   | S65 |
| 9. References.....                                                       | S85 |

## 1. General methods and materials

Unless otherwise stated, all reactions were carried out under an atmosphere of nitrogen in oven-dried Schlenk tube with magnetic stirring and all reagents were commercially achieved without further purification unless otherwise noted. Some commonly used solvents for asymmetric catalysis were dried with different drying agents through standard methods reported, including of toluene, dichloro methane (DCM), tetrahydrofuran (THF). Flash Chromatography was performed with silica gel (300–400 mesh) from Yantai Chemical Industry Research Institute, P. R. China. Analytical thin-layer chromatography (TLC) was performed with  $0.25 \pm 0.03$  mm coated commercial silica gel plates (GF-254, particle size 0.04–0.05 mm). The  $^1\text{H}$  and  $^{13}\text{C}$  NMR spectra were recorded in  $\text{CDCl}_3$  on Varian Inova (400 MHz and 101 MHz, respectively) spectrometer. Chemical shifts ( $\delta$  ppm) are relative to the resonance of the deuterated solvent as the internal standard ( $\text{CDCl}_3$ ,  $\delta$  7.26 ppm for proton NMR,  $\delta$  77.10 ppm for carbon NMR). The  $^1\text{H}$  NMR data were reported as follows: chemical shift ( $\delta$ , ppm), multiplicity (s = singlet, d = doublet, t = triplet, q = quartet, m = multiplet, dd = doublet of doublets, dt = doublet of triplets, dq = doublet of quartets, td = triplet of doublets, tt = triplet of triplets, qd = quartet of doublets, ddd = doublet of doublet of doublets, dtt = doublet of triplet of triplets, tdd = triplet of doublet of doublets, dddd = doublet of doublet of doublet of doublets, dddt = doublet of doublet of doublet of triplets), coupling constants ( $J$ ) and assignment. The data for  $^{13}\text{C}$  NMR are reported in terms of chemical shift ( $\delta$ , ppm). The IR spectra were recorded on a Varian 1000 FT-IR spectrometer. High-resolution mass spectra (HRMS) for all the compounds were determined on MicroQ-TOF mass spectrometer with ESI resource. High performance liquid chromatography (HPLC) was performed on an Agilent 1200 Series chromatographs using Chiralpak IC columns. The X-ray data were recorded on a Rigaku Mercury CCD/AFC diffractometer. Optical rotations were performed on Rudolph Aupol IV and reported as follows:  $[\alpha]_D^{25}$  (c in g per 100 mL, solvent).

## 2. General procedure A for the synthesis of 3-substituted oxindoles

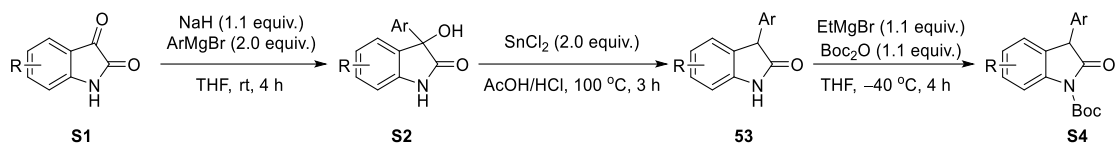

To a solution of **S1** (10 mmol) in dry THF (20 mL), NaH (11.0 mmol, 1.1 equiv.) was added at 0 °C and stirred for 30 min. ArMgBr (10.0 mmol) in ether was then added dropwise to the reaction mixture and allowed to warm to room temperature. Then the reaction mixture was quenched with saturated NH<sub>4</sub>Cl (30 mL) and extracted with ethyl acetate (3×10 mL). The organic phase was washed with brine. The combined organic layers were dried over Na<sub>2</sub>SO<sub>4</sub>. Then the solvents were removed under reduced pressure to afford crude product **S2** as light orange solid.<sup>1</sup>

To a solution of **S2** (10 mmol) in AcOH/HCl (45 mL/3 mL), SnCl<sub>2</sub> (20.0 mmol, 2.0 equiv.) was added at room temperature. Then the mixture was heated to 100 °C for 3 h. Then, the solution was cooled to room temperature, and then diluted with H<sub>2</sub>O (100 mL) and extracted with ethyl acetate (3×20 mL). The organic phase was washed with aqueous sodium hydroxide solution and brine. The combined organic layers were dried over Na<sub>2</sub>SO<sub>4</sub>. Then the solvents were removed under reduced pressure to afford crude product **S3** as yellow solid.<sup>1</sup>

To a solution of **S3** (7.0 mmol) in THF (20.0 mL), EtMgBr (7.7 mmol, 1.1 equiv.) in ether was added dropwise at -40 °C followed by adding (Boc)<sub>2</sub>O (7.7 mmol, 1.1 equiv.) in one portion. The mixture was stirred at the same temperature for 30 min and warmed to room temperature. Then the mixture was diluted with ether and quenched with saturated NH<sub>4</sub>Cl (30.0 mL) and extracted with ethyl acetate (3×10.0 mL). The combined organic layers were washed with brine and dried over Na<sub>2</sub>SO<sub>4</sub>. Purification by flash silica-gel column chromatography using PE/EA (40:1) was carried out to give **S4** as white or yellow solid.<sup>2</sup>

The NMR data of **S4** was reported in the literature.<sup>1,2</sup>

### 3. Optimization of reaction conditions

**Table S1.** Screening of the ligands<sup>[a]</sup>

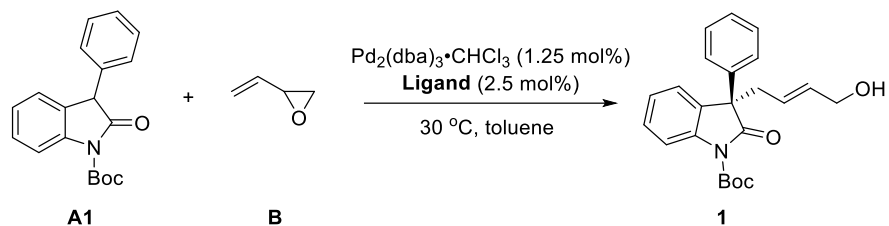

| entry | ligand     | yield (%) <sup>[b]</sup> | ee (%) <sup>[c]</sup> |
|-------|------------|--------------------------|-----------------------|
| 1     | <b>L1</b>  | 81                       | 19                    |
| 2     | <b>L2</b>  | 71                       | 35                    |
| 3     | <b>L3</b>  | 58                       | 49                    |
| 4     | <b>L4</b>  | 69                       | 39                    |
| 5     | <b>L5</b>  | 61                       | 6                     |
| 6     | <b>L6</b>  | 64                       | 12                    |
| 7     | <b>L7</b>  | 56                       | 31                    |
| 8     | <b>L8</b>  | 52                       | 36                    |
| 9     | <b>L9</b>  | 77                       | 47                    |
| 10    | <b>L10</b> | 79                       | 52                    |
| 11    | <b>L11</b> | 81                       | 63                    |
| 12    | <b>L12</b> | 80                       | 60                    |

[a] Unless otherwise noted, reactions were carried out with **A1** (0.10 mmol), **B** (0.10 mmol),  $\text{Pd}_2(\text{dba})_3 \cdot \text{CHCl}_3$  (1.25 mol%) and **Ligand** (2.5 mol%) in the solvent of toluene (1.0 mL) at 30 °C for 12 hours. [b] Isolated yield. [c] Determined by chiral HPLC.

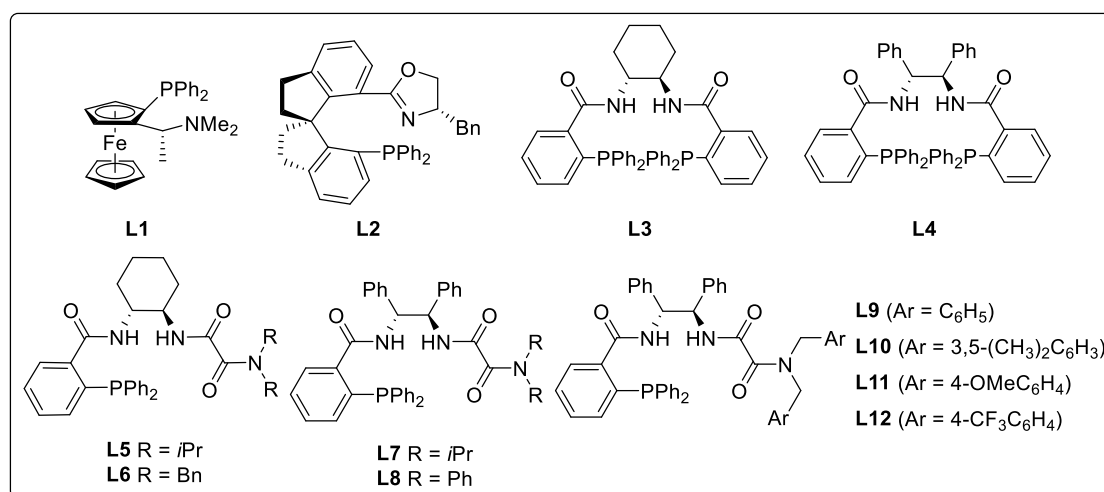

**Scheme S1.** Screening of the ligands



**Table S2.** Screening of the metal sources<sup>[a]</sup>
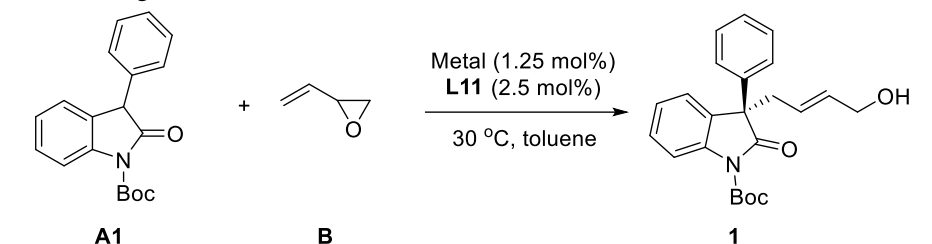

| entry          | metal                                                 | yield (%) <sup>[b]</sup> | <i>ee</i> (%) <sup>[c]</sup> |
|----------------|-------------------------------------------------------|--------------------------|------------------------------|
| 1              | Pd <sub>2</sub> (dba) <sub>3</sub>                    | 75                       | 60                           |
| 2              | Pd <sub>2</sub> (dba) <sub>3</sub> ·CHCl <sub>3</sub> | 81                       | 63                           |
| 3 <sup>d</sup> | Pd(dba) <sub>2</sub>                                  | 72                       | 61                           |
| 4 <sup>d</sup> | Pd[( <i>t</i> Bu) <sub>3</sub> ] <sub>2</sub>         | 60                       | 55                           |
| 5 <sup>d</sup> | Pd(PPh <sub>3</sub> ) <sub>4</sub>                    | 42                       | 0                            |
| 6 <sup>d</sup> | PdCl <sub>2</sub>                                     | N.R.                     | --                           |

[a] Unless otherwise noted, reactions were carried out with **A1** (0.10 mmol), **B** (0.10 mmol), metal source (1.25 mol%) and **L11** (2.5 mol%) in the solvent of toluene (1.0 mL) at 30 °C for 12 hours.

[b] Isolated yield. [c] Determined by chiral HPLC. [d] 2.5 mol% metal source was used.

**Table S3.** Screening of the solvents<sup>[a]</sup>
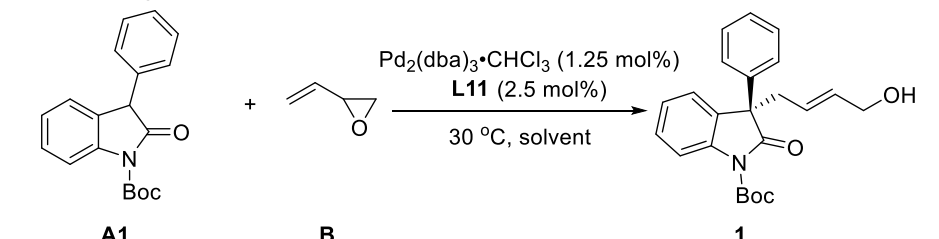

| entry          | solvent            | yield (%) <sup>[b]</sup> | <i>ee</i> (%) <sup>[c]</sup> |
|----------------|--------------------|--------------------------|------------------------------|
| 1              | THF                | 25                       | 63                           |
| 2              | DCM                | 34                       | 27                           |
| 3              | Acetone            | 22                       | 33                           |
| 4              | MeCN               | 18                       | 12                           |
| 5 <sup>e</sup> | MeOH               | 29                       | 15                           |
| 6              | Toluene            | 81                       | 63                           |
| 7              | Mesitylene         | 80                       | 59                           |
| 8              | <i>m</i> -Xylene   | 77                       | 62                           |
| 9              | <i>p</i> -Xylene   | 78                       | 61                           |
| 10             | Fluorobenzene      | 65                       | 60                           |
| 11             | Pentafluorobenzene | 69                       | 34                           |
| 12             | Benzotrifluoride   | 71                       | 58                           |

[a] Unless otherwise noted, reactions were carried out with **A1** (0.10 mmol), **B** (0.10 mmol), Pd<sub>2</sub>(dba)<sub>3</sub>·CHCl<sub>3</sub> (1.25 mol%) and **L11** (2.5 mol%) in the solvent (1.0 mL) at 30 °C for 12 hours.

[b] Isolated yield. [c] Determined by chiral HPLC.

**Table S3.** Screening of the mixed solvents<sup>[a]</sup>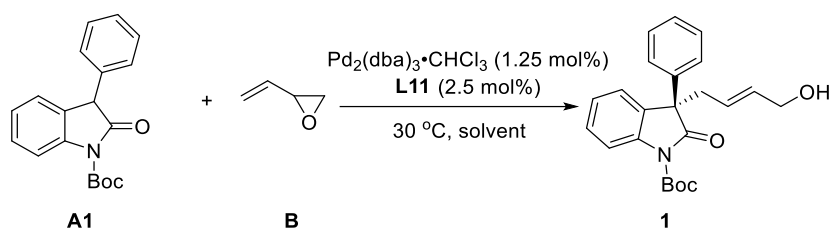

| entry          | solvent                             | yield (%) <sup>[b]</sup> | ee (%) <sup>[c]</sup> |
|----------------|-------------------------------------|--------------------------|-----------------------|
| 1              | toluene/MeOH (v:v = 10:1)           | 90                       | 84                    |
| 2              | toluene/EtOH (v:v = 10:1)           | 84                       | 80                    |
| 3              | toluene/ <i>i</i> PrOH (v:v = 10:1) | 77                       | 79                    |
| 4              | toluene/ <i>t</i> BuOH (v:v = 10:1) | 71                       | 68                    |
| 5 <sup>e</sup> | toluene/MeOH (v:v = 100:1)          | 85                       | 84                    |
| 6              | toluene/MeOH (v:v = 20:1)           | 88                       | 84                    |
| 7              | toluene/MeOH (v:v = 4:1)            | 80                       | 83                    |
| 8              | toluene/MeOH (v:v = 2:1)            | 74                       | 81                    |
| 9              | toluene/MeOH (v:v = 1.5:1)          | 61                       | 77                    |
| 10             | toluene/MeOH (v:v = 1:1)            | 56                       | 76                    |

[a] Unless otherwise noted, reactions were carried out with **A1** (0.10 mmol), **B** (0.10 mmol),  $\text{Pd}_2(\text{dba})_3 \cdot \text{CHCl}_3$  (1.25 mol%) and **L11** (2.5 mol%) in the solvent (1.0 mL) at 30 °C for 12 hours.

[b] Isolated yield. [c] Determined by <sup>1</sup>H NMR analysis. [d] Determined by chiral HPLC.

**Table S4.** Screening of the reaction temperature<sup>[a]</sup>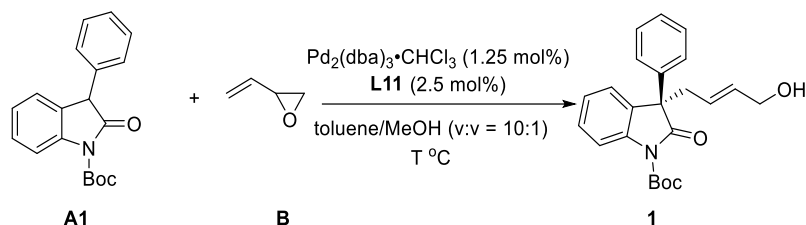

| entry | T (°C) | yield (%) <sup>[b]</sup> | ee (%) <sup>[c]</sup> |
|-------|--------|--------------------------|-----------------------|
| 1     | 30     | 90                       | 84                    |
| 2     | 0      | 91                       | 93                    |
| 3     | -10    | 90                       | 94                    |
| 4     | -20    | 88                       | 94                    |
| 5     | -30    | 87                       | 94                    |
| 6     | -40    | 85                       | 95                    |
| 7     | -50    | 56                       | 90                    |

[a] Unless otherwise noted, reactions were carried out with **A1** (0.10 mmol), **B** (0.10 mmol),  $\text{Pd}_2(\text{dba})_3 \cdot \text{CHCl}_3$  (1.25 mol%) and **L11** (2.5 mol%) in the mixed solvents of toluene/MeOH (v:v =

10:1, 1.0 mL) at T °C for 12 hours. [b] Isolated yield. [c] Determined by chiral HPLC.

## General procedure B for preparation of 1–25

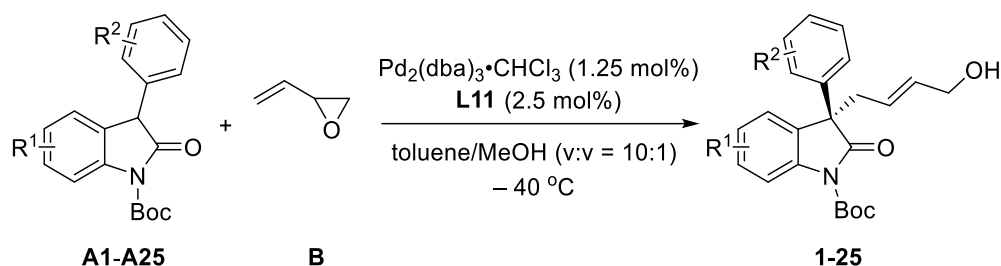

To an oven-dried schlenk tube,  $\text{Pd}_2(\text{dba})_3 \cdot \text{CHCl}_3$  (2.6 mg, 0.0025 mmol) and **L11** (4.2 mg, 0.005 mmol) in dry toluene/MeOH (v:v = 10:1, 2.0 mL) were added under a nitrogen atmosphere. The mixture was stirred for 0.5 hours at room temperature to produce an orange solution. Then 3-substituted oxindoles **A1-A25** (0.20 mmol) and 2-vinyloxirane **B** (0.20 mmol) was added at  $-40\text{ }^\circ\text{C}$ . The mixture was stirred for 4–12 hours at  $-40\text{ }^\circ\text{C}$ . After the reaction was complete (monitored by TLC), it was subjected to silica gel column to afford the desired products **1-25**.

Following the above method, the racemic samples **1-25** were obtained by the use of the  $\text{Pd}(\text{PPh}_3)_4$  (11.56 mg, 0.005 mmol).

### *tert*-Butyl (*R, E*)-3-(4-hydroxybut-2-en-1-yl)-2-oxo-3-phenylindoline-1-carboxylate (**1**)

Following *General Procedure B*, the product **1** was obtained after column chromatography (petroleum ether/EtOAc v:v = 5:1); colorless oil; 85% yield (64.6 mg); 95% *ee* [Daicel Chiralpak

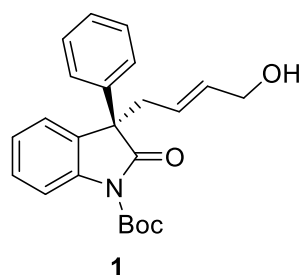

IC, hexane/*i*-propanol = 85/15, flow rate = 1.0 mL/min,  $\lambda = 254.4\text{ nm}$ ,

$t$  (major) = 20.642,  $t$  (minor) = 14.510];  $[\alpha]_D^{25} = +48.0$  (c 0.50,  $\text{CHCl}_3$ );

$^1\text{H NMR}$  (400 MHz,  $\text{CDCl}_3$ )  $\delta$  7.92 (d,  $J = 8.1\text{ Hz}$ , 1H), 7.41 – 7.23

(m, 8H), 5.77 – 5.60 (m, 1H), 5.41 – 5.24 (m, 1H), 3.97 – 3.85 (m, 2H),

3.14 (dd,  $J = 13.8, 8.2\text{ Hz}$ , 1H), 3.08 – 2.95 (m, 1H), 1.63 (s, 9H);  $^{13}\text{C}$

NMR (101 MHz,  $\text{CDCl}_3$ )  $\delta$  176.4, 149.3, 139.8, 139.1, 134.6, 130.4, 128.7, 128.6, 127.7, 127.2,

125.4, 125.2, 124.5, 115.2, 84.6, 63.0, 56.8, 41.1, 28.1; IR (KBr)  $\nu_{\text{max}}$ : 2920, 2851, 1727, 1463, 1345,

1286, 1249, 1144, 752, 694  $\text{cm}^{-1}$ ; HRMS (ESI)  $m/z$ : calcd for  $\text{C}_{23}\text{H}_{25}\text{NNaO}_4^+$  [ $\text{M} + \text{Na}^+$ ] 402.1676,

found 402.1676.

***tert*-Butyl (R, E)-3-(4-hydroxybut-2-en-1-yl)-3-(3-methoxyphenyl)-2-oxoindoline-1-carboxylate (2)**

Following *General Procedure B*, the product **2** was obtained after column chromatography (petroleum ether/EtOAc v:v = 5:1); colorless oil; 61% yield (50.0 mg), 97% *ee* [Daicel Chiralpak

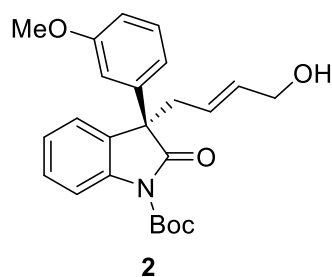

IC, hexane/*i*-propanol = 85/15, flow rate = 1.0 mL/min,  $\lambda$  = 254.4 nm, *t* (major) = 32.202, *t* (minor) = 30.026;  $[\alpha]_D^{25}$  = +70.1 (c 0.50, CHCl<sub>3</sub>); <sup>1</sup>H NMR (400 MHz, CDCl<sub>3</sub>)  $\delta$  7.81 (d, *J* = 8.2 Hz, 1H), 7.27 (ddd, *J* = 8.4, 6.1, 2.8 Hz, 1H), 7.18 – 7.10 (m, 3H), 6.86 – 6.78 (m, 2H), 6.72 (dd, *J* = 8.2, 2.6 Hz, 1H), 5.58 (dt, *J* = 15.4, 5.8 Hz, 1H), 5.22 (ddd, *J* = 15.0, 8.2, 6.5 Hz, 1H), 3.82 (d, *J* = 5.7 Hz, 2H), 3.68 (s, 3H), 3.02 (dd, *J* = 13.6, 8.0 Hz, 1H), 2.95 – 2.86 (m, 1H), 1.53 (s, 9H); <sup>13</sup>C NMR (101 MHz, CDCl<sub>3</sub>)  $\delta$  176.2, 159.7, 149.3, 140.7, 139.8, 134.6, 130.3, 129.6, 128.6, 125.4, 125.2, 124.5, 119.6, 115.1, 113.8, 112.6, 84.5, 63.0, 56.8, 55.2, 41.0, 28.1; IR (KBr)  $\nu_{\text{max}}$ : 2921, 2851, 1760, 1728, 1601, 1463, 1343, 1286, 1247, 1144, 1049, 753 cm<sup>-1</sup>; HRMS (ESI) *m/z*: calcd for C<sub>24</sub>H<sub>27</sub>NNaO<sub>5</sub><sup>+</sup> [*M*+Na<sup>+</sup>] 432.1782, found 432.1780.

***tert*-Butyl (R, E)-3-(4-hydroxybut-2-en-1-yl)-2-oxo-3-(*m*-tolyl)indoline-1-carboxylate (3)**

Following *General Procedure B*, the product **3** was obtained after column chromatography (petroleum ether/EtOAc v:v = 5:1); colorless oil; 69% yield (54.0 mg), 96% *ee* [Daicel Chiralpak

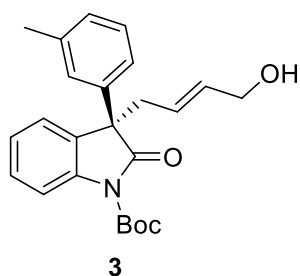

IC, hexane/*i*-propanol = 85/15, flow rate = 1.0 mL/min,  $\lambda$  = 254.4 nm, *t* (major) = 32.202, *t* (minor) = 30.026;  $[\alpha]_D^{25}$  = +56.4 (c 0.50, CHCl<sub>3</sub>); <sup>1</sup>H NMR (400 MHz, CDCl<sub>3</sub>)  $\delta$  7.91 (dt, *J* = 8.2, 0.9 Hz, 1H), 7.38 (ddd, *J* = 8.2, 5.6, 3.3 Hz, 1H), 7.26 – 7.06 (m, 6H), 5.73 – 5.63 (m, 1H), 5.32 (dddd, *J* = 15.9, 7.9, 4.7, 1.5 Hz, 1H), 3.93 (d, *J* = 5.5 Hz, 2H), 3.19 – 3.09 (m, 1H), 3.05 – 2.96 (m, 1H), 2.33 (s, 3H), 1.64 (s, 9H); <sup>13</sup>C NMR (101 MHz, CDCl<sub>3</sub>)  $\delta$  176.4, 149.3, 139.8, 139.0, 138.3, 134.5, 130.6, 128.50, 128.48, 127.9, 125.6, 125.2, 124.4, 124.3, 115.1, 84.5, 63.1, 56.8, 41.0, 28.1, 21.6; IR (KBr)  $\nu_{\text{max}}$ : 3421, 2979, 2920, 1760, 1727, 1463, 1286, 1248, 1144, 969, 752 cm<sup>-1</sup>; HRMS (ESI) *m/z*: calcd for C<sub>24</sub>H<sub>27</sub>NNaO<sub>4</sub><sup>+</sup> [*M*+Na<sup>+</sup>] 416.1833, found 416.1836.

***tert*-Butyl (*R*, *E*)-3-(3-fluorophenyl)-3-(4-hydroxybut-2-en-1-yl)-2-oxoindoline-1-carboxylate**  
**(4)**

Following *General Procedure B*, the product **4** was obtained after column chromatography (petroleum ether/EtOAc v:v = 5:1); colorless oil; 73% yield (58.1 mg); 97% *ee* [Daicel Chiralpak

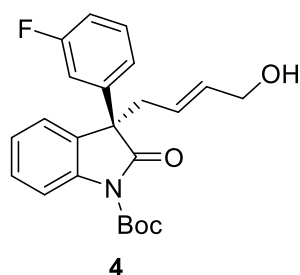

IC, hexane/*i*-propanol = 85/15, flow rate = 1.0 mL/min,  $\lambda$  = 254.4 nm,

t (major) = 15.824, t (minor) = 11.668];  $[\alpha]_D^{25}$  = +47.2 (c 0.50, CHCl<sub>3</sub>);

<sup>1</sup>H NMR (400 MHz, CDCl<sub>3</sub>)  $\delta$  7.90 (dt, *J* = 8.3, 0.9 Hz, 1H), 7.38 (ddd,

*J* = 8.2, 6.6, 2.4 Hz, 1H), 7.32 – 7.27 (m, 1H), 7.26 – 7.19 (m, 2H),

7.12 (ddd, *J* = 7.9, 1.9, 1.0 Hz, 1H), 7.05 (dt, *J* = 10.6, 2.2 Hz, 1H),

6.97 (tdd, *J* = 8.3, 2.5, 0.9 Hz, 1H), 5.67 (dtt, *J* = 15.4, 5.7, 1.2 Hz, 1H), 5.35 – 5.24 (m, 1H), 3.92

(t, *J* = 5.2 Hz, 2H), 3.09 (ddd, *J* = 13.6, 8.1, 1.0 Hz, 1H), 3.02 – 2.93 (m, 1H), 1.62 (s, 9H); <sup>13</sup>C

NMR (101 MHz, CDCl<sub>3</sub>)  $\delta$  175.8, 162.9 (d, *J*<sub>C-F</sub> = 247.5 Hz), 149.1, 141.5 (d, *J*<sub>C-F</sub> = 7.1 Hz), 139.8,

134.8, 130.1 (d, *J*<sub>C-F</sub> = 8.4 Hz), 129.7, 128.8, 125.2, 125.0, 124.6, 123.0 (d, *J*<sub>C-F</sub> = 2.9 Hz), 115.3,

114.8 (d, *J*<sub>C-F</sub> = 5.3 Hz), 114.6 (d, *J*<sub>C-F</sub> = 7.3 Hz), 84.7, 63.1, 56.6, 41.2, 28.1; <sup>19</sup>F NMR (376 MHz,

CDCl<sub>3</sub>)  $\delta$  –112.05; IR (KBr)  $\nu_{\text{max}}$ : 3401, 2930, 1760, 1729, 1463, 1286, 1248, 1144, 970, 752 cm<sup>-1</sup>;

HRMS (ESI) *m/z*: calcd for C<sub>23</sub>H<sub>24</sub>FNNaO<sub>4</sub><sup>+</sup> [M+Na<sup>+</sup>] 420.1582, found 420.1599.

***tert*-Butyl (*R*, *E*)-3-(3-chlorophenyl)-3-(4-hydroxybut-2-en-1-yl)-2-oxoindoline-1-carboxylate**  
**(5)**

Following *General Procedure B*, the product **5** was obtained after column chromatography (petroleum ether/EtOAc v:v = 5:1); colorless oil; 70% yield (58.0 mg); 96% *ee* [Daicel Chiralpak

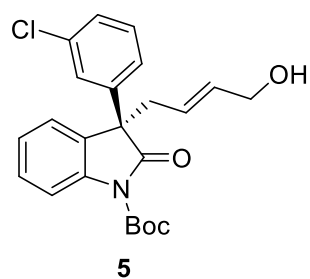

IC, hexane/*i*-propanol = 85/15, flow rate = 1.0 mL/min,  $\lambda$  = 254.4 nm,

t (major) = 15.411, t (minor) = 11.740];  $[\alpha]_D^{25}$  = +45.6 (c 0.50, CHCl<sub>3</sub>);

<sup>1</sup>H NMR (400 MHz, CDCl<sub>3</sub>)  $\delta$  7.90 (dt, *J* = 8.2, 0.8 Hz, 1H), 7.38

(ddd, *J* = 8.2, 7.0, 1.9 Hz, 1H), 7.30 (dt, *J* = 2.6, 1.3 Hz, 1H), 7.28 –

7.25 (m, 1H), 7.23 (ddd, *J* = 10.1, 2.0, 0.8 Hz, 4H), 5.75 – 5.53 (m,

1H), 5.28 (dddt, *J* = 15.8, 8.0, 6.4, 1.5 Hz, 1H), 3.91 (d, *J* = 5.6 Hz, 2H), 3.13 – 3.04 (m, 1H), 3.01

– 2.92 (m, 1H), 1.62 (s, 9H); <sup>13</sup>C NMR (101 MHz, CDCl<sub>3</sub>)  $\delta$  175.8, 149.1, 141.0, 139.8, 134.9,

134.6, 129.9, 129.6, 128.9, 128.0, 127.6, 125.6, 125.1, 124.8, 124.7, 115.3, 84.8, 63.0, 56.6, 41.2,

28.1; IR (KBr)  $\nu_{\text{max}}$ : 3419, 2920, 1764, 1728, 1469, 1332, 1290, 1257, 1146, 1011, 818, 694 cm<sup>-1</sup>;

HRMS (ESI) *m/z*: calcd for C<sub>23</sub>H<sub>24</sub>ClNNaO<sub>4</sub><sup>+</sup> [M+Na<sup>+</sup>] 436.1287, found 436.1308.

***tert*-Butyl (R, E)-3-(4-(dimethylamino)phenyl)-3-(4-hydroxybut-2-en-1-yl)-2-oxoindoline-1-carboxylate (6)**

Following *General Procedure B*, the product **6** was obtained after column chromatography (petroleum ether/EtOAc v:v = 5:1); colorless oil; 74% yield (62.9 mg); 92% *ee* [Daicel Chiralpak

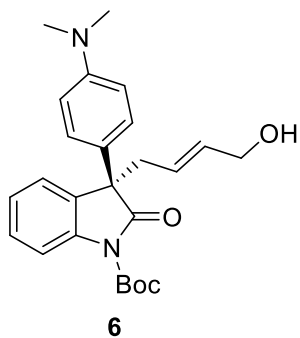

IC, hexane/*i*-propanol = 85/15, flow rate = 1.0 mL/min,  $\lambda$  = 254.4 nm, *t* (major) = 69.095, *t* (minor) = 38.812];  $[\alpha]_D^{25} = +61.2$  (c 0.50, CHCl<sub>3</sub>); <sup>1</sup>H NMR (400 MHz, CDCl<sub>3</sub>)  $\delta$  7.91 (dd, *J* = 8.1, 1.0 Hz, 1H), 7.36 (ddd, *J* = 8.4, 6.7, 2.2 Hz, 1H), 7.26 – 7.15 (m, 4H), 6.71 – 6.63 (m, 2H), 5.74 – 5.58 (m, 1H), 5.40 – 5.24 (m, 1H), 3.95 – 3.83 (m, 2H), 3.14 – 3.06 (m, 1H), 3.01 – 2.95 (m, 1H), 2.93 (s, 6H), 1.63 (s, 9H); <sup>13</sup>C NMR (101 MHz, CDCl<sub>3</sub>)  $\delta$  176.8, 149.9, 149.5, 139.8, 134.2, 130.9, 128.3, 127.9, 126.6, 125.9, 125.2, 124.3, 115.0, 112.5, 84.3, 63.1, 56.0, 41.0, 40.4, 28.1; IR (KBr)  $\nu_{\max}$ : 3432, 2920, 1760, 1725, 1519, 1345, 1286, 1248, 1143, 749 cm<sup>-1</sup>; HRMS (ESI) *m/z*: calcd for C<sub>25</sub>H<sub>30</sub>N<sub>2</sub>NaO<sub>4</sub><sup>+</sup> [M+Na<sup>+</sup>] 445.2098, found 445.2120.

***tert*-Butyl (R, E)-3-(4-hydroxybut-2-en-1-yl)-3-(4-methoxyphenyl)-2-oxoindoline-1-carboxylate (7)**

Following *General Procedure B*, the product **7** was obtained after column chromatography (petroleum ether/EtOAc v:v = 5:1); colorless oil; 71% yield (58.5 mg); 94% *ee* [Daicel Chiralpak

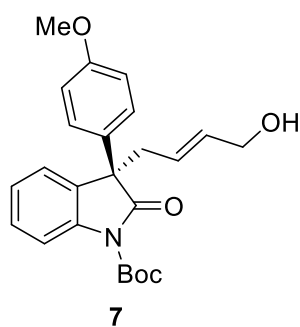

IC, hexane/*i*-propanol = 85/15, flow rate = 1.0 mL/min,  $\lambda$  = 254.4 nm, *t* (major) = 40.474, *t* (minor) = 23.913];  $[\alpha]_D^{25} = +57.2$  (c 0.50, CHCl<sub>3</sub>); <sup>1</sup>H NMR (400 MHz, CDCl<sub>3</sub>)  $\delta$  7.83 (dd, *J* = 13.3, 8.2 Hz, 1H), 7.28 (dq, *J* = 8.5, 4.5, 3.9 Hz, 1H), 7.18 – 7.13 (m, 4H), 6.78 – 6.73 (m, 2H), 5.57 (dt, *J* = 15.4, 5.8 Hz, 1H), 5.31 – 5.12 (m, 1H), 3.82 (d, *J* = 5.8 Hz, 2H), 3.69 (s, 3H), 3.00 (dd, *J* = 13.6, 8.0 Hz, 1H), 2.88 (ddd, *J* = 13.7, 6.4, 1.4 Hz, 1H), 1.53 (s, 9H); <sup>13</sup>C NMR (101 MHz, CDCl<sub>3</sub>)  $\delta$  176.6, 159.1, 149.3, 139.8, 134.5, 131.1, 130.5, 128.5, 128.4, 125.6, 125.2, 124.4, 115.1, 114.0, 84.5, 63.1, 56.2, 55.3, 41.2, 28.1; IR (KBr)  $\nu_{\max}$ : 3420, 2921, 1728, 1463, 1343, 1286, 1247, 1144, 1049, 753 cm<sup>-1</sup>; HRMS (ESI) *m/z*: calcd for C<sub>24</sub>H<sub>27</sub>NNaO<sub>5</sub><sup>+</sup> [M+Na<sup>+</sup>] 432.1782, found 432.1786.

***tert*-Butyl (*R, E*)-3-(4-hydroxybut-2-en-1-yl)-2-oxo-3-(*p*-tolyl)indoline-1-carboxylate (**8**)**

Following *General Procedure B*, the product **8** was obtained after column chromatography (petroleum ether/EtOAc v:v = 5:1); colorless oil; 80% yield (63.3 mg); 91% *ee* [Daicel Chiralpak

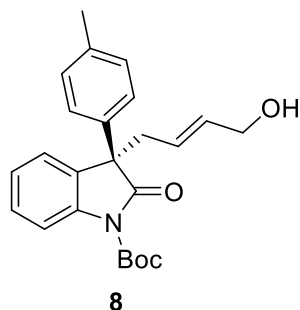

IC, hexane/*i*-propanol = 85/15, flow rate = 1.0 mL/min,  $\lambda$  = 254.4 nm,

$t$  (major) = 27.106,  $t$  (minor) = 16.435];  $[\alpha]_D^{25}$  = +41.1 (c 0.50, CHCl<sub>3</sub>);

<sup>1</sup>H NMR (400 MHz, CDCl<sub>3</sub>)  $\delta$  7.81 (d,  $J$  = 8.2 Hz, 1H), 7.27 (dt,  $J$  =

8.6, 4.5 Hz, 1H), 7.16 – 7.08 (m, 4H), 7.03 (d,  $J$  = 8.1 Hz, 2H), 5.57

(dt,  $J$  = 15.3, 5.7 Hz, 1H), 5.27 – 5.16 (m, 1H), 3.81 (d,  $J$  = 5.7 Hz,

2H), 3.02 (dd,  $J$  = 13.6, 8.0 Hz, 1H), 2.89 (ddd,  $J$  = 13.7, 6.4, 1.4 Hz,

1H), 2.22 (s, 3H), 1.53 (s, 9H); <sup>13</sup>C NMR (101 MHz, CDCl<sub>3</sub>)  $\delta$  176.5, 149.3, 139.8, 137.5, 136.2,

134.5, 130.6, 129.4, 128.5, 127.1, 125.5, 125.2, 124.4, 115.1, 84.5, 63.1, 56.6, 41.0, 28.1, 21.0; IR

(KBr)  $\nu_{\max}$ : 3420, 2920, 1762, 1727, 1463, 1344, 1286, 1249, 1144, 1097, 751 cm<sup>-1</sup>; HRMS (ESI)

$m/z$ : calcd for C<sub>24</sub>H<sub>27</sub>NNaO<sub>4</sub><sup>+</sup> [M+Na<sup>+</sup>] 416.1833, found 416.1833.

***tert*-Butyl (*R, E*)-3-(4-ethylphenyl)-3-(4-hydroxybut-2-en-1-yl)-2-oxoindoline-1-carboxylate (**9**)**

Following *General Procedure B*, the product **9** was obtained after column chromatography (petroleum ether/EtOAc v:v = 5:1); colorless oil; 83% yield (67.8 mg), 95% *ee* [Daicel Chiralpak

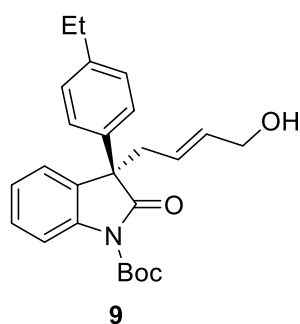

IC, hexane/*i*-propanol = 85/15, flow rate = 1.0 mL/min,  $\lambda$  = 254.4 nm,

$t$  (major) = 25.667,  $t$  (minor) = 15.659];  $[\alpha]_D^{25}$  = +54.2 (c 0.50, CHCl<sub>3</sub>);

<sup>1</sup>H NMR (400 MHz, CDCl<sub>3</sub>)  $\delta$  7.92 (d,  $J$  = 8.2 Hz, 1H), 7.38 (ddd,  $J$  =

8.5, 5.6, 3.4 Hz, 1H), 7.29 – 7.23 (m, 4H), 7.16 (d,  $J$  = 8.0 Hz, 2H),

5.67 (dt,  $J$  = 15.4, 5.8 Hz, 1H), 5.40 – 5.24 (m, 1H), 3.91 (d,  $J$  = 5.7

Hz, 2H), 3.14 (dd,  $J$  = 13.6, 8.1 Hz, 1H), 3.06 – 2.94 (m, 1H), 2.63 (q,

$J$  = 7.6 Hz, 2H), 1.63 (s, 9H), 1.22 (t,  $J$  = 7.6 Hz, 3H); <sup>13</sup>C NMR (101 MHz, CDCl<sub>3</sub>)  $\delta$  176.5, 149.3,

143.7, 139.8, 136.4, 134.5, 130.6, 128.5, 128.2, 127.2, 125.5, 125.2, 124.4, 115.1, 84.5, 63.0, 56.6,

41.1, 28.4, 28.1, 15.4; IR (KBr)  $\nu_{\max}$ : 3462, 2966, 1728, 1463, 1344, 1286, 1248, 1144, 1098, 750

cm<sup>-1</sup>; HRMS (ESI)  $m/z$ : calcd for C<sub>25</sub>H<sub>29</sub>NNaO<sub>4</sub><sup>+</sup> [M+Na<sup>+</sup>] 430.1989, found 430.2017.

***tert*-Butyl (R, E)-3-(4-(*tert*-butyl)phenyl)-3-(4-hydroxybut-2-en-1-yl)-2-oxindoline-1-carboxylate (10)**

Following *General Procedure B*, the product **10** was obtained after column chromatography (petroleum ether/EtOAc v:v = 5:1); colorless oil; 60% yield (51.9 mg); 93% *ee* [Daicel Chiralpak

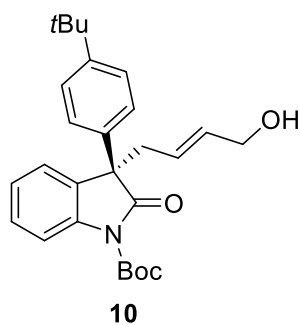

IC, hexane/*i*-propanol = 85/15, flow rate = 1.0 mL/min,  $\lambda$  = 254.4 nm,  $t$  (major) = 19.400,  $t$  (minor) = 12.594];  $[\alpha]_D^{25}$  = +48.6 (c 0.50, CHCl<sub>3</sub>); <sup>1</sup>H NMR (400 MHz, CDCl<sub>3</sub>)  $\delta$  7.81 (d,  $J$  = 8.1 Hz, 1H), 7.26 (dd,  $J$  = 15.7, 7.3 Hz, 3H), 7.20 – 7.11 (m, 4H), 5.57 (dt,  $J$  = 15.4, 5.8 Hz, 1H), 5.22 (dt,  $J$  = 15.0, 7.3 Hz, 1H), 3.80 (d,  $J$  = 5.7 Hz, 2H), 3.05 (dd,  $J$  = 13.6, 8.0 Hz, 1H), 2.90 (dd,  $J$  = 13.7, 6.4 Hz, 1H), 1.53 (s, 9H), 1.20 (s, 9H); <sup>13</sup>C NMR (101 MHz, CDCl<sub>3</sub>)  $\delta$  176.5, 150.5, 149.3, 139.8, 136.1, 134.5, 130.5, 128.5, 126.9, 125.6, 125.5, 125.2, 124.4, 115.1, 84.5, 63.1, 56.6, 41.1, 34.4, 31.3, 28.1; IR (KBr)  $\nu_{\text{max}}$ : 3367, 2961, 1732, 1457, 1344, 1287, 1250, 1147, 1098, 753 cm<sup>-1</sup>; HRMS (ESI)  $m/z$ : calcd for C<sub>27</sub>H<sub>33</sub>NNaO<sub>4</sub><sup>+</sup> [M+Na<sup>+</sup>] 458.2302, found 458.2303.

***tert*-Butyl (R, E)-3-([1,1'-biphenyl]-4-yl)-3-(4-hydroxybut-2-en-1-yl)-2-oxindoline-1-carboxylate (11)**

Following *General Procedure B*, the product **3cf** was obtained after column chromatography (petroleum ether/EtOAc v:v = 5:1); colorless oil; 69% yield (109.1 mg); 91% *ee* [Daicel Chiralpak

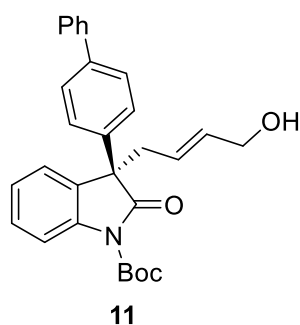

IC, hexane/*i*-propanol = 85/15, flow rate = 1.0 mL/min,  $\lambda$  = 254.4 nm,  $t$  (major) = 35.151,  $t$  (minor) = 22.278];  $[\alpha]_D^{25}$  = +62.4 (c 0.50, CHCl<sub>3</sub>); <sup>1</sup>H NMR (400 MHz, CDCl<sub>3</sub>)  $\delta$  7.95 (d,  $J$  = 8.2 Hz, 1H), 7.57 (dt,  $J$  = 8.5, 2.9 Hz, 4H), 7.49 – 7.33 (m, 6H), 7.29 (d,  $J$  = 2.3 Hz, 2H), 5.71 (dt,  $J$  = 15.4, 5.7 Hz, 1H), 5.48 – 5.22 (m, 1H), 3.95 (d,  $J$  = 5.7 Hz, 2H), 3.19 (dd,  $J$  = 13.6, 8.0 Hz, 1H), 3.07 (dd,  $J$  = 13.7, 6.4 Hz, 1H), 1.65 (s, 9H); <sup>13</sup>C NMR (101 MHz, CDCl<sub>3</sub>)  $\delta$  176.3, 149.3, 140.6, 140.5, 139.9, 138.1, 134.6, 130.3, 128.8, 128.6, 127.7, 127.5, 127.4, 127.1, 125.4, 125.2, 124.5, 115.2, 84.6, 63.1, 56.7, 41.1, 28.1; IR (KBr)  $\nu_{\text{max}}$ : 3434, 2919, 1727, 1463, 1345, 1286, 1249, 1144, 1002, 752 cm<sup>-1</sup>; HRMS (ESI)  $m/z$ : calcd for C<sub>29</sub>H<sub>29</sub>NNaO<sub>4</sub><sup>+</sup> [M+Na<sup>+</sup>] 478.1989, found 478.2002.



***tert*-Butyl (R, E)-3-(4-fluorophenyl)-3-(4-hydroxybut-2-en-1-yl)-2-oxoindoline-1-carboxylate**  
**(12)**

Following *General Procedure B*, the product **12** was obtained after column chromatography

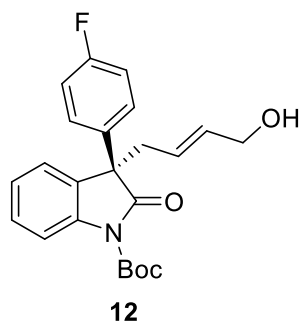

(petroleum ether/EtOAc v:v = 5:1); colorless oil; 61% yield (48.8 mg);

93% *ee* [Daicel Chiralpak IC, hexane/*i*-propanol = 85/15, flow rate =

1.0 mL/min,  $\lambda$  = 254.4 nm, *t* (major) = 19.183, *t* (minor) = 12.412];

$[\alpha]_D^{25}$  = +71.4 (c 0.50, CHCl<sub>3</sub>); <sup>1</sup>H NMR (400 MHz, CDCl<sub>3</sub>)  $\delta$  7.92 (d, *J*

= 8.3 Hz, 1H), 7.39 (ddd, *J* = 8.5, 6.6, 2.4 Hz, 1H), 7.35 – 7.29 (m,

2H), 7.28 – 7.21 (m, 2H), 7.06 – 6.95 (m, 2H), 5.78 – 5.57 (m, 1H),

5.30 (dddt, *J* = 15.8, 8.0, 6.5, 1.5 Hz, 1H), 3.92 (dd, *J* = 5.8, 1.5 Hz, 2H), 3.10 (dd, *J* = 13.8, 8.2 Hz,

1H), 3.03 – 2.93 (m, 1H), 1.63 (s, 9H); <sup>13</sup>C NMR (101 MHz, CDCl<sub>3</sub>)  $\delta$  176.3, 162.2 (d, *J*<sub>C-F</sub> = 248.2p

Hz), 149.2, 139.8, 134.8, 130.0, 129.0 (d, *J*<sub>C-F</sub> = 8.2 Hz), 128.7, 125.1 (d, *J*<sub>C-F</sub> = 12.8 Hz), 124.6,

115.6, 115.3 (d, *J*<sub>C-F</sub> = 13.0 Hz), 84.7, 63.0, 56.2, 41.4, 28.1; <sup>19</sup>F NMR (376 MHz, CDCl<sub>3</sub>)  $\delta$  –114.72;

IR (KBr)  $\nu_{\text{max}}$ : 3420, 2923, 1727, 1478, 1294, 1248, 1141, 818, 719, 694 cm<sup>-1</sup>; HRMS (ESI) *m/z*:

calcd for C<sub>23</sub>H<sub>24</sub>FNNaO<sub>4</sub><sup>+</sup> [M+Na<sup>+</sup>] 420.1582, found 420.1587.

***tert*-Butyl (R, E)-3-(4-chlorophenyl)-3-(4-hydroxybut-2-en-1-yl)-2-oxoindoline-1-carboxylate**  
**(13)**

Following *General Procedure B*, the product **13** was obtained after column chromatography

(petroleum ether/EtOAc v:v = 5:1); colorless oil; 75% yield (62.0 mg); 87% *ee* [Daicel Chiralpak

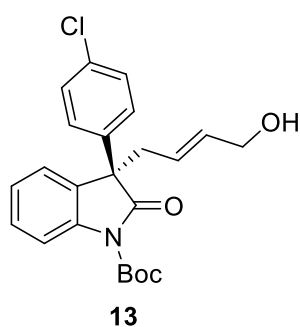

IC, hexane/*i*-propanol = 85/15, flow rate = 1.0 mL/min,  $\lambda$  = 254.4

nm, *t* (major) = 18.380, *t* (minor) = 11.410];  $[\alpha]_D^{25}$  = +64.0 (c 0.50,

CHCl<sub>3</sub>); <sup>1</sup>H NMR (400 MHz, CDCl<sub>3</sub>)  $\delta$  7.92 (dt, *J* = 8.2, 0.8 Hz,

1H), 7.40 (ddd, *J* = 8.2, 7.1, 1.9 Hz, 1H), 7.31 – 7.20 (m, 6H), 5.73

– 5.62 (m, 1H), 5.36 – 5.25 (m, 1H), 3.93 (s, 2H), 3.14 – 3.05 (m,

1H), 3.02 – 2.94 (m, 1H), 1.63 (s, 9H); <sup>13</sup>C NMR (101 MHz, CDCl<sub>3</sub>)

$\delta$  176.0, 149.2, 139.8, 137.5, 134.8, 133.8, 129.8, 128.8, 128.8, 128.7, 125.1, 125.0, 124.6, 115.3,

84.7, 63.0, 56.4, 41.2, 28.1; IR (KBr)  $\nu_{\text{max}}$ : 3435, 2921, 1728, 1468, 1332, 1290, 1257, 1146, 1011,

818, 694 cm<sup>-1</sup>; HRMS (ESI) *m/z*: calcd for C<sub>23</sub>H<sub>24</sub>ClNNaO<sub>4</sub><sup>+</sup> [M+Na<sup>+</sup>] 436.1287, found 436.1287.

***tert*-Butyl (*R*, *E*)-3-(4-bromophenyl)-3-(4-hydroxybut-2-en-1-yl)-2-oxindoline-1-carboxylate (14)**

Following *General Procedure B*, the product **14** was obtained after column chromatography

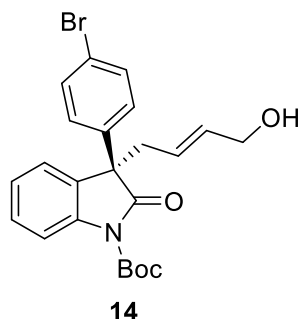

(petroleum ether/EtOAc v:v = 5:1); colorless oil; 60% yield (54.7 mg);

87% *ee* [Daicel Chiralpak IC, hexane/*i*-propanol = 85/15, flow rate =

1.0 mL/min,  $\lambda$  = 254.4 nm, *t* (major) = 19.536, *t* (minor) = 11.871];

$[\alpha]_D^{25}$  = +65.6 (c 0.50, CHCl<sub>3</sub>); <sup>1</sup>H NMR (400 MHz, CDCl<sub>3</sub>)  $\delta$  7.92 (d, *J*

= 8.2 Hz, 1H), 7.48 – 7.33 (m, 3H), 7.29 – 7.19 (m, 4H), 5.74 – 5.60

(m, 1H), 5.37 – 5.22 (m, 1H), 3.93 (d, *J* = 5.6 Hz, 2H), 3.08 (dd, *J* =

13.6, 8.0 Hz, 1H), 2.98 (ddd, *J* = 13.6, 6.5, 1.4 Hz, 1H), 1.63 (s, 9H); <sup>13</sup>C NMR (101 MHz, CDCl<sub>3</sub>)

$\delta$  175.9, 149.2, 139.8, 138.1, 134.9, 131.8, 129.7, 129.1, 128.8, 125.1, 124.9, 124.6, 122.0, 115.3,

84.8, 63.0, 56.4, 41.1, 28.1; IR (KBr)  $\nu_{\text{max}}$ : 3400, 2919, 1728, 1466, 1331, 1291, 1259, 1148, 1015,

816, 694 cm<sup>-1</sup>; HRMS (ESI) *m/z*: calcd for C<sub>23</sub>H<sub>24</sub>BrNNaO<sub>4</sub><sup>+</sup> [M+Na<sup>+</sup>] 480.0781, found 480.0771.

***tert*-Butyl (*R*, *E*)-3-(3,5-dimethylphenyl)-3-(4-hydroxybut-2-en-1-yl)-2-oxindoline-1-carboxylate (15)**

Following *General Procedure B*, the product **15** was obtained after column chromatography

(petroleum ether/EtOAc v:v = 5:1); colorless oil; 92% yield (75.1 mg), 97% *ee* [Daicel Chiralpak

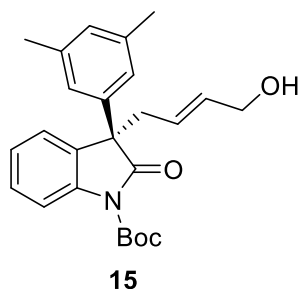

IC, hexane/*i*-propanol = 85/15, flow rate = 1.0 mL/min,  $\lambda$  = 254.4 nm,

*t* (major) = 22.816, *t* (minor) = 12.712];  $[\alpha]_D^{25}$  = +58.4 (c 0.50, CHCl<sub>3</sub>);

<sup>1</sup>H NMR (400 MHz, CDCl<sub>3</sub>)  $\delta$  7.92 (d, *J* = 8.2 Hz, 1H), 7.38 (ddd, *J*

= 8.5, 6.0, 3.0 Hz, 1H), 7.27 – 7.19 (m, 2H), 6.93 (s, 3H), 5.73 – 5.61

(m, 1H), 5.31 (dddd, *J* = 15.2, 8.1, 6.4, 1.4 Hz, 1H), 3.92 (d, *J* = 5.7

Hz, 2H), 3.13 (dd, *J* = 13.6, 8.1 Hz, 1H), 3.00 (ddd, *J* = 13.6, 6.4, 1.4 Hz, 1H), 2.29 (s, 6H), 1.64 (s,

9H); <sup>13</sup>C NMR (101 MHz, CDCl<sub>3</sub>)  $\delta$  176.5, 149.4, 139.8, 139.0, 138.1, 134.4, 130.7, 129.4, 128.4,

125.6, 125.2, 125.0, 124.5, 115.1, 84.5, 63.1, 56.8, 41.0, 28.1, 21.5; IR (KBr)  $\nu_{\text{max}}$ : 3481, 2918, 1727,

1463, 1342, 1286, 1247, 1144, 1001, 750 cm<sup>-1</sup>; HRMS (ESI) *m/z*: calcd for C<sub>25</sub>H<sub>29</sub>NNaO<sub>4</sub><sup>+</sup> [M+Na<sup>+</sup>]

430.1989, found 430.2008.

***tert*-Butyl (*R*, *E*)-3-(4-hydroxybut-2-en-1-yl)-3-(naphthalen-2-yl)-2-oxindoline-1-carboxylate (16)**

Following *General Procedure B*, the product **16** was obtained after column chromatography (petroleum ether/EtOAc v:v = 5:1); colorless oil; 81% yield (81.3 mg), 95% *ee* [Daicel Chiralpak

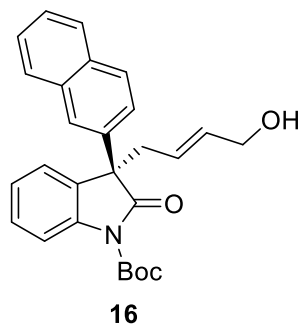

IC, hexane/*i*-propanol = 85/15, flow rate = 1.0 mL/min,  $\lambda$  = 210.8 nm,  $t$  (major) = 31.560,  $t$  (minor) = 19.543;  $[\alpha]_D^{25}$  = +41.6 (c 0.10, CHCl<sub>3</sub>); <sup>1</sup>H NMR (400 MHz, CDCl<sub>3</sub>)  $\delta$  7.85 (d,  $J$  = 8.2 Hz, 1H), 7.72 – 7.61 (m, 4H), 7.43 – 7.30 (m, 4H), 7.17 (dd,  $J$  = 6.1, 4.4 Hz, 2H), 5.68 – 5.52 (m, 1H), 5.35 – 5.17 (m, 1H), 3.81 (d,  $J$  = 5.7 Hz, 2H), 3.13 (dd,  $J$  = 13.6, 8.1 Hz, 1H), 3.02 (ddd,  $J$  = 13.7, 6.3, 1.4 Hz, 1H), 1.52 (s, 9H); <sup>13</sup>C NMR (101 MHz, CDCl<sub>3</sub>)  $\delta$  176.3, 149.3, 139.9, 136.5, 134.7, 133.1, 132.7, 130.5, 128.7, 128.6, 128.2, 127.5, 126.4, 126.3, 125.3, 125.3, 125.1, 124.6, 115.2, 84.6, 63.1, 57.0, 41.0, 28.1; IR (KBr)  $\nu_{\max}$ : 3412, 2922, 1727, 1463, 1344, 1286, 1248, 1144, 1002, 752, 694 cm<sup>-1</sup>; HRMS (ESI)  $m/z$ : calcd for C<sub>27</sub>H<sub>27</sub>NNaO<sub>4</sub><sup>+</sup> [M+Na<sup>+</sup>] 452.1833, found 452.1870.

***tert*-Butyl (*R*, *E*)-3-(4-hydroxybut-2-en-1-yl)-5-methoxy-2-oxo-3-phenylindoline-1-carboxylate (17)**

Following *General Procedure B*, the product **17** was obtained after column chromatography (petroleum ether/EtOAc v:v = 5:1); colorless oil; 81% yield (66.7 mg); 98% *ee* [Daicel Chiralpak

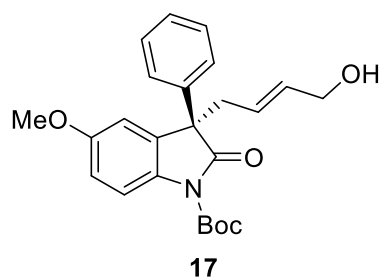

IC, hexane/*i*-propanol = 85/15, flow rate = 1.0 mL/min,  $\lambda$  = 210.8 nm,  $t$  (major) = 30.377,  $t$  (minor) = 20.489;  $[\alpha]_D^{25}$  = +77.2 (c 0.50, CHCl<sub>3</sub>); <sup>1</sup>H NMR (400 MHz, CDCl<sub>3</sub>)  $\delta$  7.84 (d,  $J$  = 8.9 Hz, 1H), 7.36 – 7.27 (m, 5H), 6.90 (dd,  $J$  = 8.9, 2.7 Hz, 1H), 6.79 (d,  $J$  = 2.7 Hz, 1H), 5.79 – 5.61 (m, 1H), 5.41 – 5.22 (m, 1H), 3.92 (d,  $J$  = 5.7 Hz, 2H), 3.81 (s, 3H), 3.12 (dd,  $J$  = 13.7, 8.2 Hz, 1H), 3.01 (ddd,  $J$  = 13.6, 6.1, 1.5 Hz, 1H), 1.62 (s, 9H); <sup>13</sup>C NMR (101 MHz, CDCl<sub>3</sub>)  $\delta$  176.4, 156.8, 149.3, 139.0, 134.7, 133.2, 131.8, 128.7, 127.7, 127.3, 125.3, 116.1, 113.3, 111.4, 84.4, 63.0, 57.2, 55.7, 40.9, 28.1; IR (KBr)  $\nu_{\max}$ : 3446, 2931, 1726, 1614, 1496, 1342, 1294, 1253, 1142, 1018, 841, 695 cm<sup>-1</sup>; HRMS (ESI)  $m/z$ : calcd for C<sub>24</sub>H<sub>27</sub>NNaO<sub>5</sub><sup>+</sup> [M+Na<sup>+</sup>] 432.1782, found 432.1782.

***tert*-Butyl (*R*, *E*)-3-(4-hydroxybut-2-en-1-yl)-5-methyl-2-oxo-3-phenylindoline-1-carboxylate**  
**(18)**

Following *General Procedure B*, the product **18** was obtained after column chromatography (petroleum ether/EtOAc v:v = 5:1); colorless oil; 69% yield (54.0 mg); 98% *ee* [Daicel Chiralpak

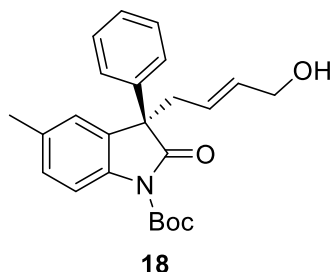

IC, hexane/*i*-propanol = 85/15, flow rate = 1.0 mL/min,  $\lambda$  = 254.4 nm, *t* (major) = 24.520, *t* (minor) = 16.569];  $[\alpha]_D^{25}$  = +64.6 (c 0.50, CHCl<sub>3</sub>); <sup>1</sup>H NMR (400 MHz, CDCl<sub>3</sub>)  $\delta$  7.68 (d, *J* = 8.3 Hz, 1H), 7.27 – 7.17 (m, 5H), 7.08 (ddd, *J* = 8.3, 1.9, 0.8 Hz, 1H), 6.94 (d, *J* = 1.9 Hz, 1H), 5.60 (dt, *J* = 15.4, 5.8, 1.3 Hz, 1H), 5.22 (dddd, *J* = 15.8, 7.9, 6.3, 1.5 Hz, 1H), 3.83 (dd, *J* = 5.7, 1.4 Hz, 2H), 3.11 – 2.99 (m, 1H), 2.95 – 2.81 (m, 1H), 2.28 (s, 3H), 1.53 (s, 9H); <sup>13</sup>C NMR (101 MHz, CDCl<sub>3</sub>)  $\delta$  176.5, 149.3, 139.3, 137.4, 134.5, 134.1, 130.4, 129.1, 128.7, 127.6, 127.3, 125.6, 114.9, 84.4, 63.1, 57.0, 40.9, 28.1, 21.2; IR (KBr)  $\nu_{\max}$ : 3461, 2918, 1727, 1342, 1286, 1247, 1144, 1001, 838, 750 cm<sup>-1</sup>; HRMS (ESI) *m/z*: calcd for C<sub>24</sub>H<sub>27</sub>NNaO<sub>4</sub><sup>+</sup> [*M*+Na<sup>+</sup>] 416.1833, found 416.1832.

***tert*-Butyl (*R*, *E*)-5-fluoro-3-(4-hydroxybut-2-en-1-yl)-2-oxo-3-phenylindoline-1-carboxylate**  
**(19)**

Following *General Procedure B*, the product **19** was obtained after column chromatography (petroleum ether/EtOAc v:v = 5:1); colorless oil; 76% yield (60.7 mg); 96% *ee* [Daicel Chiralpak

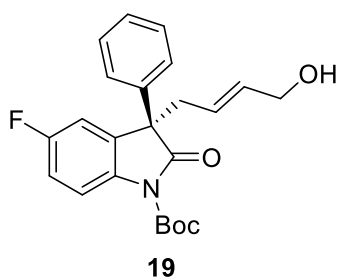

IC, hexane/*i*-propanol = 85/15, flow rate = 1.0 mL/min,  $\lambda$  = 254.4 nm, *t* (major) = 16.382, *t* (minor) = 12.591];  $[\alpha]_D^{25}$  = +51.2 (c 0.50, CHCl<sub>3</sub>); <sup>1</sup>H NMR (400 MHz, CDCl<sub>3</sub>)  $\delta$  7.92 (dd, *J* = 9.0, 4.6 Hz, 1H), 7.33 (qd, *J* = 6.1, 5.2, 2.6 Hz, 5H), 7.08 (td, *J* = 8.9, 2.8 Hz, 1H), 6.96 (dd, *J* = 7.8, 2.8 Hz, 1H), 5.70 (dt, *J* = 15.4, 5.6 Hz, 1H), 5.41 – 5.25 (m, 1H), 3.94 (d, *J* = 5.5 Hz, 2H), 3.13 (dd, *J* = 13.7, 8.1 Hz, 1H), 3.05 – 2.96 (m, 1H), 1.63 (s, 9H); <sup>13</sup>C NMR (101 MHz, CDCl<sub>3</sub>)  $\delta$  175.9, 159.9 (d, *J*<sub>C-F</sub> = 239.9 Hz), 149.2, 138.5, 135.7 (d, *J*<sub>C-F</sub> = 2.2 Hz), 135.0, 132.3 (d, *J*<sub>C-F</sub> = 8.1 Hz), 128.8, 127.9, 127.1, 124.7, 116.5 (d, *J*<sub>C-F</sub> = 7.9 Hz), 115.2 (d, *J*<sub>C-F</sub> = 22.9 Hz), 112.5 (d, *J*<sub>C-F</sub> = 24.4 Hz), 84.8, 62.9, 57.07, 57.05, 40.9, 28.1; <sup>19</sup>F NMR (376 MHz, CDCl<sub>3</sub>)  $\delta$  -117.28; IR (KBr)  $\nu_{\max}$ : 3444, 2922, 1727, 1478, 1294, 1248, 1141, 1001, 818, 718, 694 cm<sup>-1</sup>; HRMS (ESI) *m/z*: calcd for C<sub>23</sub>H<sub>24</sub>FNNaO<sub>4</sub><sup>+</sup> [*M*+Na<sup>+</sup>] 420.1582, found 420.1592.

***tert*-Butyl (*R*, *E*)-5-chloro-3-(4-hydroxybut-2-en-1-yl)-2-oxo-3-phenylindoline-1-carboxylate**  
**(20)**

Following *General Procedure B*, the product **20** was obtained after column chromatography (petroleum ether/EtOAc v:v = 5:1); colorless oil; 59% yield (48.5 mg); 96% *ee* [Daicel Chiralpak

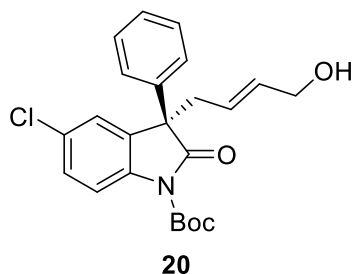

IC, hexane/*i*-propanol = 85/15, flow rate = 1.0 mL/min,  $\lambda$  = 254.4 nm, *t* (major) = 15.673, *t* (minor) = 11.667];  $[\alpha]_D^{25} = +58.1$  (c 0.50, CHCl<sub>3</sub>); <sup>1</sup>H NMR (400 MHz, CDCl<sub>3</sub>)  $\delta$  7.87 (d, *J* = 8.7 Hz, 1H), 7.38 – 7.27 (m, 6H), 7.19 (d, *J* = 2.3 Hz, 1H), 5.75 – 5.62 (m, 1H), 5.37 – 5.24 (m, 1H), 3.93 (d, *J* = 5.5 Hz, 2H), 3.10 (dd, *J* = 13.7, 8.2 Hz, 1H), 2.99 (ddd, *J* = 13.6, 6.3, 1.4 Hz, 1H), 1.60 (s, 9H); <sup>13</sup>C NMR (101 MHz, CDCl<sub>3</sub>)  $\delta$  175.6, 149.1, 138.4, 138.4, 135.1, 132.3, 130.0, 128.9, 128.7, 128.0, 127.1, 125.2, 124.7, 116.5, 84.9, 63.0, 57.0, 40.9, 28.1; IR (KBr)  $\nu_{\max}$ : 3419, 2920, 1728, 1468, 1332, 1290, 1258, 1145, 1011, 818, 694 cm<sup>-1</sup>; HRMS (ESI) *m/z*: calcd for C<sub>23</sub>H<sub>24</sub>ClNNaO<sub>4</sub><sup>+</sup> [*M*+Na<sup>+</sup>] 436.1287, found 436.1282.

***tert*-Butyl (*R*, *E*)-5-bromo-3-(4-hydroxybut-2-en-1-yl)-2-oxo-3-phenylindoline-1-carboxylate**  
**(21)**

Following *General Procedure B*, the product **21** was obtained after column chromatography (petroleum ether/EtOAc v:v = 5:1); colorless oil; 67% yield (61.4 mg); 97% *ee* [Daicel Chiralpak

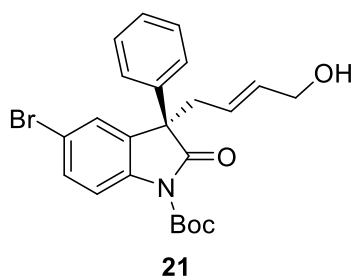

IC, hexane/*i*-propanol = 85/15, flow rate = 1.0 mL/min,  $\lambda$  = 254.4 nm, *t* (major) = 17.553, *t* (minor) = 12.516];  $[\alpha]_D^{25} = +63.0$  (c 0.50, CHCl<sub>3</sub>); <sup>1</sup>H NMR (400 MHz, CDCl<sub>3</sub>)  $\delta$  7.74 (d, *J* = 8.7 Hz, 1H), 7.28 – 7.18 (m, 7H), 5.65 – 5.57 (m, 1H), 5.27 – 5.18 (m, 1H), 3.85 (d, *J* = 5.7 Hz, 2H), 3.02 (dd, *J* = 13.3, 8.4 Hz, 1H), 2.92 (ddt, *J* = 13.6, 6.3, 1.3 Hz, 1H), 1.53 (s, 9H); <sup>13</sup>C NMR (101 MHz, CDCl<sub>3</sub>)  $\delta$  175.5, 149.1, 138.9, 138.4, 135.1, 132.7, 131.6, 128.9, 128.1, 128.0, 127.1, 124.6, 117.5, 116.9, 85.0, 62.9, 56.9, 40.9, 28.1; IR (KBr)  $\nu_{\max}$ : 3412, 2929, 1728, 1466, 1332, 1291, 1258, 1148, 1014, 815, 695 cm<sup>-1</sup>; HRMS (ESI) *m/z*: calcd for C<sub>23</sub>H<sub>24</sub>BrNNaO<sub>4</sub><sup>+</sup> [*M*+Na<sup>+</sup>] 480.0781, found 480.0778.

**tert-Butyl (R, E)-3-(4-hydroxybut-2-en-1-yl)-6-methoxy-2-oxo-3-phenylindoline-1-carboxylate (22)**

Following *General Procedure B*, the product **22** was obtained after column chromatography (petroleum ether/EtOAc v:v = 5:1); colorless oil; 69% yield (56.5 mg); 98% *ee* [Daicel Chiralpak

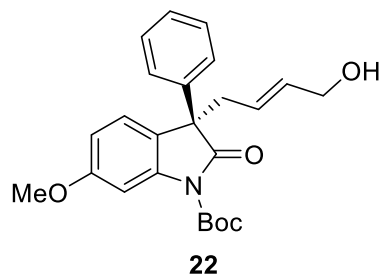

IC, hexane/*i*-propanol = 85/15, flow rate = 1.0 mL/min,  $\lambda$  = 254.4 nm, t (major) = 25.138, t (minor) = 17.488];  $[\alpha]_D^{25} = +70.0$  (c 0.50, CHCl<sub>3</sub>); <sup>1</sup>H NMR (400 MHz, CDCl<sub>3</sub>)  $\delta$  7.56 (d, *J* = 2.4 Hz, 1H), 7.39 – 7.27 (m, 5H), 7.13 (d, *J* = 8.3 Hz, 1H), 6.79 (dd, *J* = 8.4, 2.4 Hz, 1H), 5.75 – 5.62 (m, 1H), 5.39 – 5.27 (m, 1H), 3.94 (d, *J* = 5.7 Hz, 2H), 3.88 (s, 3H), 3.10 (dd, *J* = 13.6, 8.1 Hz, 1H), 3.04 – 2.94 (m, 1H), 1.63 (s, 9H); <sup>13</sup>C NMR (101 MHz, CDCl<sub>3</sub>)  $\delta$  176.8, 159.9, 149.2, 140.8, 139.5, 134.4, 128.6, 127.6, 127.2, 125.8, 125.6, 122.0, 110.2, 101.7, 84.5, 63.1, 56.3, 55.6, 41.2, 28.1; IR (KBr)  $\nu_{\max}$ : 3460, 2931, 1726, 1614, 1496, 1446, 1342, 1294, 1253, 1142, 1018, 841, 803, 720, 695 cm<sup>-1</sup>; HRMS (ESI) *m/z*: calcd for C<sub>24</sub>H<sub>27</sub>NNaO<sub>5</sub><sup>+</sup> [*M*+Na<sup>+</sup>] 432.1782, found 432.1797.

**tert-Butyl (R, E)-6-fluoro-3-(4-hydroxybut-2-en-1-yl)-2-oxo-3-phenylindoline-1-carboxylate (23)**

Following *General Procedure B*, the product **23** was obtained after column chromatography (petroleum ether/EtOAc v:v = 5:1); colorless oil; 72% yield (57.5 mg); 97% *ee* [Daicel Chiralpak

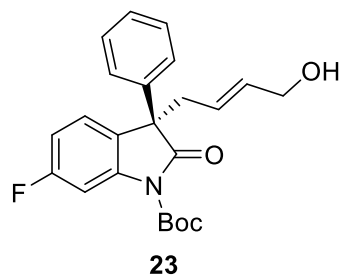

IC, hexane/*i*-propanol = 85/15, flow rate = 1.0 mL/min,  $\lambda$  = 254.4 nm, t (major) = 15.922, t (minor) = 11.917];  $[\alpha]_D^{25} = +77.1$  (c 0.50, CHCl<sub>3</sub>); <sup>1</sup>H NMR (400 MHz, CDCl<sub>3</sub>)  $\delta$  7.62 (dd, *J* = 10.2, 2.4 Hz, 1H), 7.28 – 7.19 (m, 5H), 7.09 (dd, *J* = 8.4, 5.6 Hz, 1H), 6.85 (td, *J* = 8.6, 2.5 Hz, 1H), 5.58 (dt, *J* = 15.4, 5.7 Hz, 1H), 5.28 – 5.16 (m, 1H), 3.84 (d, *J* = 5.7 Hz, 2H), 3.01 (dd, *J* = 13.7, 8.1 Hz, 1H), 2.96 – 2.86 (m, 1H), 1.53 (s, 9H); <sup>13</sup>C NMR (101 MHz, CDCl<sub>3</sub>)  $\delta$  176.1, 162.6 (d, *J*<sub>C-F</sub> = 245.8 Hz), 149.0, 140.8 (d, *J*<sub>C-F</sub> = 12.4 Hz), 138.8, 134.8, 128.8, 127.9, 127.2, 126.2 (d, *J*<sub>C-F</sub> = 9.6 Hz), 125.7 (d, *J*<sub>C-F</sub> = 3.0 Hz), 125.0, 111.2 (d, *J*<sub>C-F</sub> = 22.7 Hz), 103.9 (d, *J*<sub>C-F</sub> = 29.6 Hz), 85.0, 63.0, 56.5, 41.1, 28.0; <sup>19</sup>F NMR (376 MHz, CDCl<sub>3</sub>)  $\delta$  -110.80; IR (KBr)  $\nu_{\max}$ : 3482, 2924, 1728, 1478, 1344, 1294, 1248, 1141, 818, 719, 695 cm<sup>-1</sup>; HRMS (ESI) *m/z*: calcd for C<sub>23</sub>H<sub>24</sub>FNNaO<sub>4</sub><sup>+</sup> [*M*+Na<sup>+</sup>] 420.1582, found 420.1582.

***tert*-Butyl (*R*, *E*)-6-chloro-3-(4-hydroxybut-2-en-1-yl)-2-oxo-3-phenylindoline-1-carboxylate**  
**(24)**

Following *General Procedure B*, the product **24** was obtained after column chromatography (petroleum ether/EtOAc v:v = 5:1); colorless oil; 83% yield (68.9 mg); 97% *ee* [Daicel Chiralpak

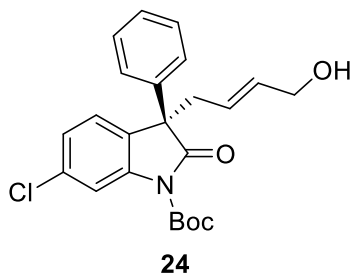

IC, hexane/*i*-propanol = 85/15, flow rate = 1.0 mL/min,  $\lambda$  = 254.4 nm,  $t$  (major) = 13.964,  $t$  (minor) = 11.498];  $[\alpha]_D^{25}$  = +62.5 (c 0.50, CHCl<sub>3</sub>); <sup>1</sup>H NMR (400 MHz, CDCl<sub>3</sub>)  $\delta$  8.01 (d,  $J$  = 1.9 Hz, 1H), 7.38 – 7.29 (m, 5H), 7.24 (dd,  $J$  = 8.0, 1.9 Hz, 1H), 7.17 (d,  $J$  = 8.1 Hz, 1H), 5.75 – 5.63 (m, 1H), 5.33 (dddd,  $J$  = 15.8, 7.9, 6.4, 1.5 Hz, 1H), 3.96 (dd,  $J$  = 5.6, 1.4 Hz, 2H), 3.16 – 3.07 (m, 1H), 3.06 – 2.97 (m, 1H), 1.63 (s, 9H); <sup>13</sup>C NMR (101 MHz, CDCl<sub>3</sub>)  $\delta$  175.8, 149.0, 140.7, 138.6, 134.9, 134.3, 128.8, 128.7, 127.9, 127.1, 126.1, 124.9, 124.6, 116.0, 85.1, 63.0, 56.6, 41.0, 28.0; IR (KBr)  $\nu_{\max}$ : 3421, 2920, 1728, 1468, 1332, 1290, 1257, 1145, 1011, 818, 694 cm<sup>-1</sup>; HRMS (ESI)  $m/z$ : calcd for C<sub>23</sub>H<sub>24</sub>ClNNaO<sub>4</sub><sup>+</sup> [M+Na<sup>+</sup>] 436.1287, found 436.1304.

***tert*-Butyl (*R*, *E*)-6-bromo-3-(4-hydroxybut-2-en-1-yl)-2-oxo-3-phenylindoline-1-carboxylate**  
**(25)**

Following *General Procedure B*, the product **25** was obtained after column chromatography (petroleum ether/EtOAc v:v = 5:1); colorless oil; 55% yield (50.7 mg); 97% *ee* [Daicel Chiralpak

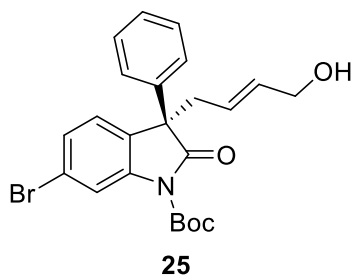

IC, hexane/*i*-propanol = 85/15, flow rate = 1.0 mL/min,  $\lambda$  = 254.4 nm,  $t$  (major) = 13.888,  $t$  (minor) = 11.700];  $[\alpha]_D^{25}$  = +52.2 (c 0.50, CHCl<sub>3</sub>); <sup>1</sup>H NMR (400 MHz, CDCl<sub>3</sub>)  $\delta$  8.17 (d,  $J$  = 1.8 Hz, 1H), 7.39 (dd,  $J$  = 8.0, 1.8 Hz, 1H), 7.36 – 7.29 (m, 5H), 7.11 (d,  $J$  = 8.0 Hz, 1H), 5.75 – 5.63 (m, 1H), 5.39 – 5.26 (m, 1H), 3.96 (d,  $J$  = 5.6 Hz, 2H), 3.11 (dd,  $J$  = 13.7, 8.1 Hz, 1H), 3.02 (ddd,  $J$  = 13.7, 6.4, 1.4 Hz, 1H), 1.63 (s, 9H); <sup>13</sup>C NMR (101 MHz, CDCl<sub>3</sub>)  $\delta$  175.7, 149.0, 140.8, 138.5, 134.9, 129.3, 128.8, 127.9, 127.5, 127.1, 126.4, 124.8, 122.2, 118.7, 85.1, 63.0, 56.6, 40.9, 28.0; IR (KBr)  $\nu_{\max}$ : 3388, 2918, 1728, 1466, 1332, 1290, 1258, 1148, 1016, 816, 694 cm<sup>-1</sup>; HRMS (ESI)  $m/z$ : calcd for C<sub>23</sub>H<sub>24</sub>BrNNaO<sub>4</sub><sup>+</sup> [M+Na<sup>+</sup>] 480.0781, found 480.0780.

## 4. Scale-up synthesis and further transformations of the adducts

### 4.1 Gram scale synthesis of 3af

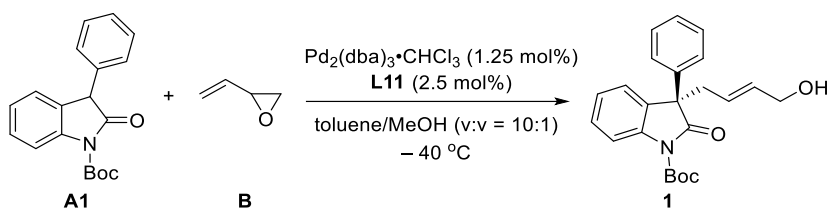

To an oven-dried 50 mL schlenk flask,  $\text{Pd}_2(\text{dba})_3 \cdot \text{CHCl}_3$  (64 mg, 0.0625 mmol, 1.25 mol%) and **L11** (101.5 mg, 0.125 mmol, 2.5 mol%) in dry toluene/MeOH (v:v = 10:1, 20 mL) were added under a nitrogen atmosphere. The mixture was stirred for 1.0 hour at room temperature to produce an orange solution. Then 3-substituted oxindoles **A1** (1.90 g, 5 mmol) and 2-vinyloxirane **B** (0.35 g, 5 mmol) was added at  $-40\text{ }^\circ\text{C}$ . Afterwards, the solution was stirred at  $-40\text{ }^\circ\text{C}$  for 12.0 hours. At last, it was subjected to silica gel column (PE/EA v:v = 5:1) to afford **1** as colorless oil in 82% yield (1.55 g) with 95% *ee*.

### 4.2 Further transformation of the adduct 1

To an oven-dried schlenk tube, **1** (0.2 mmol, 1.0 equiv.) and the solvent of THF (1.0 mL) were added. Then  $\text{LiAlH}_4$  (1.0 mmol, 5.0 equiv.) was added under  $0\text{ }^\circ\text{C}$ . The reaction mixture was stirred at  $60\text{ }^\circ\text{C}$  under  $\text{N}_2$  atmosphere for 12 hours. After the reaction completed, NaOH (1M, 2.0 mL) was added to quench the reaction and the water layer was extracted with EtOAc (2.0 mL $\times$ 3). The combined organic layer was washed with brine (2.0 mL), dried over  $\text{Na}_2\text{SO}_4$ , filtered and concentrated under reduced pressure. The crude product was purified by flash column chromatography on silica gel using PE/EA (2/1) as the eluent to give the product **26** in 84 % yield.

#### (*R, E*)-4-(1-Methyl-3-phenylindolin-3-yl)but-2-en-1-ol (**26**)

The product **26** was obtained after column chromatography (petroleum ether/EtOAc v:v = 5:1);

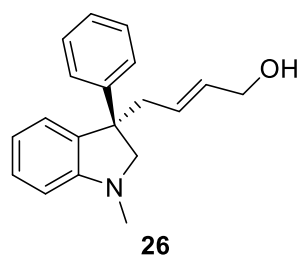

colorless oil; 84% yield (46.8 mg), 93% *ee* [Daicel Chiralpak AD, hexane/*i*-propanol = 85/15, flow rate = 1.0 mL/min,  $\lambda = 254.4\text{ nm}$ ,  $t$  (major) = 9.644,  $t$  (minor) = 10.649];  $[\alpha] = +93.4$  (c 0.03,  $\text{CHCl}_3$ );  $^1\text{H}$  NMR (400 MHz,  $\text{CDCl}_3$ )  $\delta$  7.37 – 7.26 (m, 4H), 7.22 – 7.12 (m, 2H), 7.03 (dd,  $J = 7.4, 1.3\text{ Hz}$ , 1H), 6.72 (td,  $J = 7.4, 1.0\text{ Hz}$ , 1H), 6.54 (d,  $J = 7.9\text{ Hz}$ , 1H), 5.68 – 5.47 (m, 2H), 4.01 – 3.90 (m, 2H), 3.49 (d,  $J = 9.0\text{ Hz}$ , 1H), 3.40 (d,  $J = 9.0$



Hz, 1H), 2.92 – 2.79 (m, 2H), 2.76 (s, 3H); <sup>13</sup>C NMR (101 MHz, CDCl<sub>3</sub>) δ 152.9, 145.7, 134.9, 132.3, 129.0, 128.3, 128.1, 126.9, 126.4, 124.8, 117.8, 107.8, 69.2, 63.5, 52.0, 41.7, 36.0; IR (KBr) ν<sub>max</sub>: 3360, 2921, 1735, 1603, 1488, 1466, 1242, 967, 741, 697 cm<sup>-1</sup>; HRMS (ESI) m/z: calcd for C<sub>19</sub>H<sub>22</sub>NO<sup>+</sup> [M+H<sup>+</sup>] 280.1696, found 280.1701.

To an oven-dried schlenk tube, **1** (0.2 mmol) and Pd/C (0.20 mmol, wt 10%) were added. Then the solvent of MeOH (1.0 mL) was added. The reaction mixture was stirred at room temperature under H<sub>2</sub> atmosphere for 12 hours. It was filtered. The filtrate was concentrated and purified by column chromatography on silica gel using PE/EA (2/1) as the eluent to give the product **27** in 82 % yield.

**tert-Butyl (R)-3-(4-hydroxybutyl)-2-oxo-3-phenylindoline-1-carboxylate (27)**

The product **27** was obtained after column chromatography (petroleum ether/EtOAc v:v = 5:1);

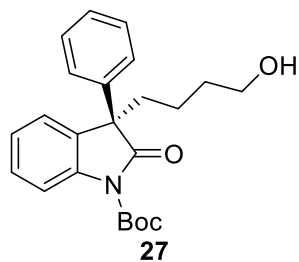

colorless oil; 82% yield (62.4 mg), 92% *ee* [Daicel Chiralpak IC,

hexane/*i*-propanol = 95/5, flow rate = 1.0 mL/min, λ = 254.4 nm, t

(major) = 9.070, t (minor) = 8.101]; [α] = +96.7 (c 0.05, CHCl<sub>3</sub>); <sup>1</sup>H

NMR (400 MHz, CDCl<sub>3</sub>) δ 7.94 (d, *J* = 8.2 Hz, 1H), 7.42 – 7.27 (m,

5H), 7.26 – 7.16 (m, 3H), 2.47 (td, *J* = 12.7, 4.3 Hz, 1H), 2.16 (td, *J* =

12.8, 4.1 Hz, 1H), 1.62 (s, 9H), 1.33 – 1.24 (m, 2H), 1.19 – 1.06 (m, 1H), 0.90 (tdd, *J* = 12.4, 6.1,

3.3 Hz, 1H), 0.82 (d, *J* = 7.2 Hz, 2H); <sup>13</sup>C NMR (101 MHz, CDCl<sub>3</sub>) δ 177.0, 149.4, 140.2, 140.1,

131.1, 128.6, 128.3, 127.5, 127.1, 124.8, 124.5, 115.2, 84.3, 57.0, 38.4, 28.1, 26.7, 22.9, 13.8; IR

(KBr) ν<sub>max</sub>: 2957, 1763, 1727, 1463, 1346, 1286, 1246, 1146, 752, 719, 694 cm<sup>-1</sup>; HRMS (ESI) m/z:

calcd for C<sub>23</sub>H<sub>27</sub>NNaO<sub>4</sub><sup>+</sup> [M+Na<sup>+</sup>] 404.1833, found 404.1833.

To an oven-dried schlenk tube, **1** (0.2 mmol, 1.0 equiv.) and the solvent of MeOH (1.0 mL) were added. Then NaOMe (0.06 mmol, 0.3 equiv.) were added. The reaction mixture was stirred at room temperature under N<sub>2</sub> atmosphere for 1 hour. After the reaction completed, NH<sub>4</sub>Cl (1M, 2.0 mL) was added to quench the reaction and the water layer was extracted with EtOAc (2.0 mL×3). The combined organic layer was washed with brine (2.0 mL), dried over Na<sub>2</sub>SO<sub>4</sub>, filtered and concentrated under reduced pressure. The crude product was purified by flash column chromatography on silica gel using PE/EA (2/1) as the eluent to give the product **28** in 82 % yield.

**(*R, E*)-3-(4-Hydroxybut-2-en-1-yl)-3-phenylindolin-2-one (28)**

The product **28** was obtained after column chromatography (petroleum ether/EtOAc v:v = 2:1);

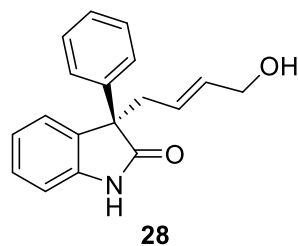

**28**

colorless oil; 82% yield (45.8 mg), 94% *ee* [Daicel Chiralpak IC,

hexane/*i*-propanol = 70/30, flow rate = 1.0 mL/min,  $\lambda$  = 254.4 nm, t

(major) = 12.247, t (minor) = 17.416];  $[\alpha]_D^{25} = +27.0$  (c 0.50, CHCl<sub>3</sub>); <sup>1</sup>H

NMR (400 MHz, CDCl<sub>3</sub>)  $\delta$  8.95 (s, 1H), 7.42 – 7.21 (m, 7H), 7.14 –

7.04 (m, 1H), 6.94 (d, *J* = 7.7 Hz, 1H), 5.71 (dt, *J* = 15.4, 5.7 Hz, 1H),

5.40 – 5.21 (m, 1H), 3.89 (d, *J* = 5.6 Hz, 2H), 3.14 (dd, *J* = 13.5, 8.2 Hz, 1H), 3.05 – 2.92 (m, 1H);

<sup>13</sup>C NMR (101 MHz, CDCl<sub>3</sub>)  $\delta$  180.7, 141.0, 139.4, 134.2, 132.5, 128.7, 128.3, 127.5, 126.9, 125.6,

125.2, 122.6, 110.2, 63.0, 57.2, 40.0; IR (KBr)  $\nu_{\text{max}}$ : 3217, 2921, 1698, 1617, 1470, 1326, 1215,

968, 747, 694, 659 cm<sup>-1</sup>; HRMS (ESI) *m/z*: calcd for C<sub>18</sub>H<sub>17</sub>NNaO<sub>2</sub><sup>+</sup> [*M*+Na<sup>+</sup>] 302.1152, found

302.1153.

To an oven-dried schlenk tube, **1** (0.2 mmol, 1.0 equiv.) and HBr (48% w.t.) were added. The reaction mixture was stirred at room temperature for 3 hours. After the reaction completed, saturated NaHCO<sub>3</sub> solution (2.0 mL) was added to quench the reaction and the water layer was extracted with EtOAc (2.0 mL×3). The combined organic layer was washed with brine (2.0 mL), dried over Na<sub>2</sub>SO<sub>4</sub>, filtered and concentrated under reduced pressure. The crude product was purified by flash column chromatography on silica gel using PE/EA (5/1) as the eluent to give the product **29** in 71 % yield.

**(*R, E*)-3-(4-Bromobut-2-en-1-yl)-3-phenylindolin-2-one (29)**

The product **29** was obtained after column chromatography (petroleum ether/EtOAc v:v = 5:1);

colorless oil; 71% yield (48.5mg), 94% *ee* [Daicel Chiralpak IC, hexane/*i*-propanol = 85/15, flow

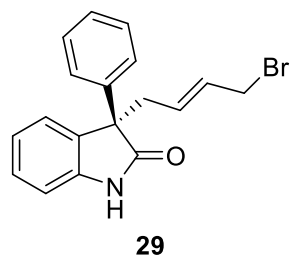

**29**

rate = 1.0 mL/min,  $\lambda$  = 254.4 nm, t (major) = 19.061, t (minor) = 8.952];

$[\alpha]_D^{25} = +51.2$  (c 0.50, CHCl<sub>3</sub>); <sup>1</sup>H NMR (400 MHz, CDCl<sub>3</sub>)  $\delta$  9.04 (s, 1H),

7.46 – 7.27 (m, 6H), 7.22 (d, *J* = 7.4 Hz, 1H), 7.11 (t, *J* = 7.5 Hz, 1H),

6.98 (d, *J* = 7.7 Hz, 1H), 5.76 (dt, *J* = 15.2, 7.7 Hz, 1H), 5.48 (dt, *J* =

14.8, 7.3 Hz, 1H), 3.92 – 3.65 (m, 2H), 3.07 (m, 2H); <sup>13</sup>C NMR (101

MHz, CDCl<sub>3</sub>)  $\delta$  180.5, 141.0, 139.0, 132.0, 131.0, 129.6, 128.7, 128.4, 127.6, 127.0, 125.4, 122.6,

110.4, 56.9, 39.7, 32.4; IR (KBr)  $\nu_{\text{max}}$ : 3205, 1702, 1616, 1469, 1202, 963, 747, 694, 659, 591  $\text{cm}^{-1}$ ; HRMS (ESI)  $m/z$ : calcd for  $\text{C}_{18}\text{H}_{16}\text{BrNNaO}^+$  [ $\text{M}+\text{Na}^+$ ] 364.0308, found 364.0303.

### General procedure C for preparation of 30–34

To a schlenk tube, **29** (0.2 mmol, 1.0 equiv.), amino compound (0.8 mmol, 4.0 equiv) and the solvent of MeCN (1.0 mL) were added. Then  $\text{K}_2\text{CO}_3$  (0.24 mmol, 1.2 equiv.) were added. The reaction mixture was stirred at 60 °C. After the reaction was complete (monitored by TLC), water was added to quench the reaction and the water layer was extracted with EtOAc (2.0 mL $\times$ 3). The combined organic layer was washed with brine (2.0 mL), dried over  $\text{Na}_2\text{SO}_4$ , filtered and concentrated under reduced pressure. it was subjected to silica gel column to afford the desired products **30-34**.

### *tert*-Butyl 2-((*S*)-2-oxo-3-(((*E*)-4-((*R*)-2-oxo-3-phenylindolin-3-yl)but-2-en-1-yl)amino)-2,3,4,5-tetrahydro-1H-benzo[b]azepin-1-yl)acetate (**30**)

Following *General Procedure C*, the product **30** was obtained after column chromatography

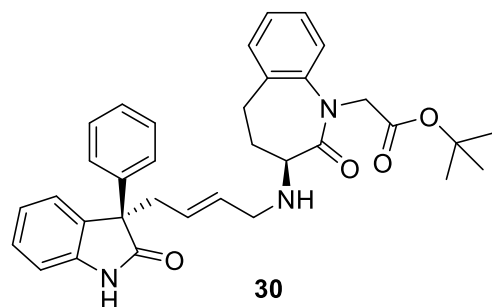

(DCM/MeOH v:v = 20:1); colorless oil; 71% yield

(78.5 mg);  $[\alpha] = -50.7$  (c 0.08,  $\text{CH}_3\text{OH}$ );  $^1\text{H}$  NMR

(400 MHz,  $\text{CD}_3\text{OD}$ )  $\delta$  7.37–7.19 (m, 11H), 7.10 (dd,

$J = 7.5, 1.3$  Hz, 1H), 7.03 (td,  $J = 7.5, 1.0$  Hz, 1H),

6.92 (d,  $J = 7.8$  Hz, 1H), 5.44 (dt,  $J = 14.0, 6.6$  Hz,

1H), 5.25 (dt,  $J = 14.9, 7.1$  Hz, 1H), 4.44 (s, 2H), 3.16

(ddd,  $J = 29.3, 12.4, 7.7$  Hz, 2H), 3.05 (dd,  $J = 13.3, 6.2$  Hz, 1H), 2.97 (dd,  $J = 13.6, 6.4$  Hz, 1H),

2.82 (ddd,  $J = 29.0, 13.5, 7.4$  Hz, 2H), 2.60 (dd,  $J = 13.7, 6.7$  Hz, 1H), 2.27 (tt,  $J = 13.5, 7.4$  Hz,

1H), 1.89 (td,  $J = 12.0, 7.4$  Hz, 1H), 1.42 (s, 9H);  $^{13}\text{C}$  NMR (101 MHz,  $\text{CD}_3\text{OD}$ )  $\delta$  180.8, 172.6,

168.2, 141.5, 140.8, 139.7, 135.5, 132.7, 130.2, 129.2, 128.4, 128.2, 128.0, 127.9, 127.0, 126.9,

126.6, 124.9, 122.3, 122.1, 109.8, 81.8, 57.0, 56.7, 50.9, 39.3, 35.9, 27.7, 26.9; IR (KBr)  $\nu_{\text{max}}$ : 2976,

1715, 1667, 1455, 1365, 1219, 1150, 753, 695  $\text{cm}^{-1}$ ; HRMS (ESI)  $m/z$ : calcd for  $\text{C}_{34}\text{H}_{38}\text{N}_3\text{O}_4^+$

[ $\text{M}+\text{H}^+$ ] 552.2857, found 552.2858.

**(2*S*, 3*R*, 4*R*, 5*S*, 6*R*)-6-(Acetoxymethyl)-3-(bis(*E*)-4-((*R*)-2-oxo-3-phenylindolin-3-yl)but-2-en-1-yl)amino)tetrahydro-2*H*-pyran-2,4,5-triyl triacetate (31)**

Following *General Procedure C*, the product **30** was obtained after column chromatography

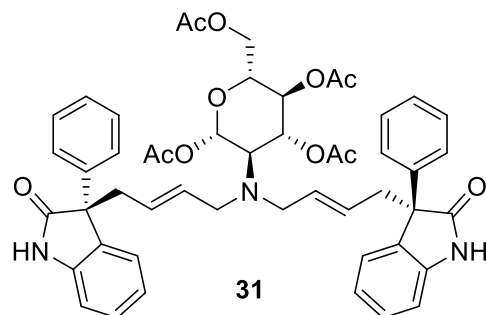

(petroleum ether/EtOAc v:v = 2:1); colorless oil; 49%

yield (85.4 mg);  $[\alpha] = +44.0$  (c 0.05, CHCl<sub>3</sub>); <sup>1</sup>H

NMR (400 MHz, CDCl<sub>3</sub>)  $\delta$  9.80 (s, 2H), 7.37 – 7.20

(m, 10H), 7.15 (td,  $J = 7.7, 1.3$  Hz, 2H), 7.08 (d,  $J =$

7.3 Hz, 2H), 6.98 (td,  $J = 7.5, 1.1$  Hz, 2H), 6.91 (d,  $J =$

7.7 Hz, 2H), 5.38 (d,  $J = 8.8$  Hz, 1H), 5.10 – 4.99

(m, 2H), 4.99 – 4.92 (m, 1H), 4.91 – 4.77 (m, 3H), 4.17 (dd,  $J = 12.4, 4.6$  Hz, 1H), 3.92 (dd,  $J =$

12.3, 2.2 Hz, 1H), 3.53 (dd,  $J = 10.0, 2.4$  Hz, 1H), 3.14 (dd,  $J = 13.0, 7.7$  Hz, 2H), 2.83 (dd,  $J =$

13.0, 6.7 Hz, 2H), 2.72 (dd,  $J = 10.5, 8.8$  Hz, 1H), 2.52 (ddd,  $J = 46.7, 15.3, 5.6$  Hz, 4H), 1.99 –

1.89 (m, 9H), 1.66 (s, 3H); <sup>13</sup>C NMR (101 MHz, CDCl<sub>3</sub>)  $\delta$  180.8, 169.6, 168.7, 168.6, 167.8, 140.2,

138.8, 132.0, 131.3, 127.7, 127.2, 126.5, 125.6, 124.9, 123.7, 121.8, 109.4, 91.5, 71.3, 69.0, 67.8,

62.3, 60.8, 56.8, 49.0, 39.5, 20.2, 19.7, 19.6; IR (KBr)  $\nu_{\text{max}}$ : 2920, 1710, 1471, 1364, 1213, 1031,

799, 660, 485 cm<sup>-1</sup>; HRMS (ESI)  $m/z$ : calcd for C<sub>50</sub>H<sub>52</sub>N<sub>3</sub>O<sub>11</sub><sup>+</sup> [M+H<sup>+</sup>] 870.3597, found 870.3600.

**2-(Diethylamino)ethyl (*R*, *E*)-4-((4-(2-oxo-3-phenylindolin-3-yl)but-2-en-1-yl)amino)benzoate (32)**

Following *General Procedure C*, the product **32** was obtained after column chromatography

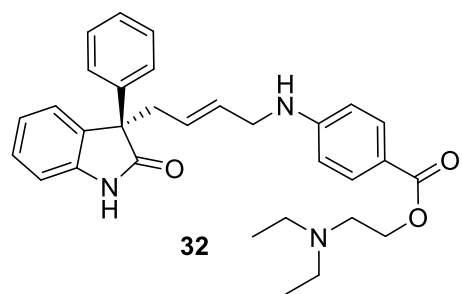

(DCM/MeOH v:v = 20:1); colorless oil; 50% yield (50.0

mg);  $[\alpha] = +16.0$  (c 0.10, CH<sub>3</sub>OH); <sup>1</sup>H NMR (400 MHz,

CD<sub>3</sub>OD)  $\delta$  7.75 – 7.71 (m, 2H), 7.35 – 7.26 (m, 6H),

7.13 – 7.05 (m, 1H), 7.02 (d,  $J = 7.9$  Hz, 1H), 6.65 (ddt,

$J = 12.9, 6.5, 2.3$  Hz, 3H), 5.86 – 5.74 (m, 1H), 5.64 (ddt,

$J = 15.0, 11.8, 7.3$  Hz, 1H), 4.52 (t,  $J = 5.1$  Hz, 1H), 3.80

(dq,  $J = 7.1, 3.6, 2.5$  Hz, 2H), 3.75 (d,  $J = 7.4$  Hz, 1H), 3.35 (s, 1H), 3.24 (dd,  $J = 13.3, 6.5$  Hz, 1H),

3.16 – 2.91 (m, 7H), 1.17 (dt,  $J = 14.1, 5.6$  Hz, 6H); <sup>13</sup>C NMR (101 MHz, CD<sub>3</sub>OD)  $\delta$  180.6, 166.1,

154.1, 141.8, 132.8, 131.4, 131.1, 130.7, 128.4, 127.3, 126.4, 125.0, 122.5, 113.4, 113.0, 57.0, 56.9,

56.5, 55.0, 53.5, 53.3, 39.5, 10.3, 6.5; IR (KBr)  $\nu_{\text{max}}$ : 3204, 1695, 1599, 1469, 1367, 1267, 1170,

1085, 754, 697 cm<sup>-1</sup>; HRMS (ESI)  $m/z$ : calcd for C<sub>31</sub>H<sub>36</sub>N<sub>3</sub>O<sub>3</sub><sup>+</sup> [M+H<sup>+</sup>] 498.2752, found 498.2752.

**(R)-1-((E)-4-((R)-2-oxo-3-Phenylindolin-3-yl)but-2-en-1-yl)pyrrolidine-2-carboxamide (33)**

Following *General Procedure C*, the product **33** was obtained after column chromatography

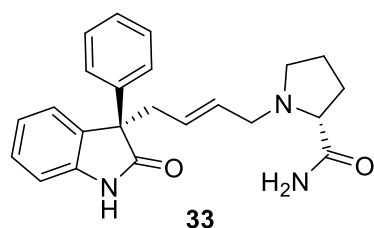

(DCM/MeOH v:v = 20:1); colorless oil; 95% yield (71.3 mg);

$[\alpha] = +46.7$  (c 0.09, CH<sub>3</sub>OH); <sup>1</sup>H NMR (400 MHz, CD<sub>3</sub>OD)  $\delta$

7.33 – 7.16 (m, 6H), 7.14 (dd,  $J = 7.5, 1.2$  Hz, 1H), 7.02 (td,  $J$

= 7.5, 1.1 Hz, 1H), 6.94 (d,  $J = 7.8$  Hz, 1H), 5.65 – 5.47 (m, 1H),

5.21 (dt,  $J = 14.9, 7.0$  Hz, 1H), 3.14 (q,  $J = 7.3$  Hz, 1H), 2.98

(qd,  $J = 12.3, 11.2, 6.7$  Hz, 4H), 2.84 (dd,  $J = 13.4, 7.3$  Hz, 1H), 2.21 – 1.99 (m, 2H), 1.71 (dddd,  $J$

= 23.1, 11.7, 7.8, 4.2 Hz, 3H); <sup>13</sup>C NMR (101 MHz, CD<sub>3</sub>OD)  $\delta$  182.3, 179.5, 143.0, 141.3, 134.3,

131.6, 129.6, 129.4, 128.4, 127.9, 126.0, 123.6, 111.1, 67.2, 58.6, 57.2, 54.0, 40.7, 31.4, 24.6; IR

(KBr)  $\nu_{\text{max}}$ : 3157, 2803, 1702, 1617, 1470, 1195, 969, 752, 95, 659, 602 cm<sup>-1</sup>; HRMS (ESI) m/z:

calcd for C<sub>23</sub>H<sub>26</sub>N<sub>3</sub>O<sub>2</sub><sup>+</sup> [M+H<sup>+</sup>] 376.2020, found 376.2024.

**(1R,5S)-3-((E)-4-((R)-2-oxo-3-Phenylindolin-3-yl)but-2-en-1-yl)-1,2,3,4,5,6-hexahydro-8H-1,5-methanopyrido[1,2-a][1,5]diazocin-8-one (34)**

Following *General Procedure C*, the product **34** was obtained after column chromatography

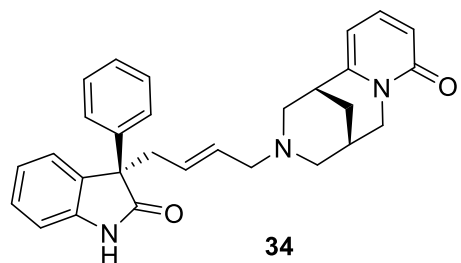

(petroleum ether/EtOAc v:v = 2:1); colorless oil; 98%

yield (88.5 mg);  $[\alpha] = -60.4$  (c 0.10, CHCl<sub>3</sub>); <sup>1</sup>H NMR

(400 MHz, CDCl<sub>3</sub>)  $\delta$  9.62 (s, 1H), 7.40 – 7.32 (m, 2H),

7.29 (t,  $J = 1.6$  Hz, 1H), 7.27 – 7.16 (m, 4H), 7.13 (d,  $J$

= 6.7 Hz, 1H), 7.09 – 7.02 (m, 1H), 6.94 (d,  $J = 7.7$  Hz,

1H), 6.48 (dd,  $J = 9.0, 1.4$  Hz, 1H), 5.97 (dd,  $J = 6.9, 1.4$  Hz, 1H), 5.36 (dt,  $J = 14.0, 6.7$  Hz, 1H),

5.13 (dt,  $J = 14.8, 7.1$  Hz, 1H), 3.95 (d,  $J = 15.4$  Hz, 1H), 3.82 (dd,  $J = 15.4, 6.7$  Hz, 1H), 3.12 –

3.03 (m, 1H), 2.94 – 2.81 (m, 2H), 2.69 (dt,  $J = 13.8, 7.5$  Hz, 2H), 2.57 – 2.39 (m, 2H), 2.19 (ddd,

$J = 39.8, 8.8, 2.8$  Hz, 2H), 1.91 – 1.71 (m, 2H), 1.63 (dt,  $J = 12.8, 3.2$  Hz, 1H); <sup>13</sup>C NMR (101 MHz,

CDCl<sub>3</sub>)  $\delta$  180.2, 163.9, 151.8, 141.9, 139.9, 139.1, 132.7, 131.3, 128.5, 128.2, 128.0, 127.3, 126.9,

125.0, 122.3, 116.4, 110.2, 105.3, 60.8, 59.2, 58.1, 57.2, 50.0, 40.5, 35.5, 27.7, 25.8; IR (KBr)  $\nu_{\text{max}}$ :

2934, 1712, 1642, 1542, 1470, 1135, 973, 798, 752, 695 cm<sup>-1</sup>; HRMS (ESI) m/z: calcd for

C<sub>29</sub>H<sub>30</sub>N<sub>3</sub>O<sub>2</sub><sup>+</sup> [M+H<sup>+</sup>] 452.2333, found 452.2361.

## 5. Study of the non-linear effect

To an oven-dried schlenk tube,  $\text{Pd}_2(\text{dba})_3 \cdot \text{CHCl}_3$  (2.6 mg, 0.0025 mmol), **L11** (x mg) and *ent*-**L11** (y mg) in the mixed solvents of toluene/MeOH (v:v = 10:1, 1.0 mL) were added under a nitrogen atmosphere. The mixture was stirred for 1.0 hour at 25 °C to produce an orange solution. After that, the solution was cooled to -40 °C and stirred for additional 15 minutes, followed by the addition of 3-substituted oxindole **A1** (61.8 mg, 0.20 mmol). Then, the mixture was stirred for additional 10 minutes, and a solution of 2-vinyloxirane **B** (44.7 mg, 0.20 mmol) in the mixed solvents of toluene/MeOH (v:v = 10:1, 1.0 mL) was added dropwise. Subsequently, the mixture was stirred at -40 °C for 12 hours and then it was subjected to silica gel column (petroleum ether/EtOAc v:v = 5:1 ) to afford the desired product **1**.

**Table S9.** Study of the non-linear effect

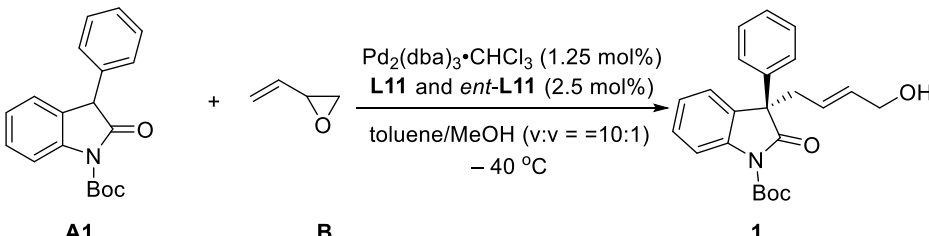

| entry | x/y (mg) | ee (%) ( <b>L11</b> + <i>ent</i> - <b>L11</b> ) | yield (%) <sup>[b]</sup> | ee (%) <sup>[c]</sup> |
|-------|----------|-------------------------------------------------|--------------------------|-----------------------|
| 1     | 2.1/2.1  | 0                                               | 84                       | 0                     |
| 2     | 2.5/1.7  | 20                                              | 82                       | 25                    |
| 3     | 2.9/1.3  | 40                                              | 84                       | 55                    |
| 4     | 3.4/0.8  | 60                                              | 81                       | 83                    |
| 5     | 3.8/0.4  | 80                                              | 80                       | 94                    |
| 6     | 4.2/0    | 100                                             | 85                       | 95                    |

[a] Unless otherwise noted, reactions were carried out with **A1** (0.20 mmol), **B** (0.20 mmol),  $\text{Pd}_2(\text{dba})_3 \cdot \text{CHCl}_3$  (1.25 mol%) and **L11** and *ent*-**L11** (2.5 mol%) in the mixed solvents of toluene/MeOH (v:v = 10:1, 2.0 mL) at -40 °C for 12 hours.

[b] Isolated yield. [c] Determined by chiral HPLC.

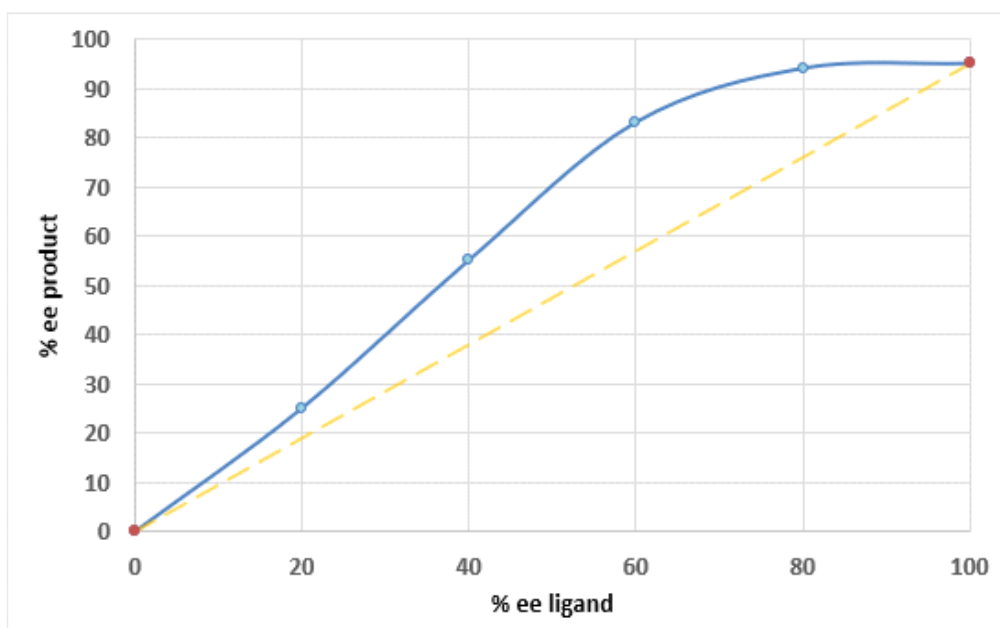

**Fig. S1** Study of the non-linear effect

## 6. X-Ray data of 7

**Table S10.** Crystal data and structure refinement for 7

|                                        |                                                 |
|----------------------------------------|-------------------------------------------------|
| Identification code                    | ga20230228bb_0m_a                               |
| Empirical formula                      | C <sub>24</sub> H <sub>27</sub> NO <sub>5</sub> |
| Formula weight                         | 409.46                                          |
| Temperature/K                          | 120.00                                          |
| Crystal system                         | monoclinic                                      |
| Space group                            | C <sub>2</sub>                                  |
| a/Å                                    | 22.512(5)                                       |
| b/Å                                    | 19.096(4)                                       |
| c/Å                                    | 10.544(2)                                       |
| $\alpha$ /°                            | 90                                              |
| $\beta$ /°                             | 95.883(7)                                       |
| $\gamma$ /°                            | 90                                              |
| Volume/Å <sup>3</sup>                  | 4508.9(17)                                      |
| Z                                      | 8                                               |
| $\rho$ calc/cm <sup>3</sup>            | 1.206                                           |
| $\mu$ /mm <sup>-1</sup>                | 0.437                                           |
| F(000)                                 | 1744.0                                          |
| Crystal size/mm <sup>3</sup>           | 0.2 × 0.15 × 0.13                               |
| Radiation                              | GaK $\alpha$ ( $\lambda$ = 1.34138)             |
| 2 $\theta$ range for data collection/° | 5.592 to 106.64                                 |
| Index ranges                           | -26 ≤ h ≤ 26, -21 ≤ k ≤ 21, -12 ≤ l ≤ 12        |

|                                                |                                                                  |
|------------------------------------------------|------------------------------------------------------------------|
| Reflections collected                          | 39458                                                            |
| Independent reflections                        | 7684 [ $R_{\text{int}} = 0.0604$ , $R_{\text{sigma}} = 0.0469$ ] |
| Data/restraints/parameters                     | 7684/359/606                                                     |
| Goodness-of-fit on $F^2$                       | 1.087                                                            |
| Final R indexes [ $I \geq 2\sigma(I)$ ]        | $R_1 = 0.0731$ , $wR_2 = 0.2027$                                 |
| Final R indexes [all data]                     | $R_1 = 0.0771$ , $wR_2 = 0.2077$                                 |
| Largest diff. peak/hole / $e \text{ \AA}^{-3}$ | 0.52/-0.28                                                       |
| Flack parameter                                | 0.04(15)                                                         |

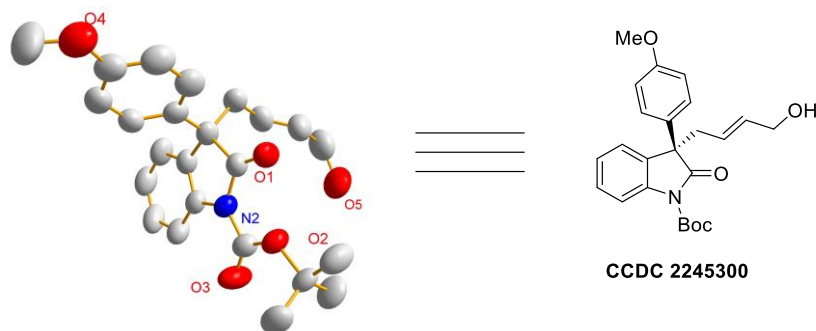

**Fig. S2** ORTEP drawing of **7** (50% thermal ellipsoids)

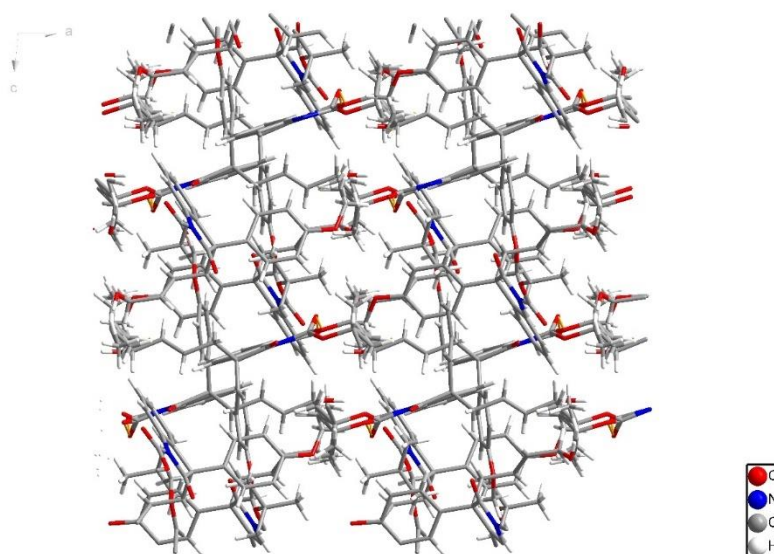

**Figure S3.** Packing of moleculars in a unit cell of **7**

The product **7** (30 mg) was dissolved in methanol until the solution was supersaturated. Then diethyl ether was added until the solution was turbid. Methanol was further added until the solution became clear. The solution was sealed up and several holes were made on the cap. As the solvents evaporating, the crystals **7** were obtained. CCDC **2245300** contains the supplementary crystallographic data for this paper. These data can be obtained free of charge from The Cambridge Crystallographic Data Centre via [www.ccdc.cam.ac.uk/data\\_request/cif](http://www.ccdc.cam.ac.uk/data_request/cif).



## 7. NMR spectra

### *tert*-Butyl (*R,E*)-3-(4-hydroxybut-2-en-1-yl)-2-oxo-3-phenylindoline-1-carboxylate (**1**)

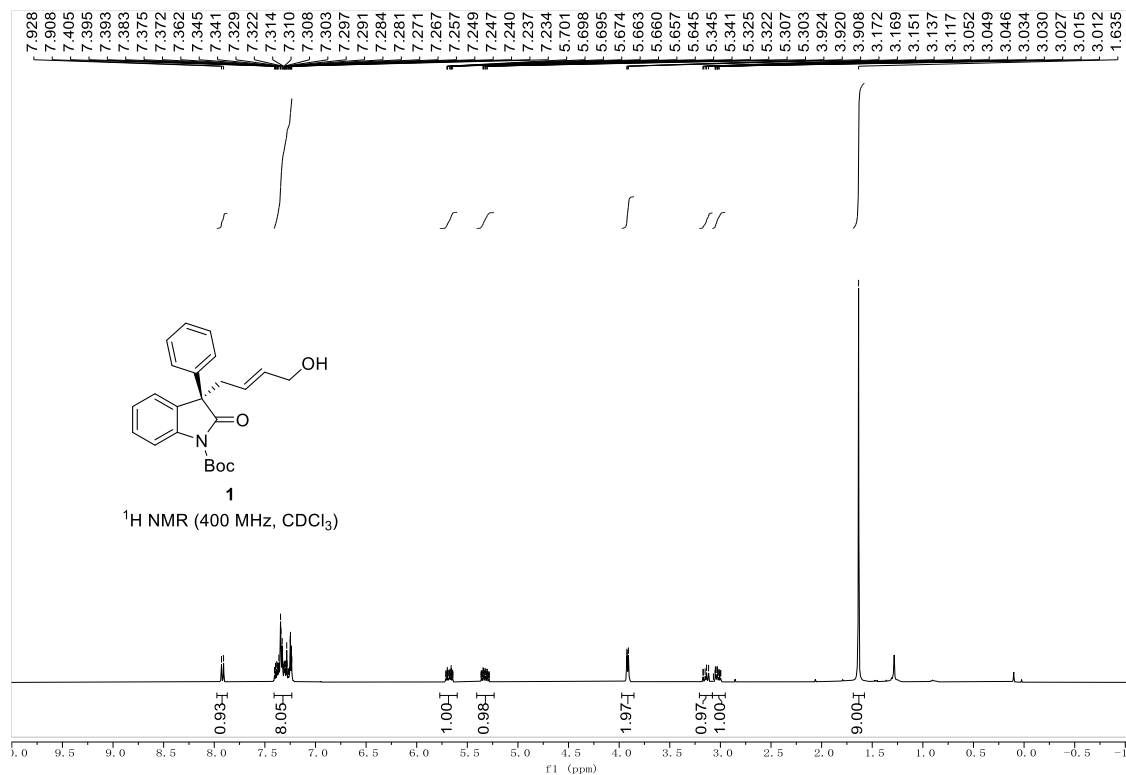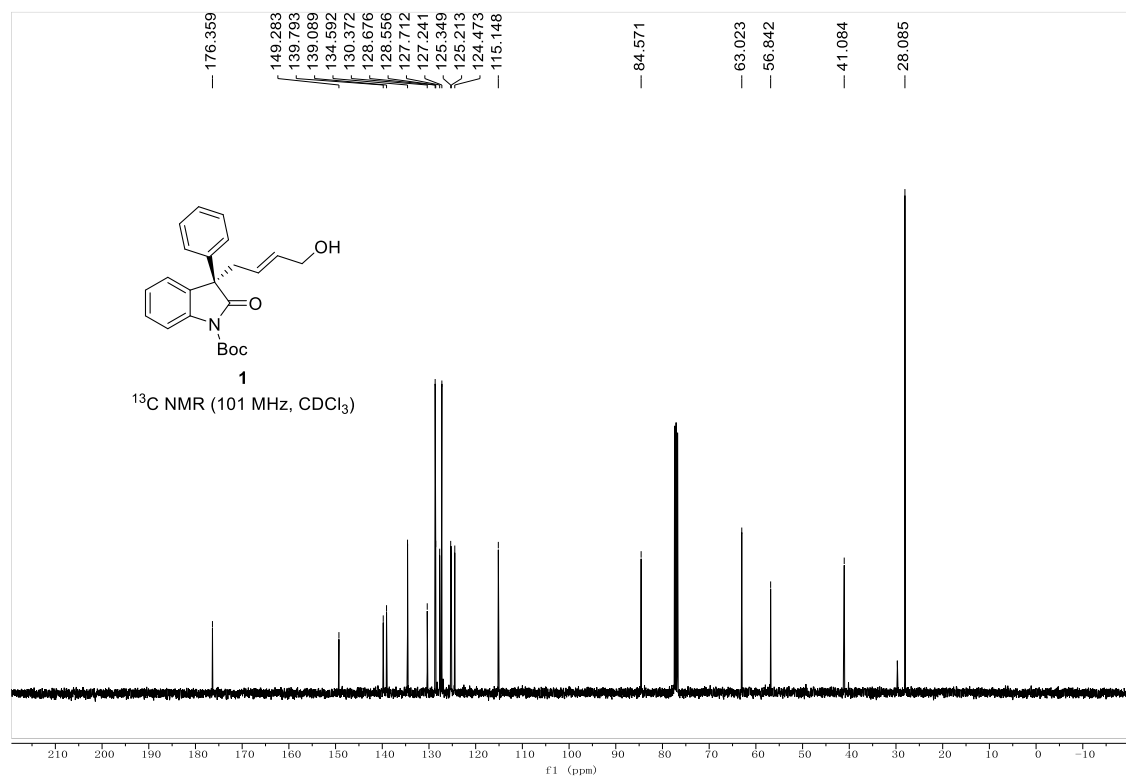

**tert-Butyl (R, E)-3-(4-hydroxybut-2-en-1-yl)-3-(3-methoxyphenyl)-2-oxindoline-1-carboxylate (2)**

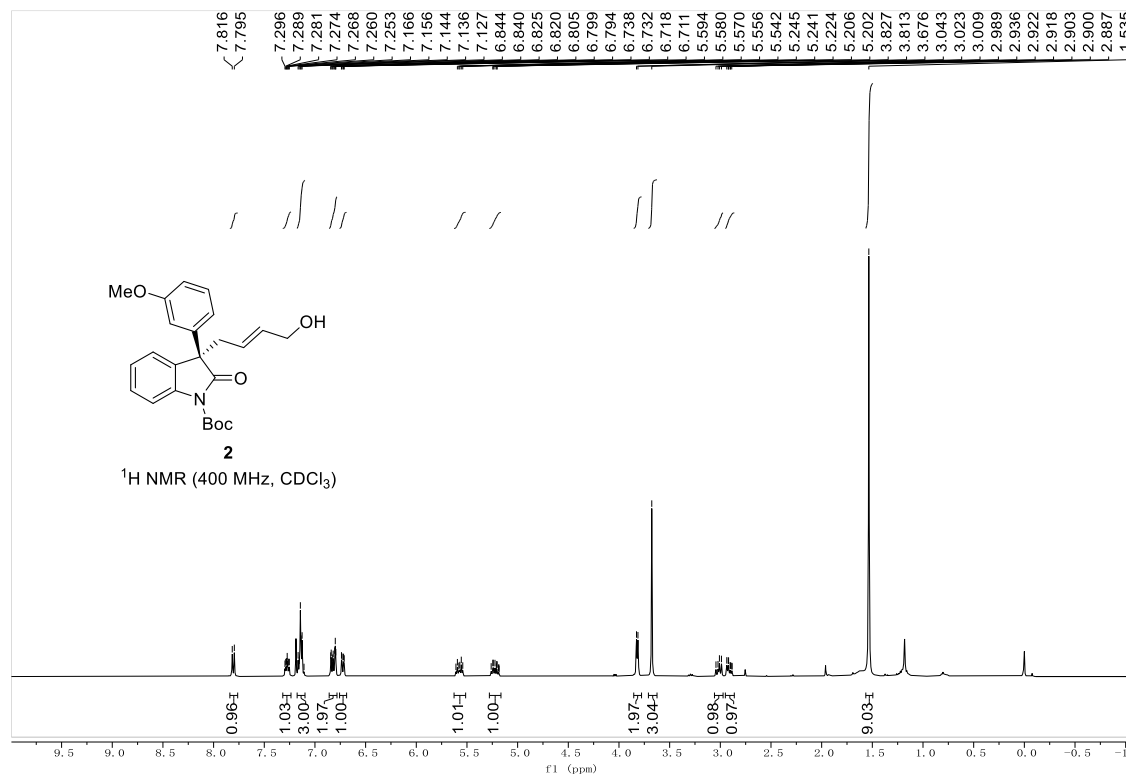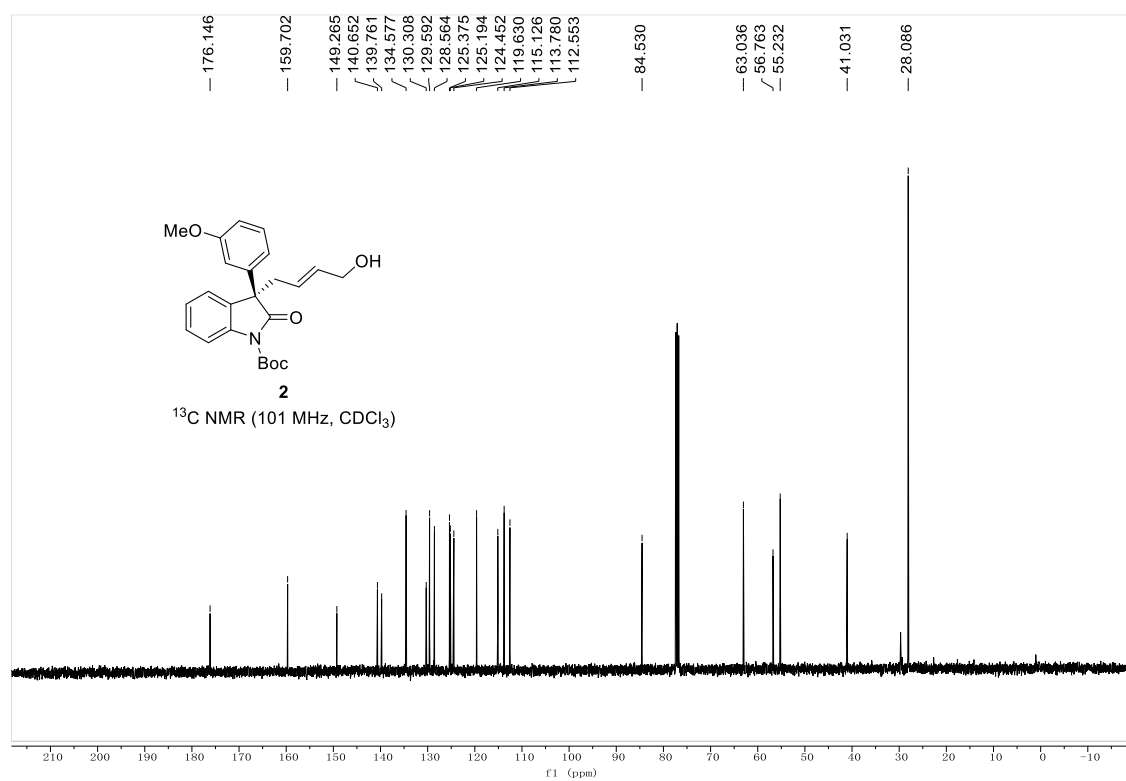

**tert-Butyl (R, E)-3-(4-hydroxybut-2-en-1-yl)-2-oxo-3-(m-tolyl)indoline-1-carboxylate (3)**

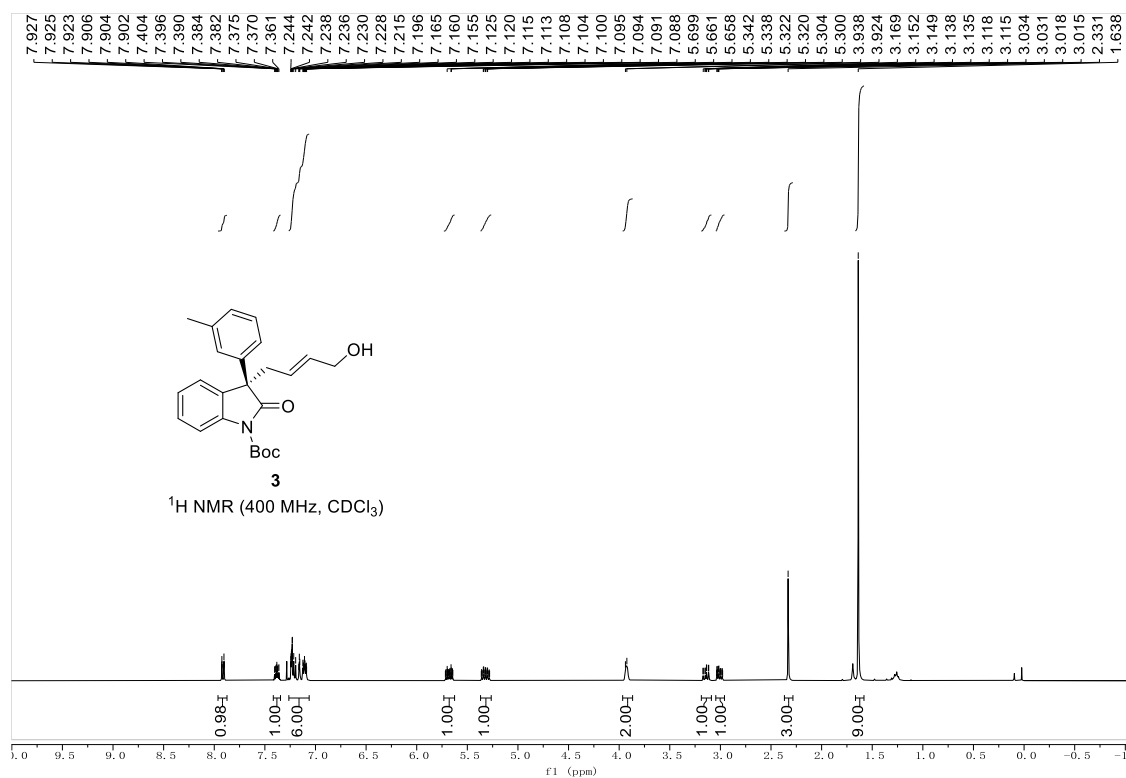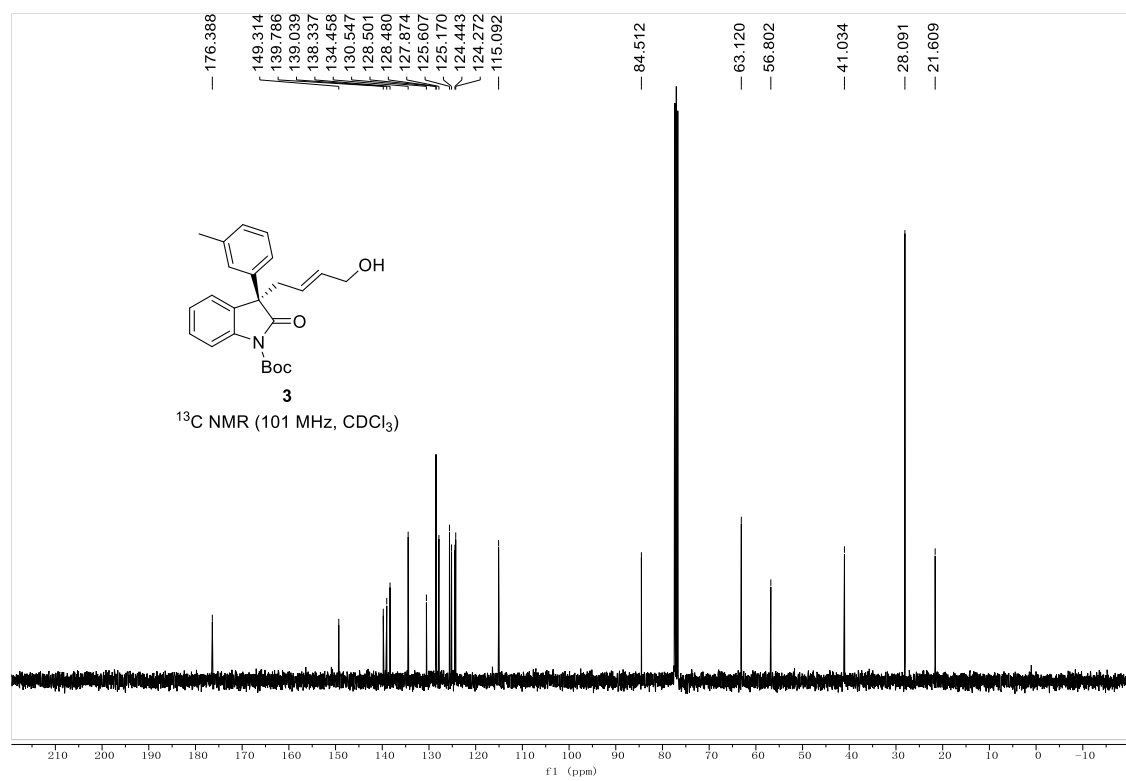

**tert-Butyl (R, E)-3-(3-fluorophenyl)-3-(4-hydroxybut-2-en-1-yl)-2-oxindoline-1-carboxylate**

**(4)**

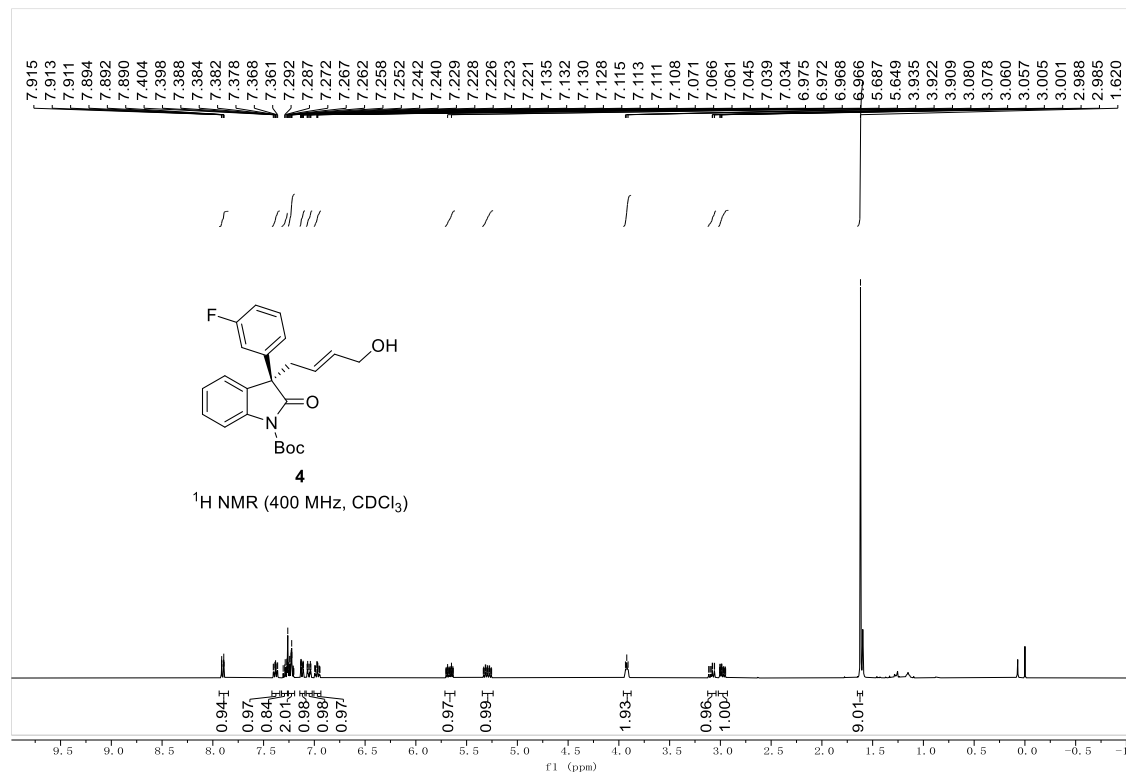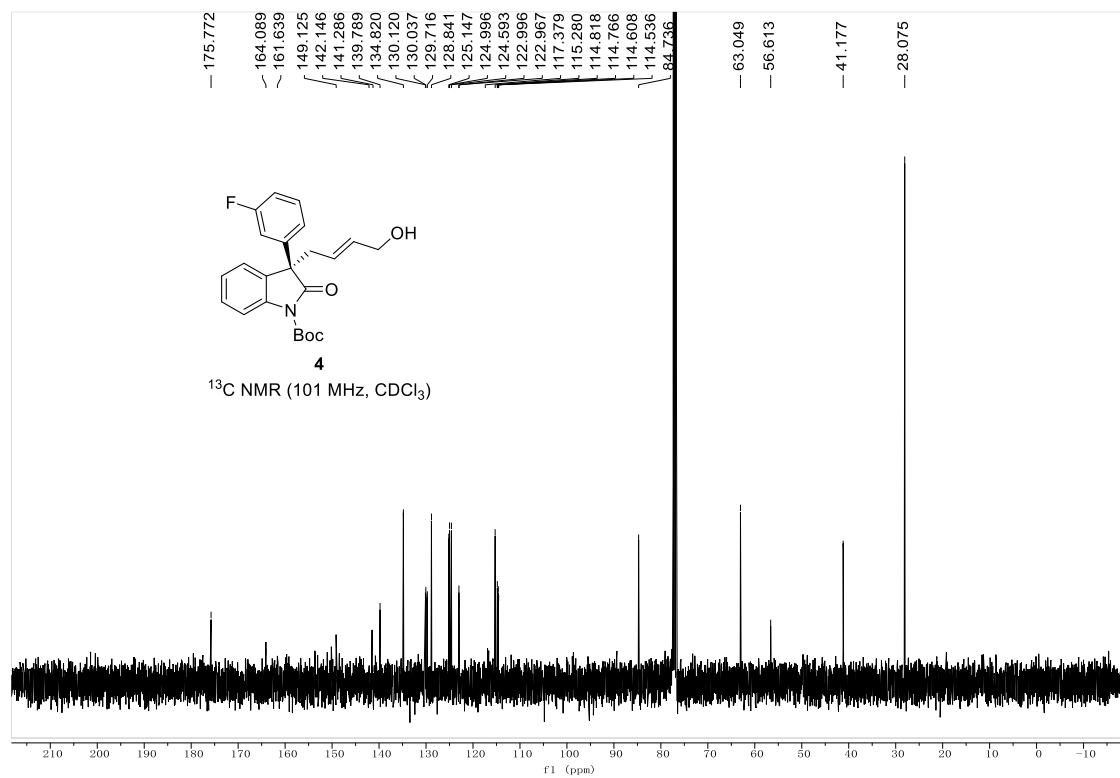

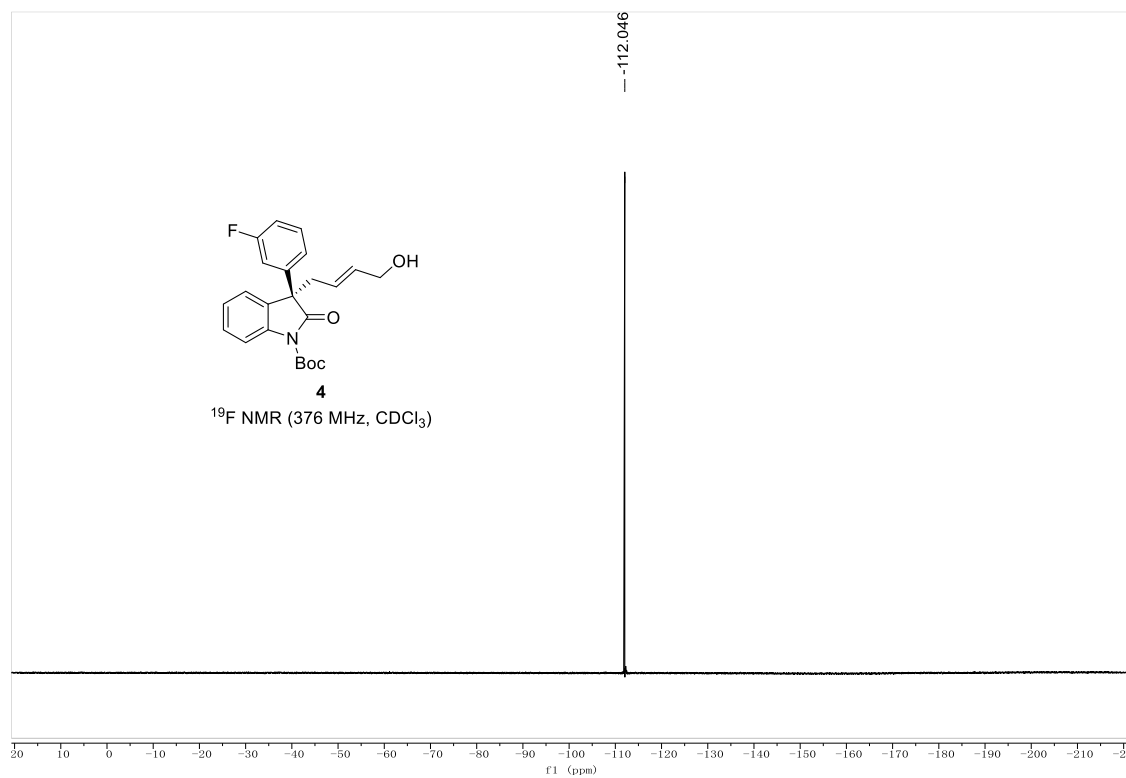

**tert-Butyl (R, E)-3-(3-chlorophenyl)-3-(4-hydroxybut-2-en-1-yl)-2-oxindole-1-carboxylate**

(5)

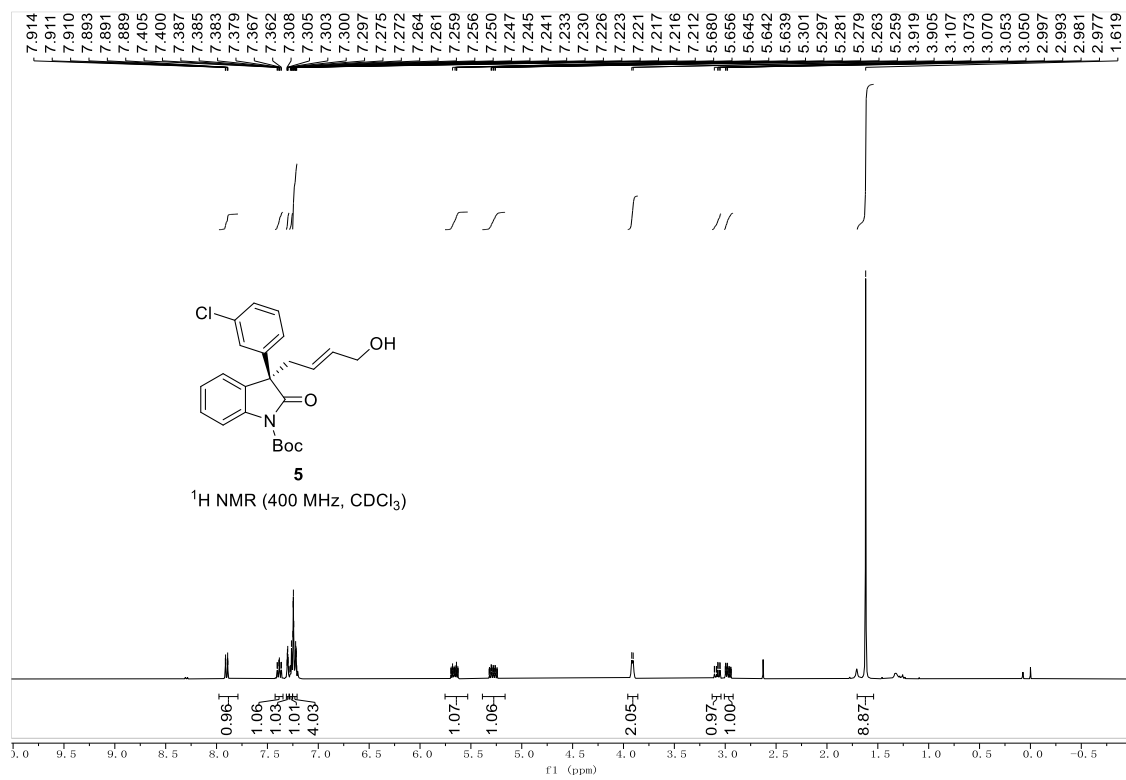

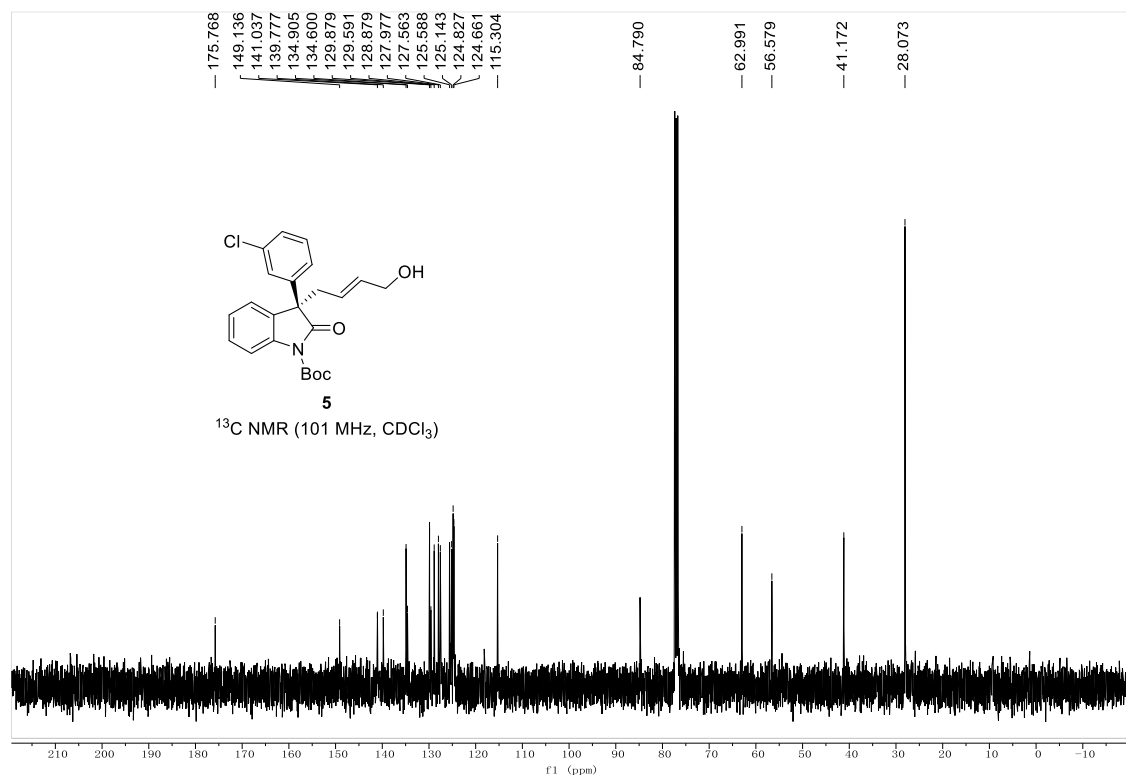

***tert*-Butyl (R, E)-3-(4-(dimethylamino)phenyl)-3-(4-hydroxybut-2-en-1-yl)-2-oxindoline-1-carboxylate (6)**

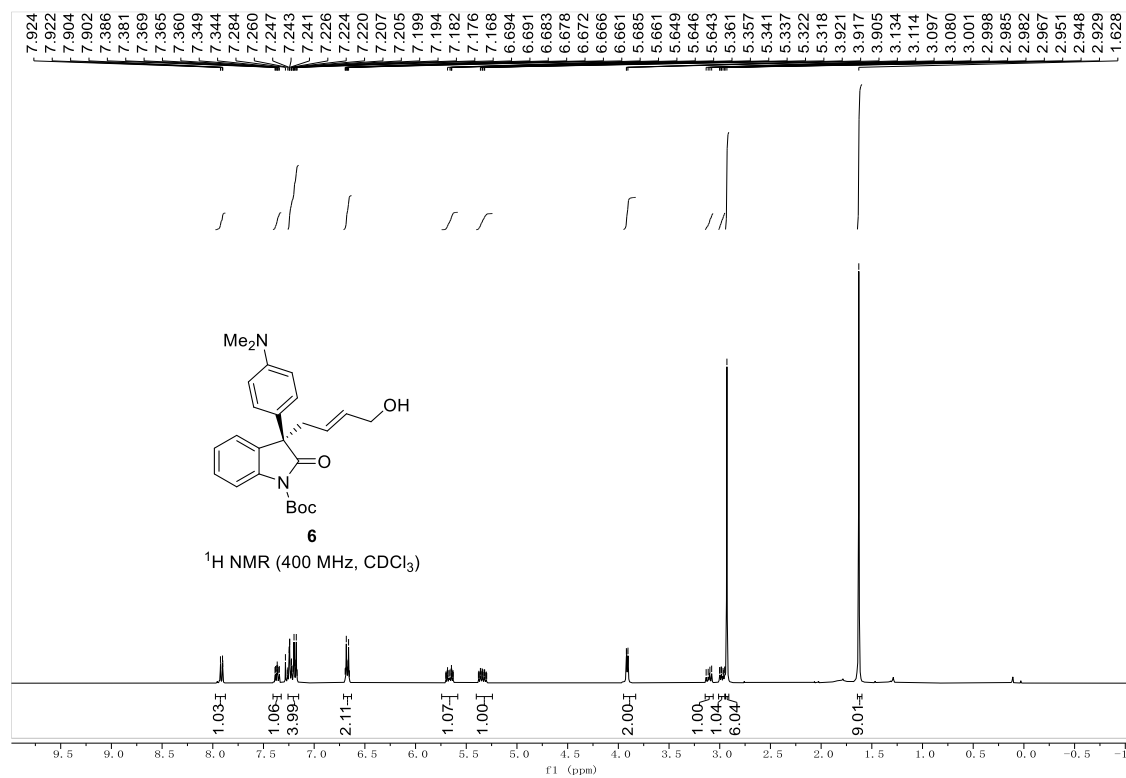

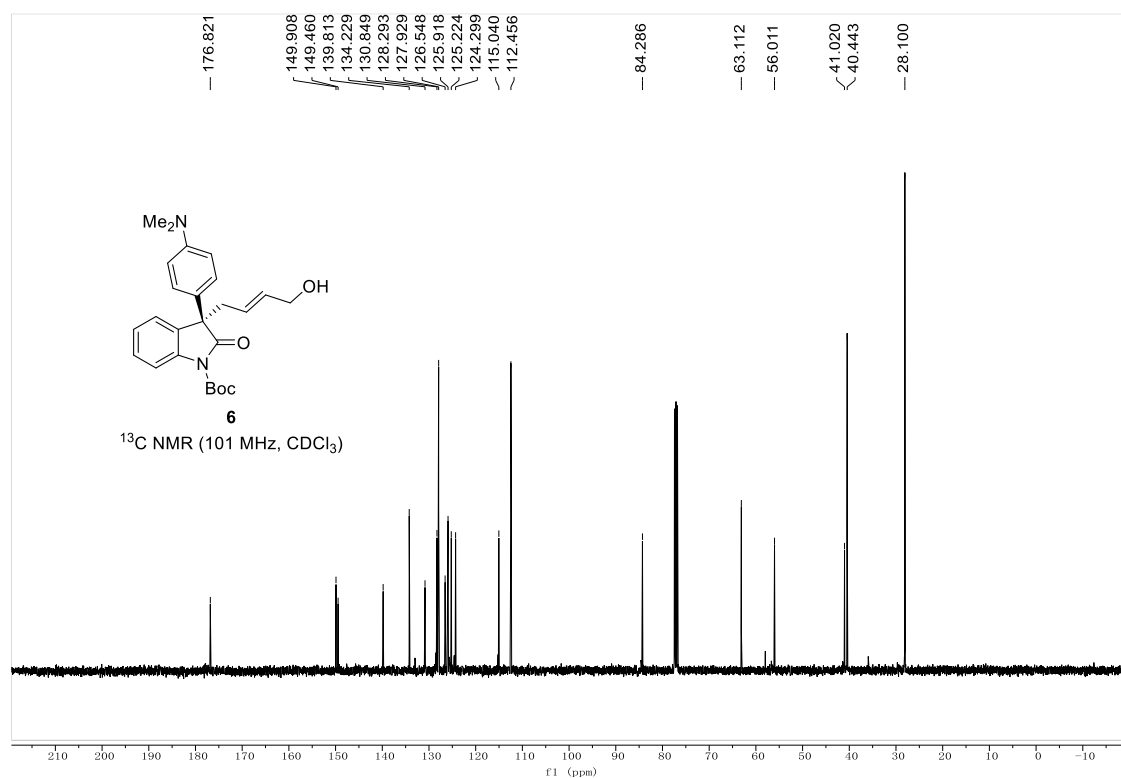

***tert*-Butyl (*R*, *E*)-3-(4-hydroxybut-2-en-1-yl)-3-(4-methoxyphenyl)-2-oxindoline-1-carboxylate (7)**

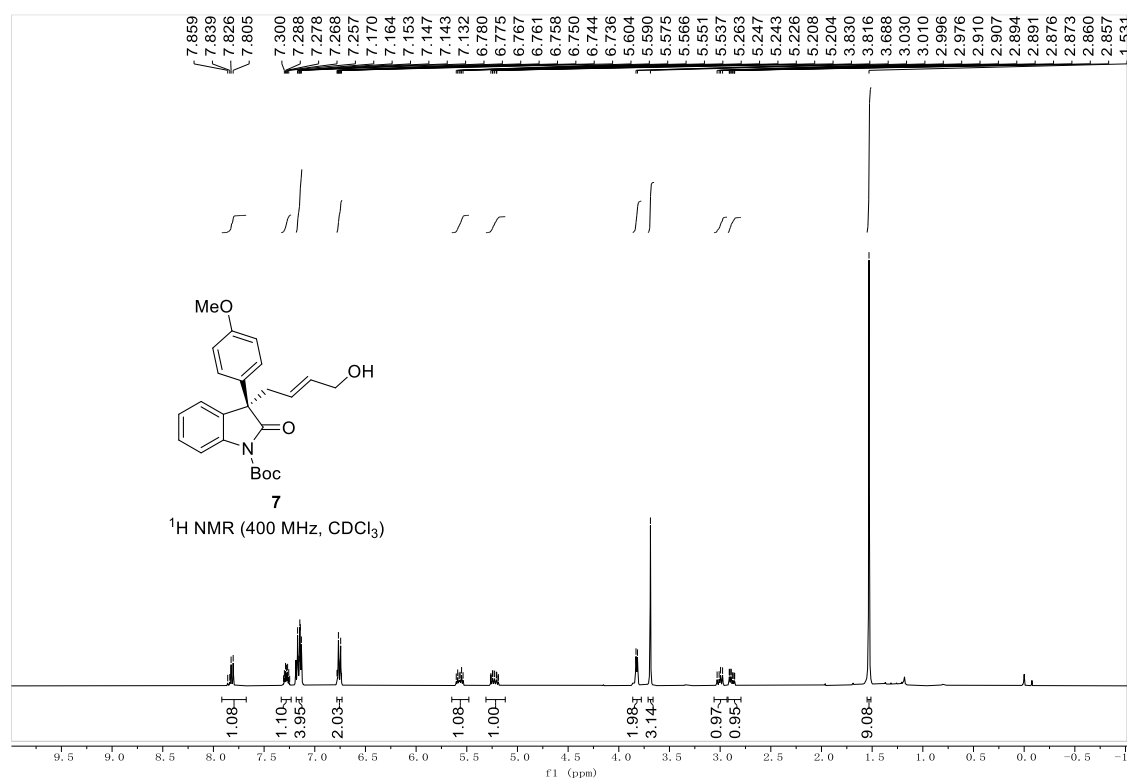

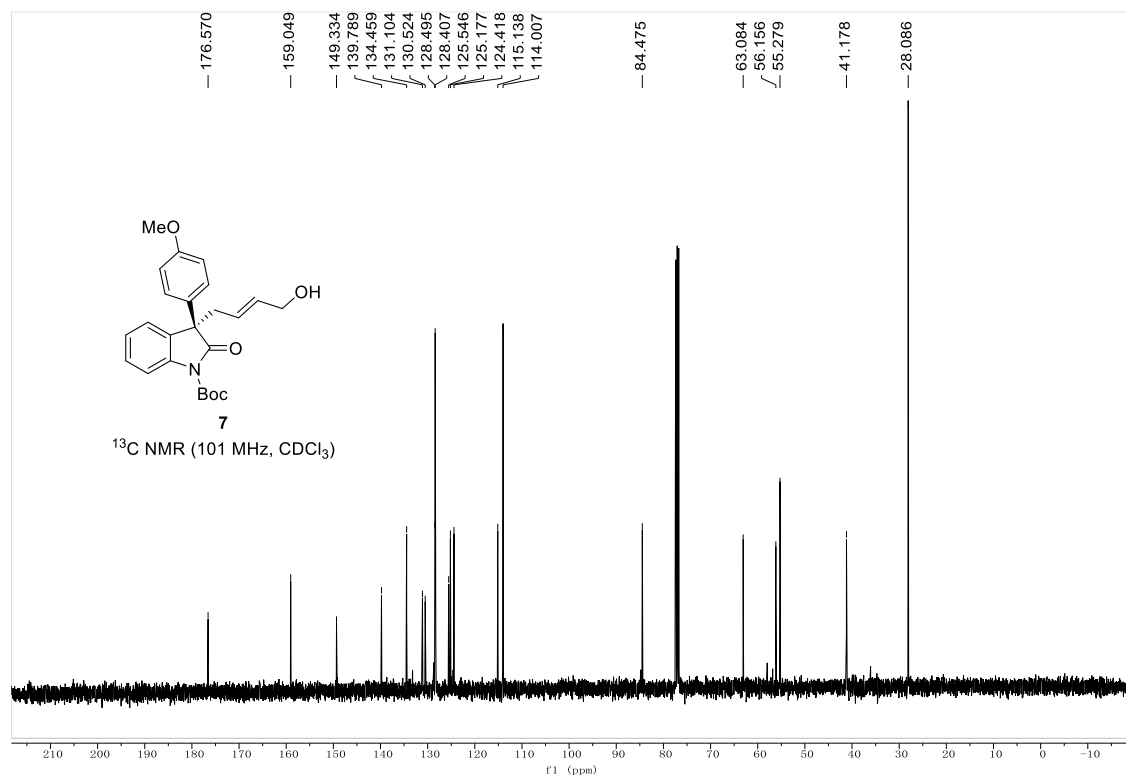

**tert-Butyl (R,E)-3-(4-hydroxybut-2-en-1-yl)-2-oxo-3-(p-tolyl)indoline-1-carboxylate (8)**

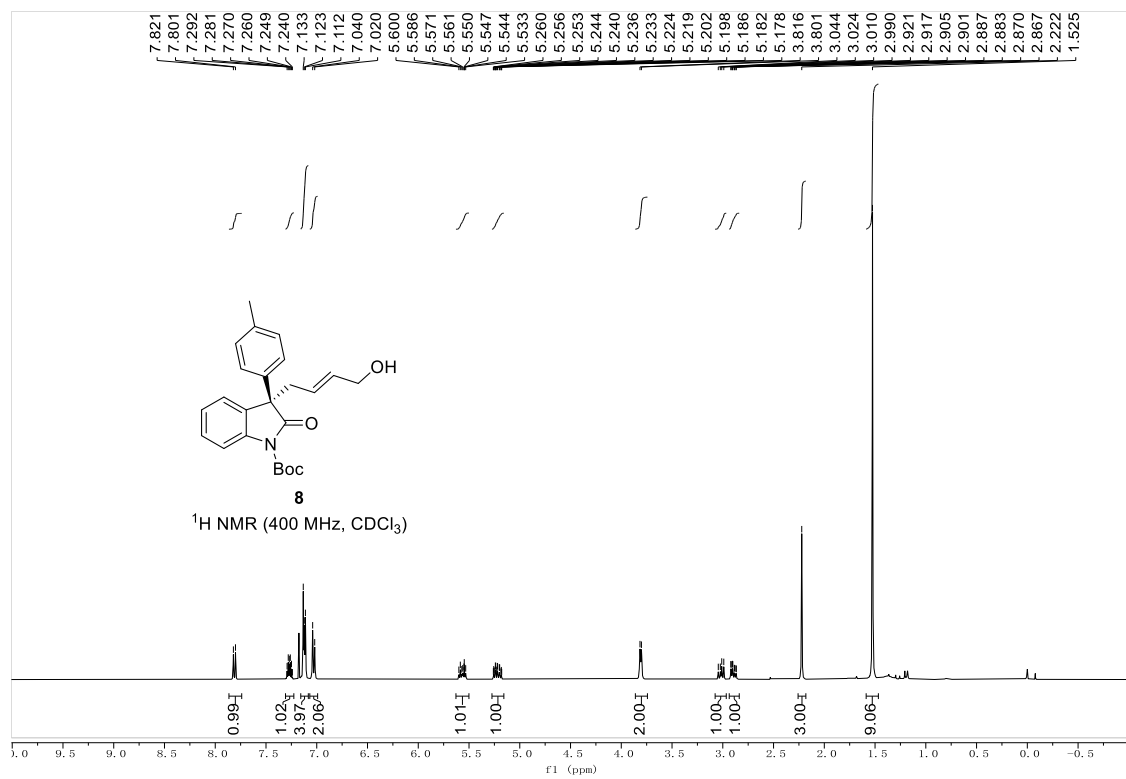



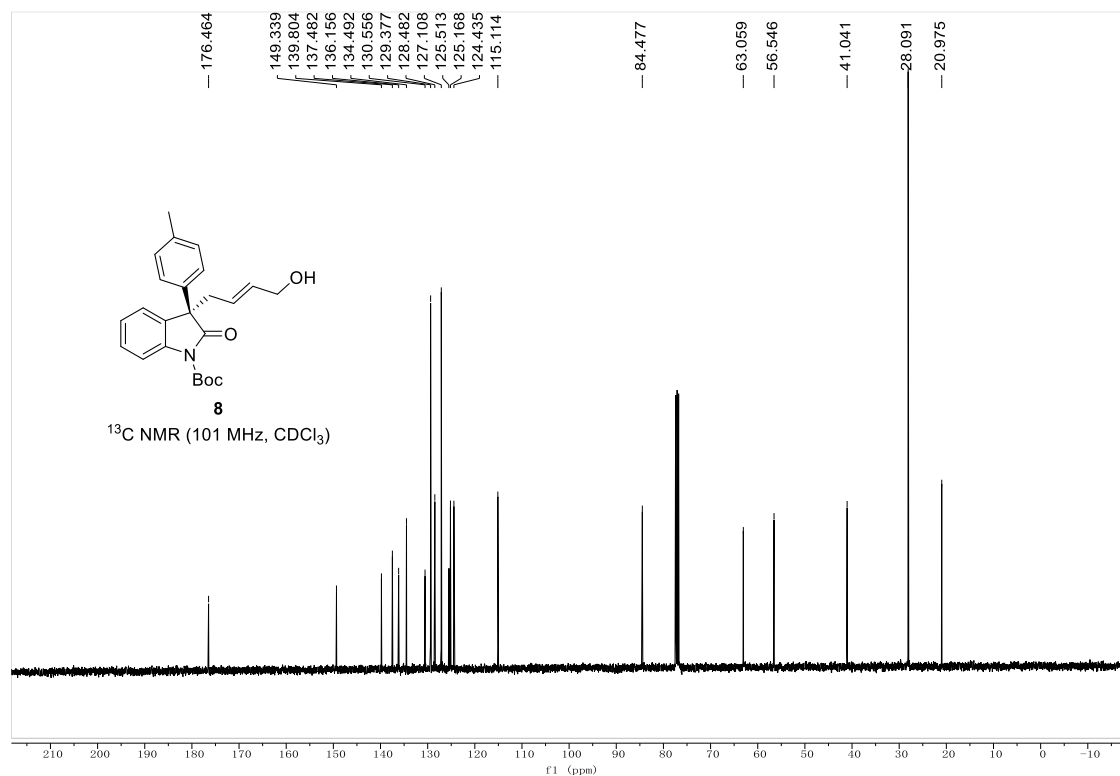

***tert*-Butyl (*R*, *E*)-3-(4-ethylphenyl)-3-(4-hydroxybut-2-en-1-yl)-2-oxindoline-1-carboxylate**

**(9)**

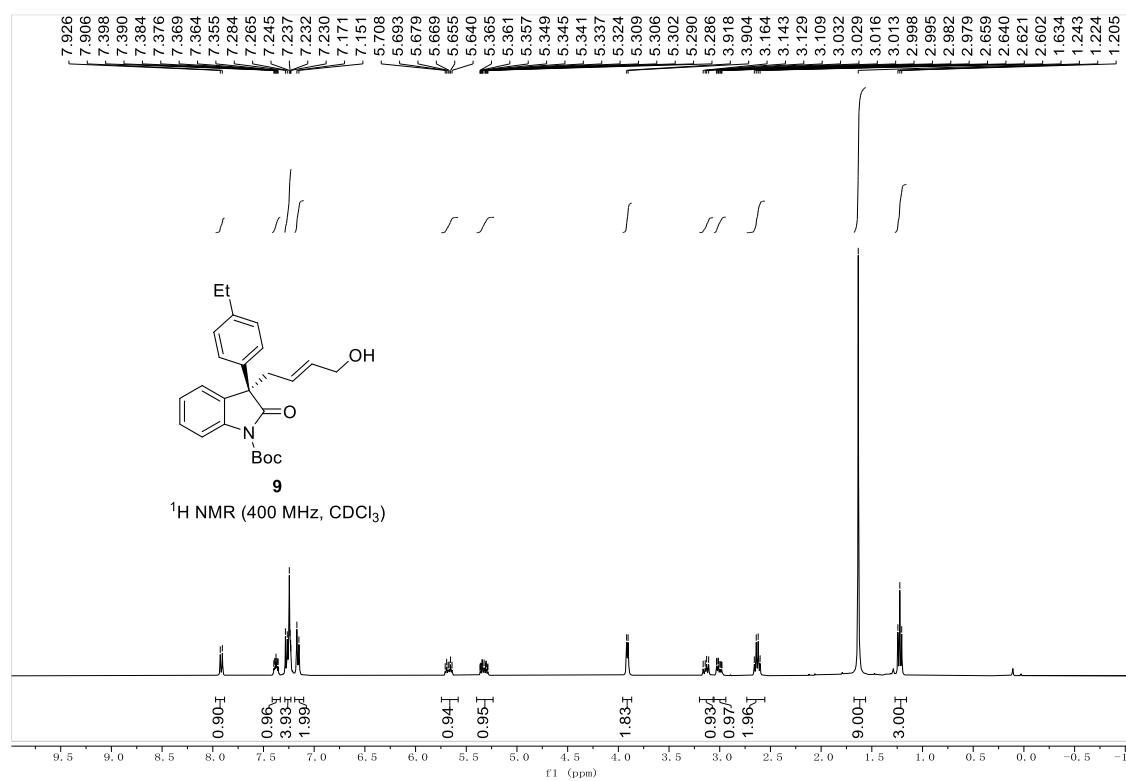

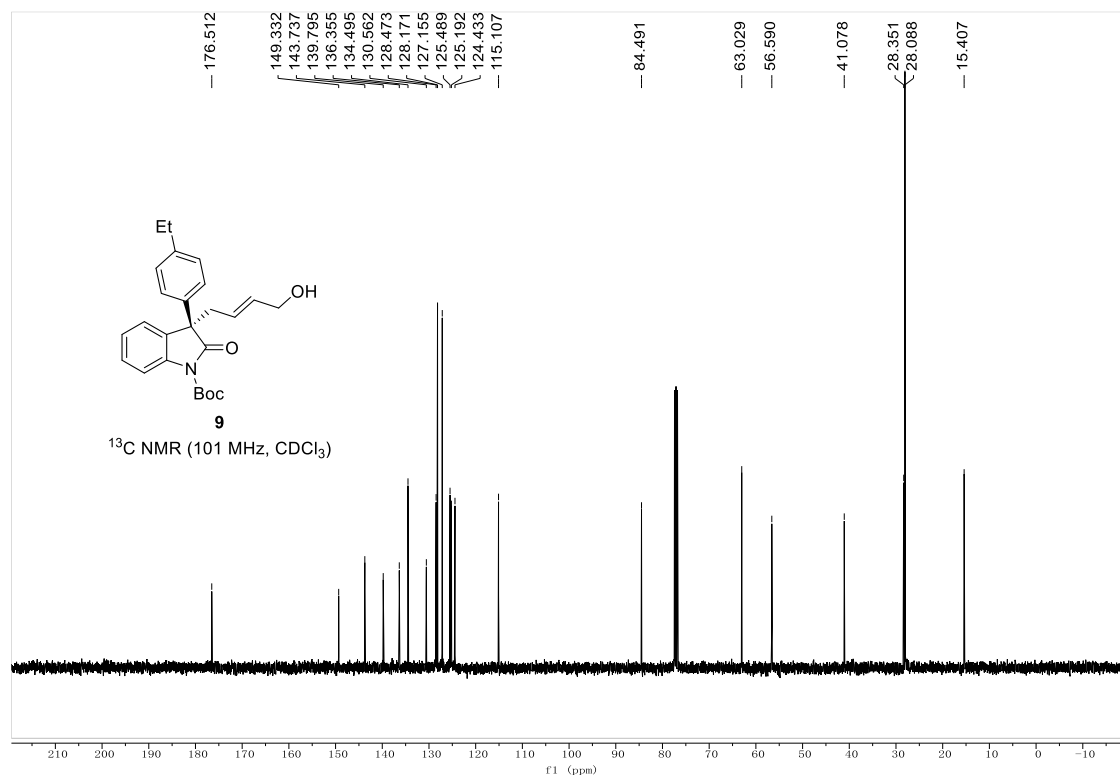

***tert*-Butyl (*R*, *E*)-3-(4-(*tert*-butyl)phenyl)-3-(4-hydroxybut-2-en-1-yl)-2-oxindoline-1-carboxylate (**10**)**

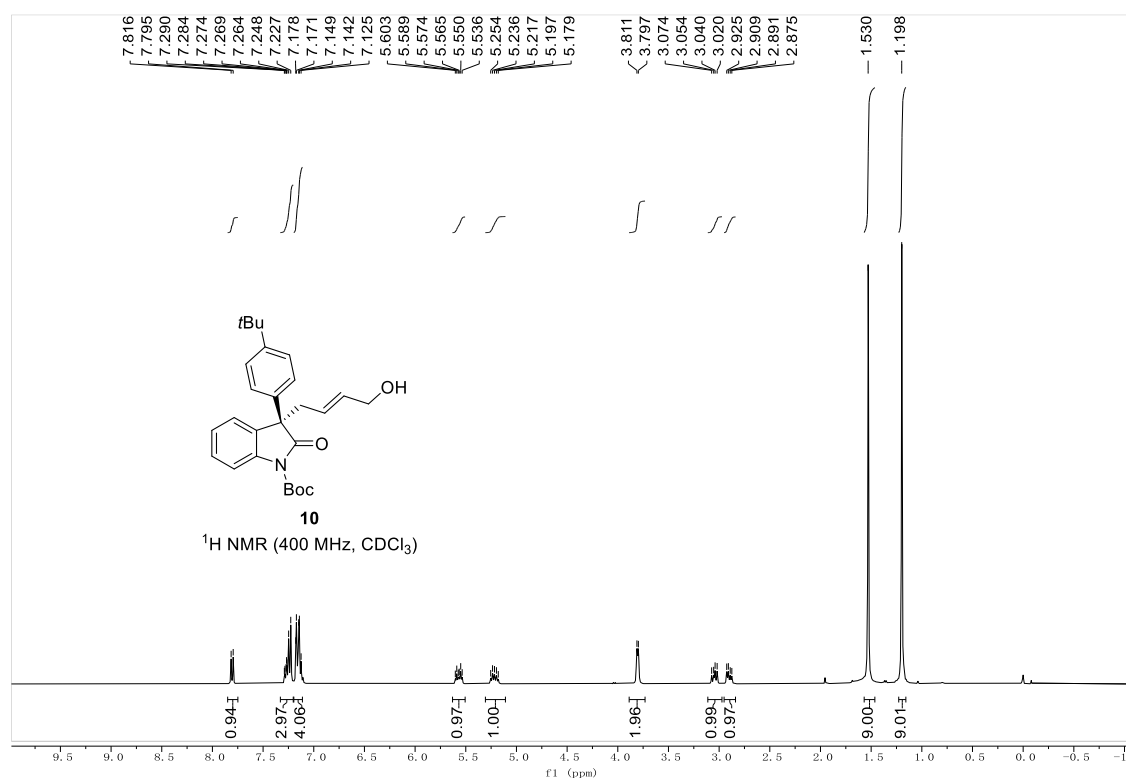

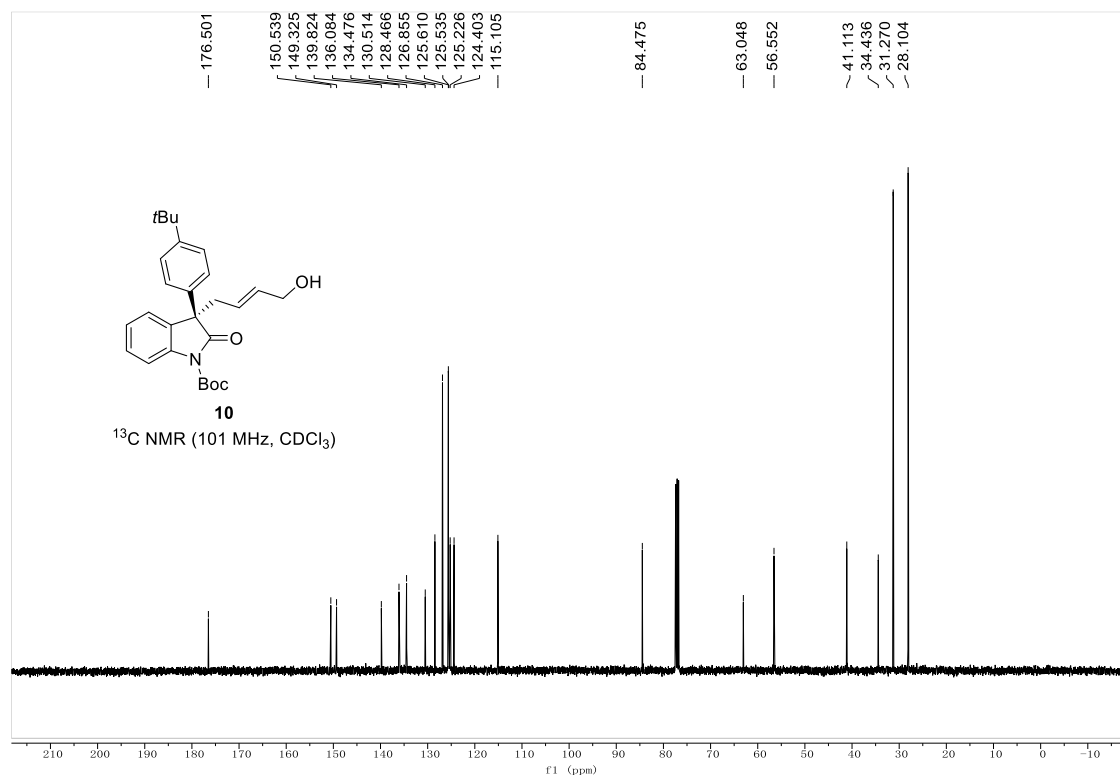

***tert*-Butyl (R, E)-3-([1,1'-biphenyl]-4-yl)-3-(4-hydroxybut-2-en-1-yl)-2-oxindoline-1-carboxylate (11)**

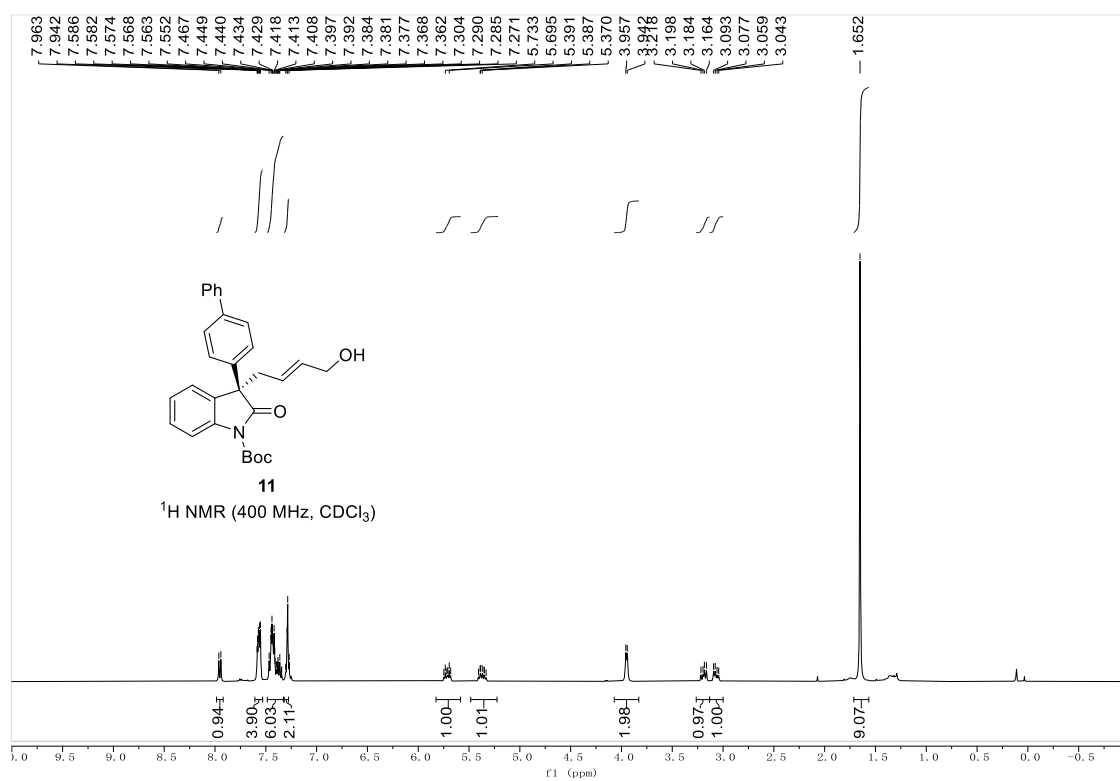

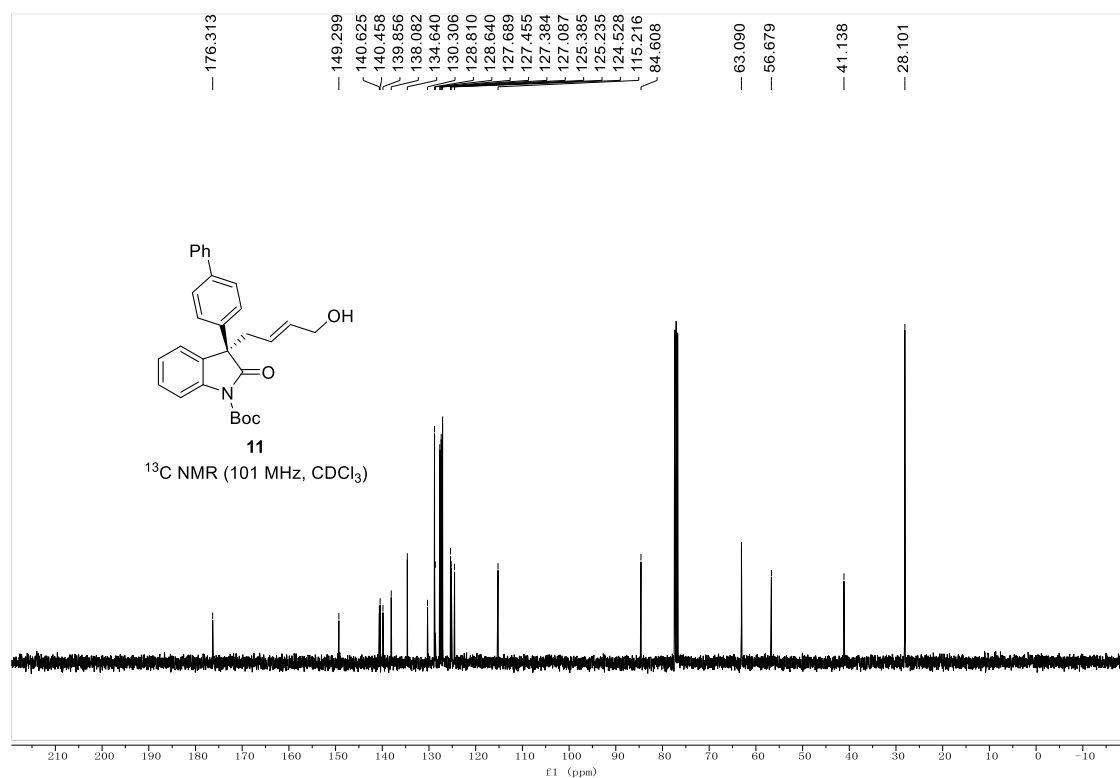

***tert*-Butyl (R, E)-3-(4-fluorophenyl)-3-(4-hydroxybut-2-en-1-yl)-2-oxindoline-1-carboxylate**

**(12)**

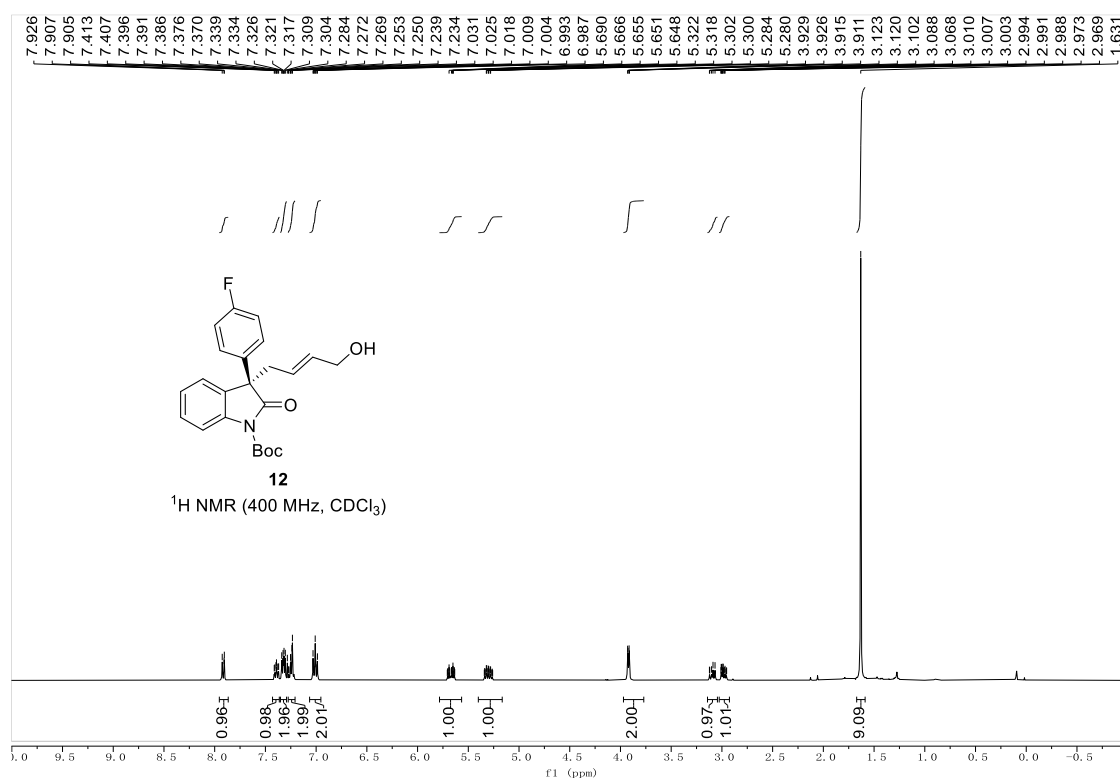

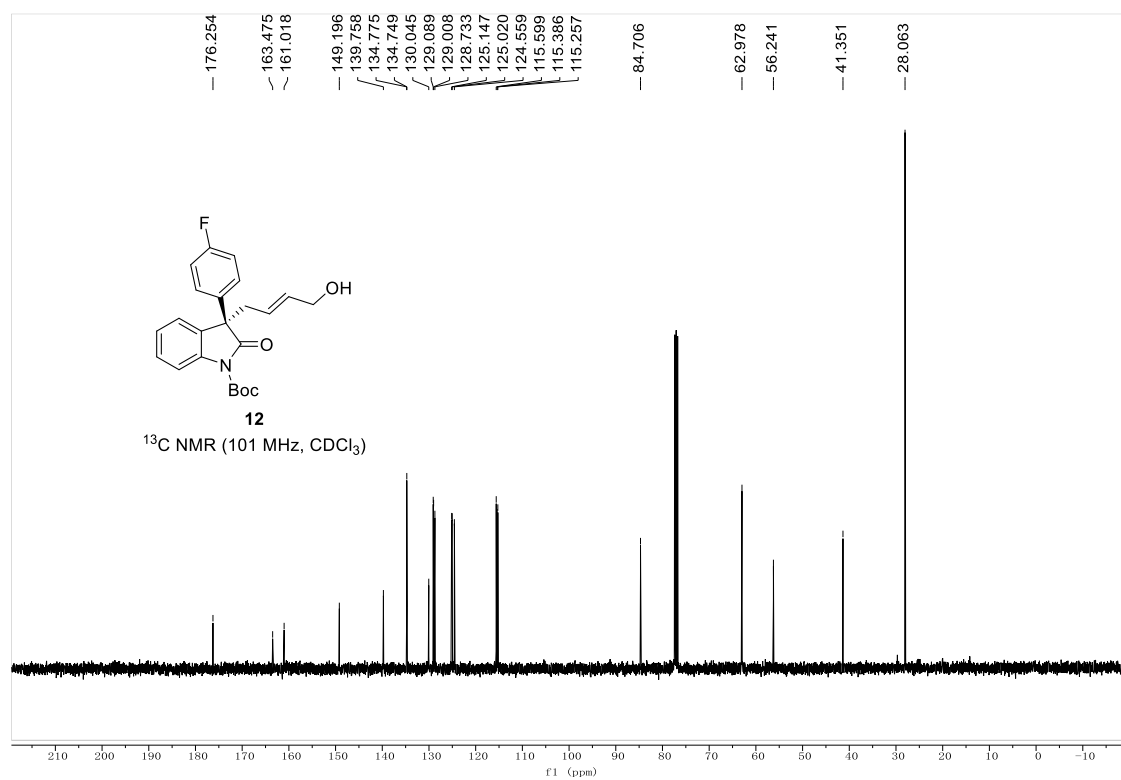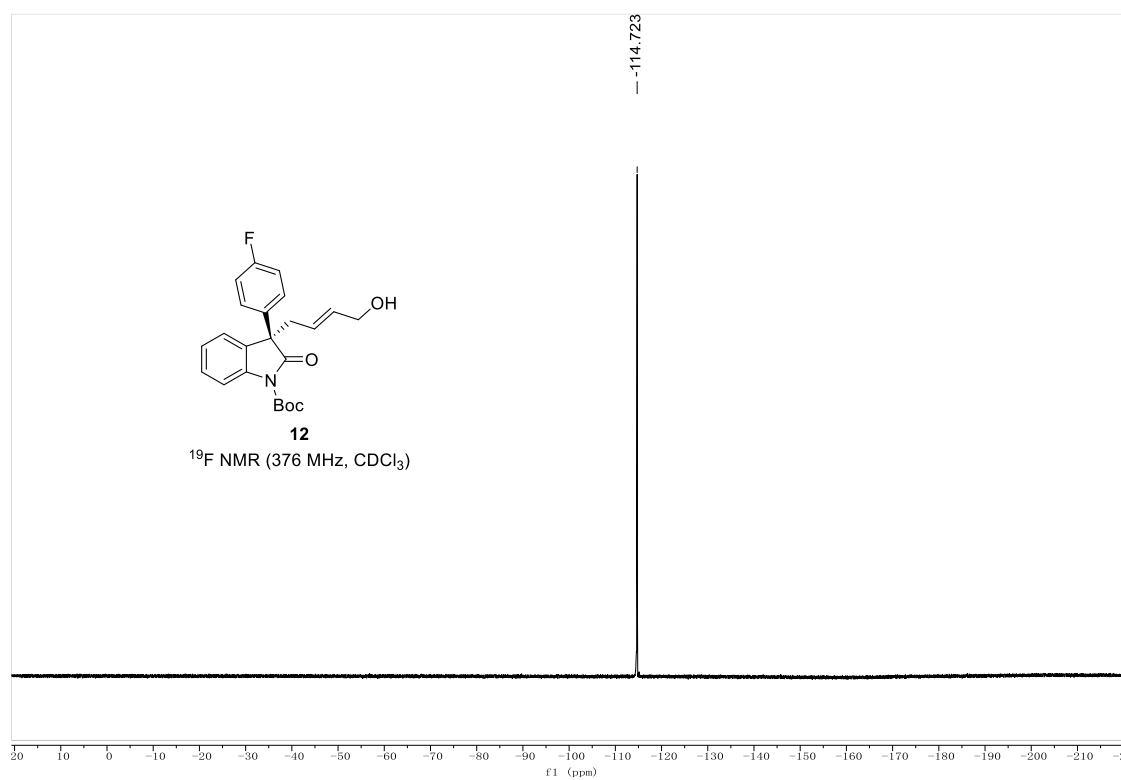

***tert*-Butyl (*R, E*)-3-(4-chlorophenyl)-3-(4-hydroxybut-2-en-1-yl)-2-oxindoline-1-carboxylate**

**(13)**

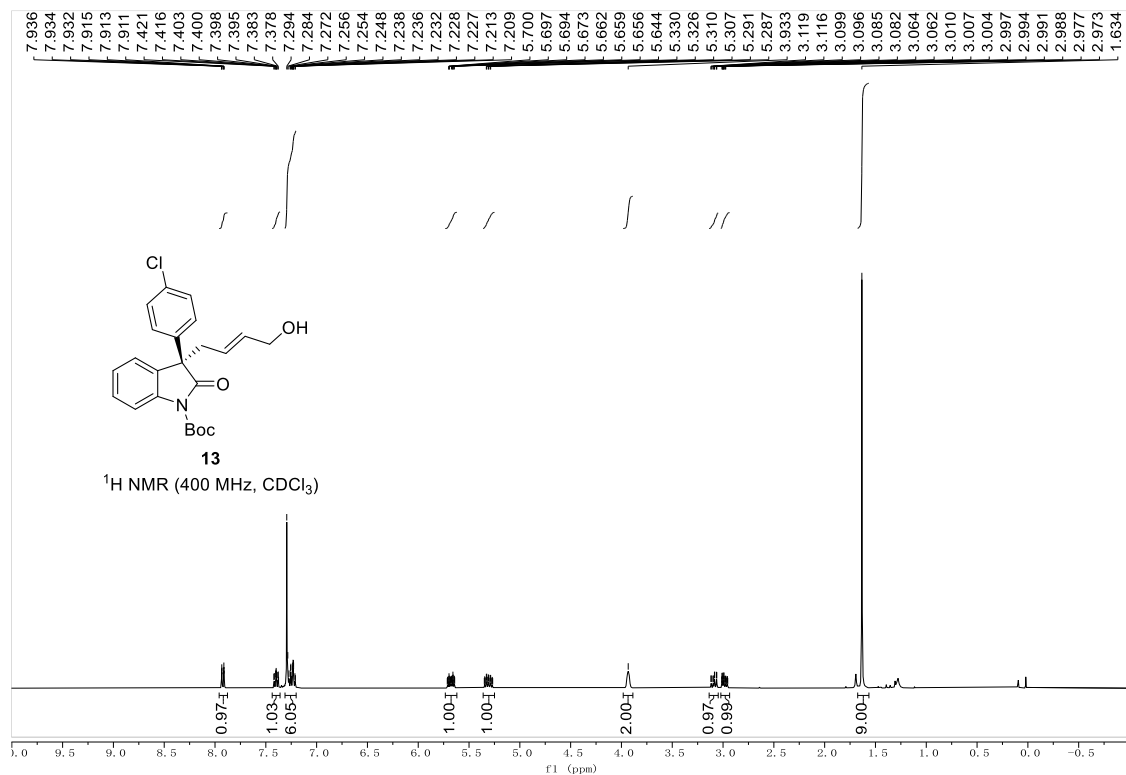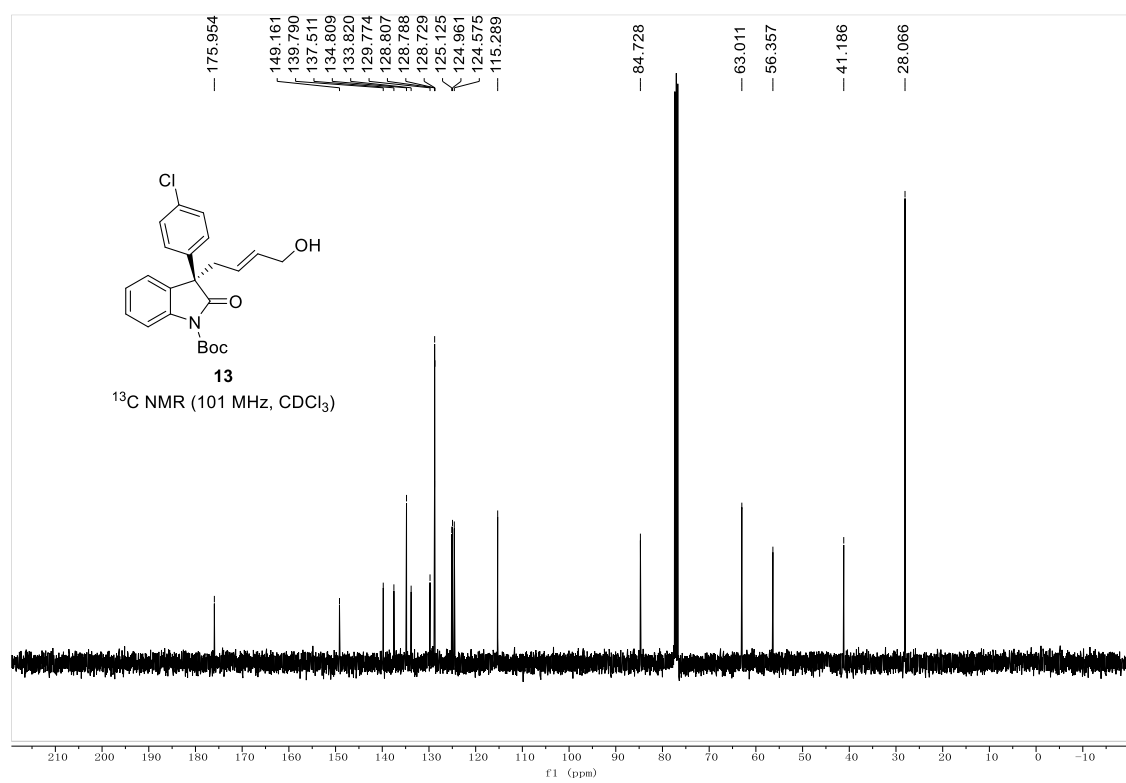

***tert*-Butyl (*R*, *E*)-3-(4-bromophenyl)-3-(4-hydroxybut-2-en-1-yl)-2-oxindoline-1-carboxylate**

**(14)**

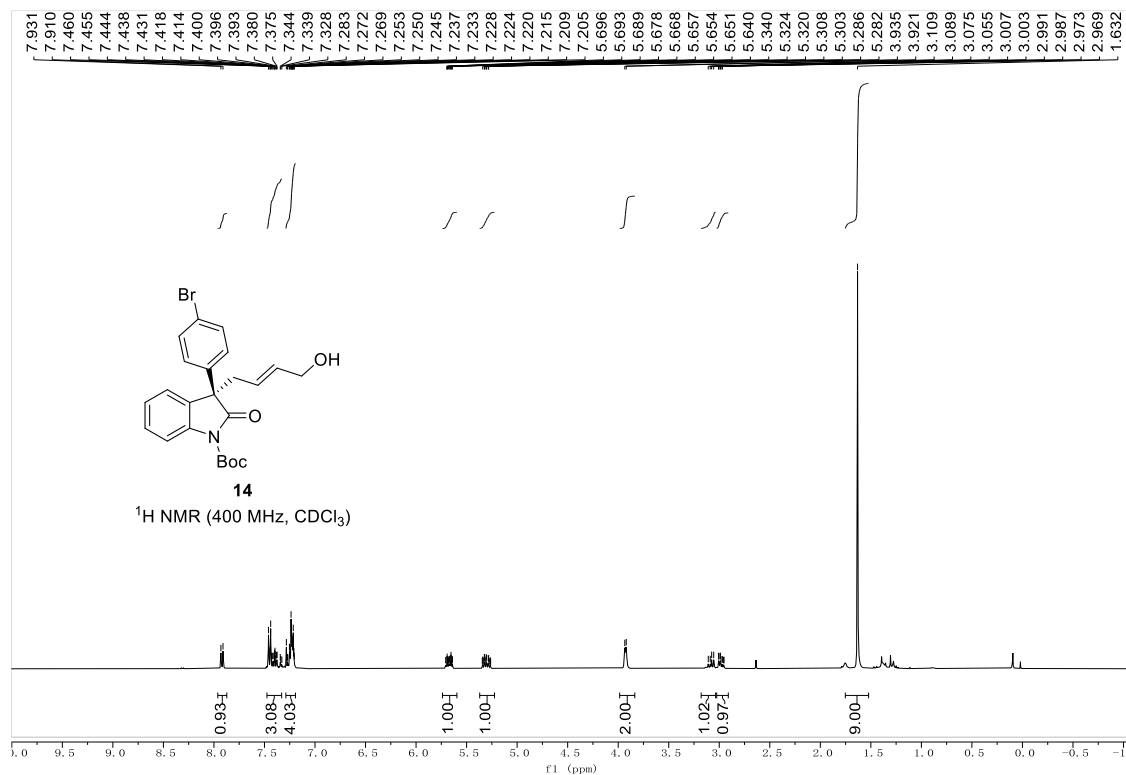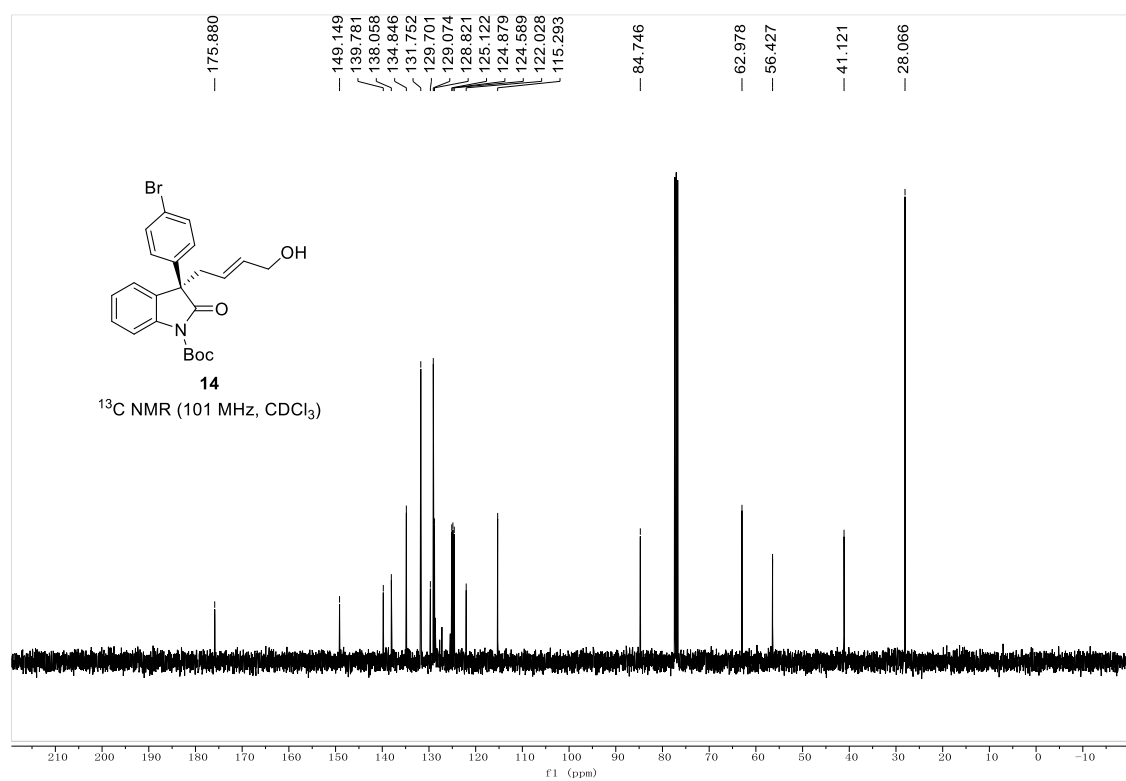

**tert-Butyl (R, E)-3-(3,5-dimethylphenyl)-3-(4-hydroxybut-2-en-1-yl)-2-oxindoline-1-carboxylate (15)**

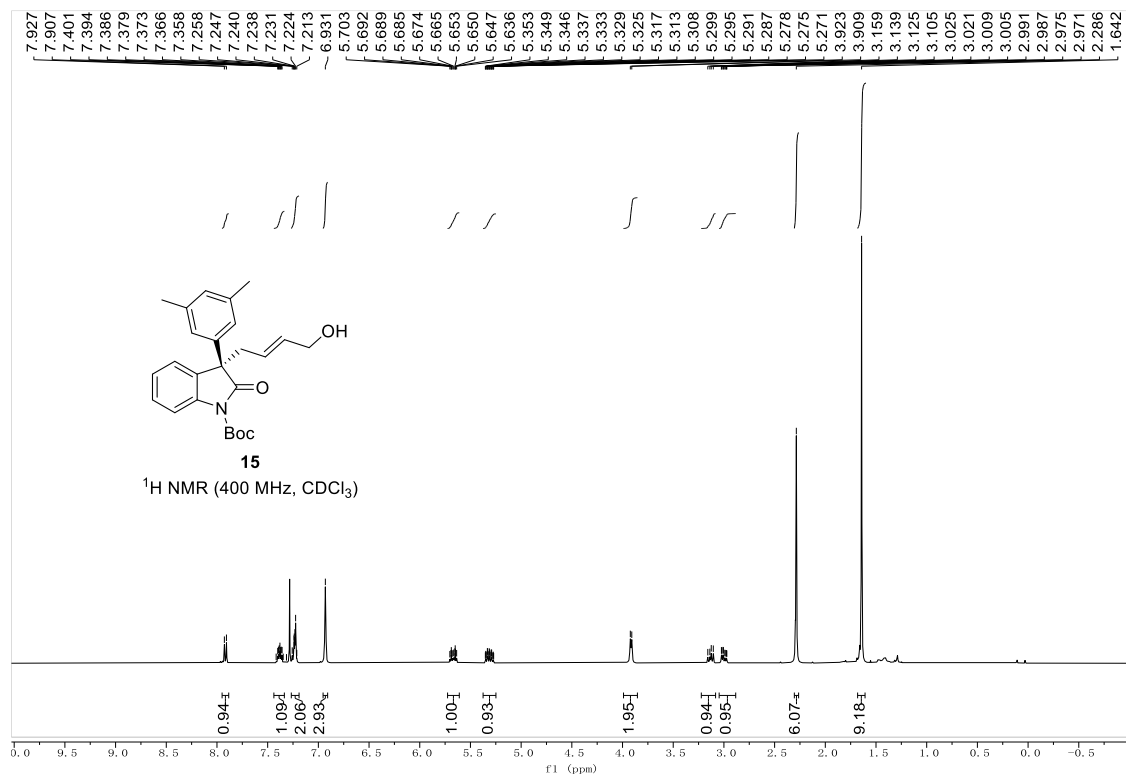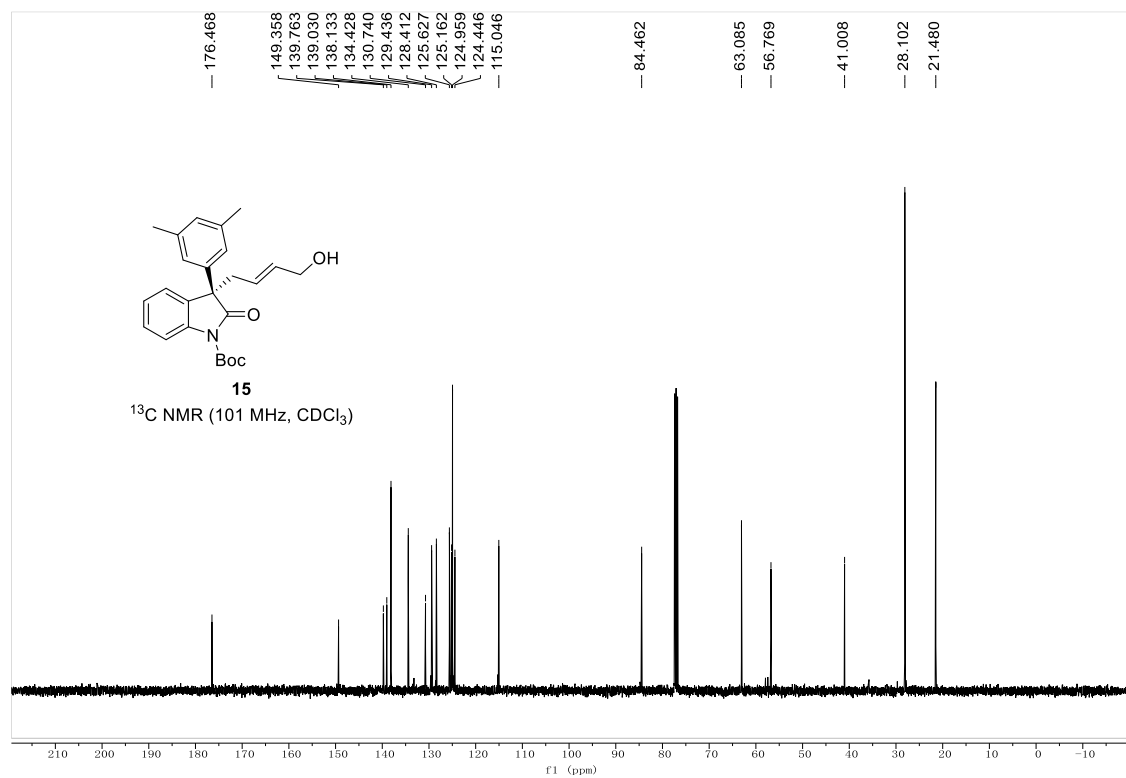



***tert*-Butyl (*R, E*)-3-(4-hydroxybut-2-en-1-yl)-3-(naphthalen-2-yl)-2-oxindoline-1-carboxylate**

**(16)**

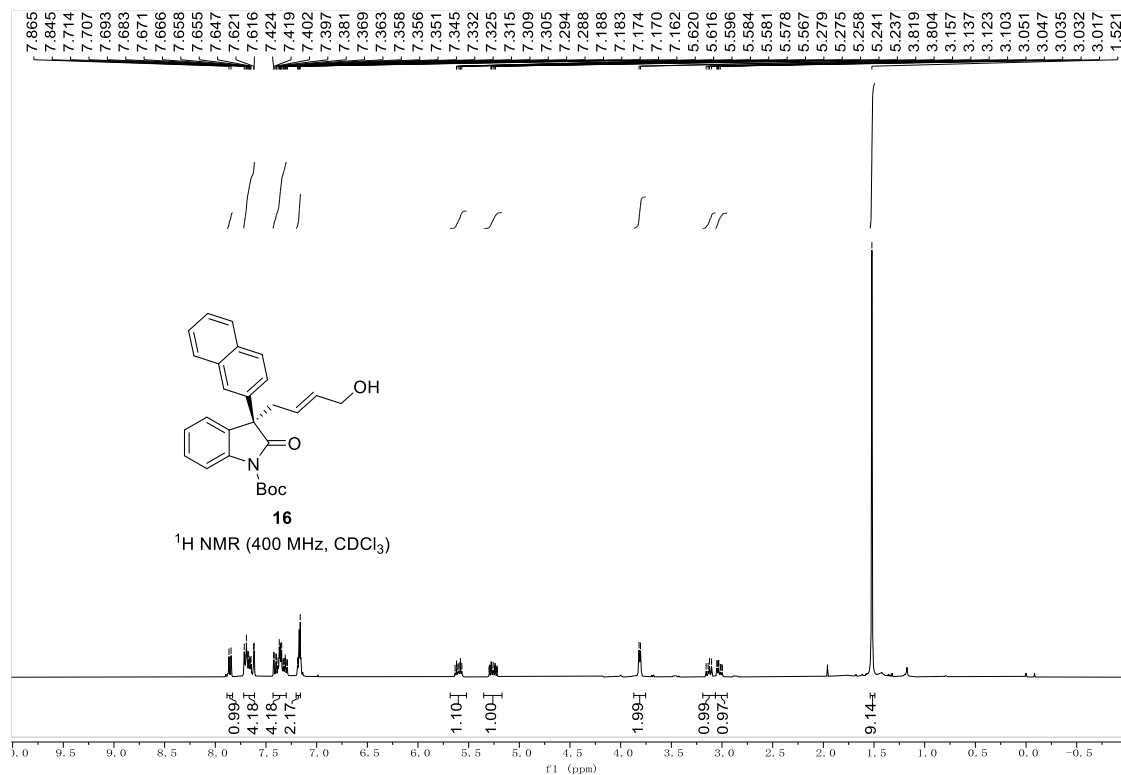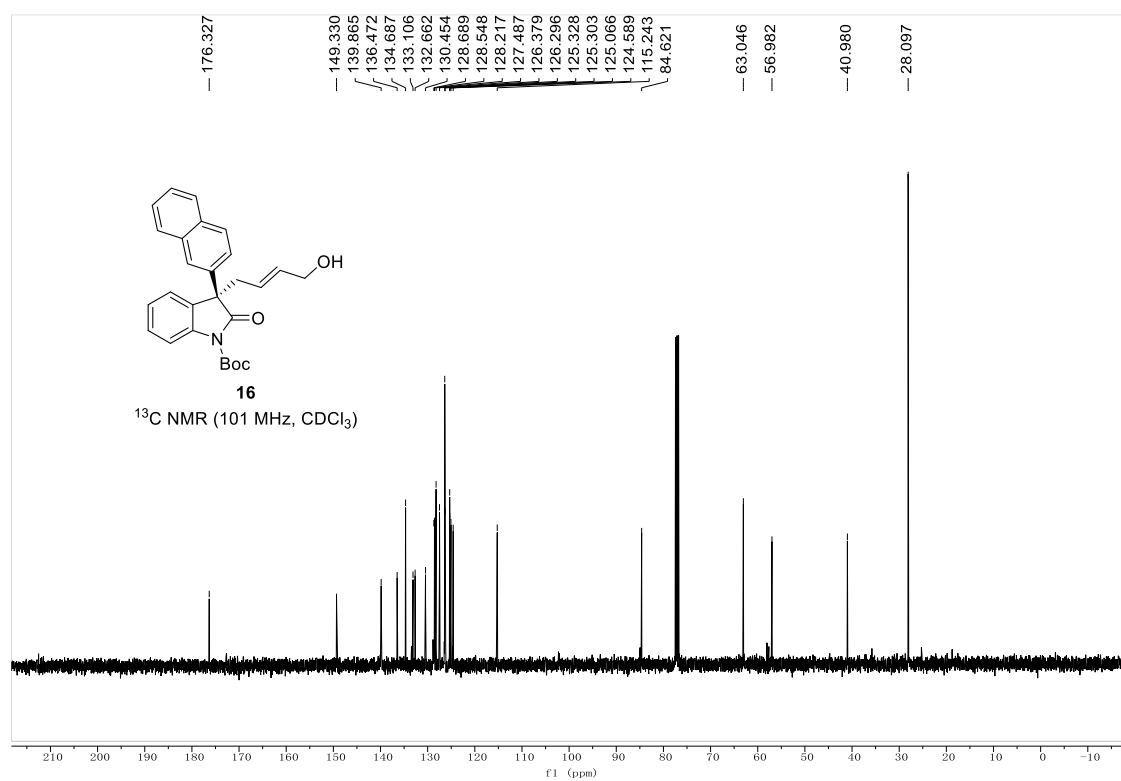

**tert-Butyl (R, E)-3-(4-hydroxybut-2-en-1-yl)-5-methoxy-2-oxo-3-phenylindoline-1-carboxylate (17)**

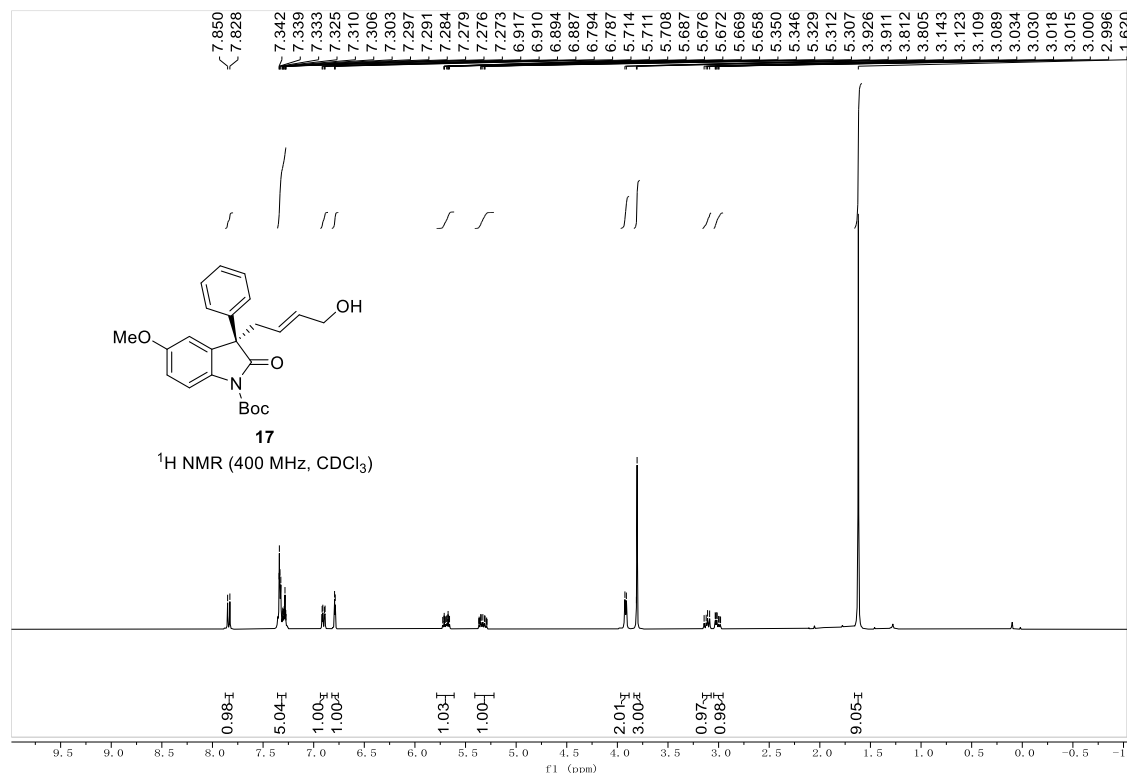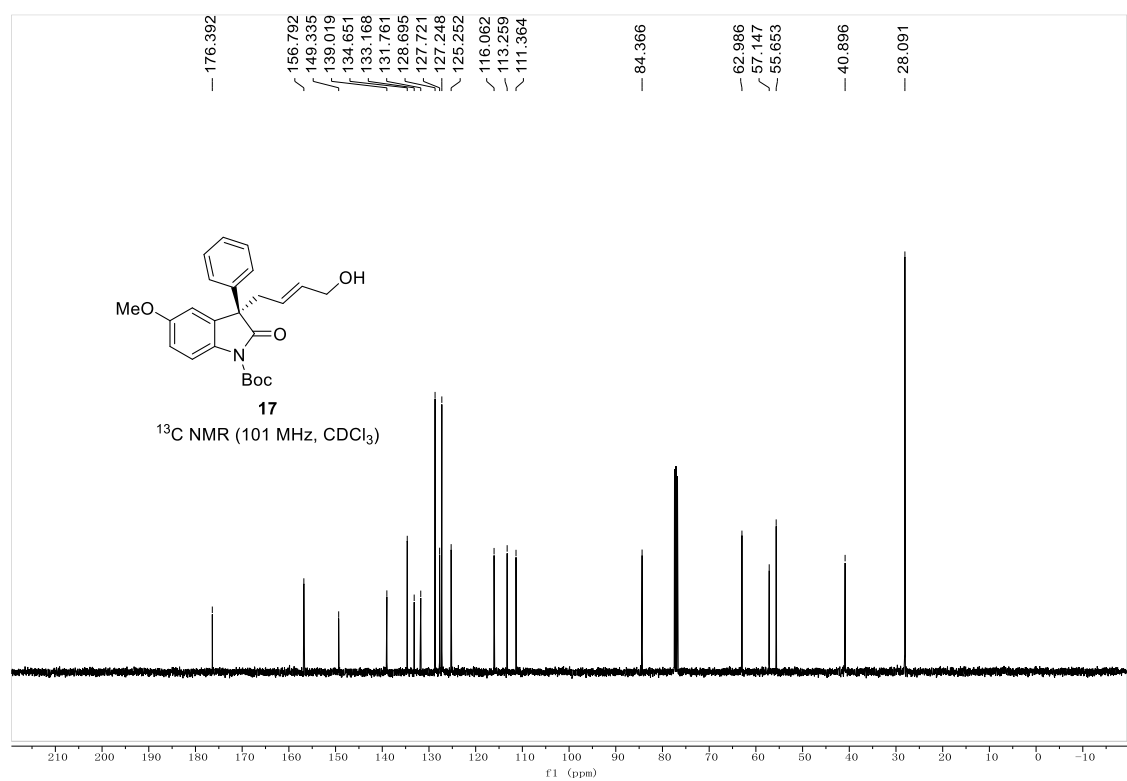

**tert-Butyl (R, E)-3-(4-hydroxybut-2-en-1-yl)-5-methyl-2-oxo-3-phenylindoline-1-carboxylate**

**(18)**

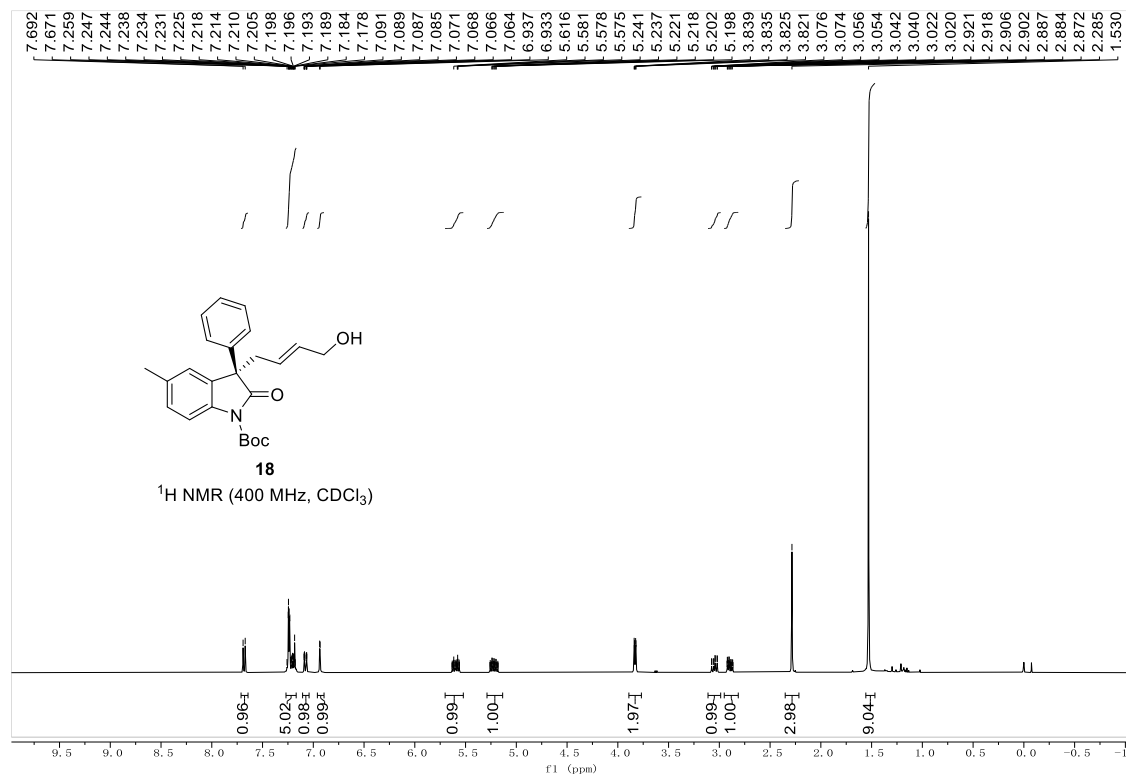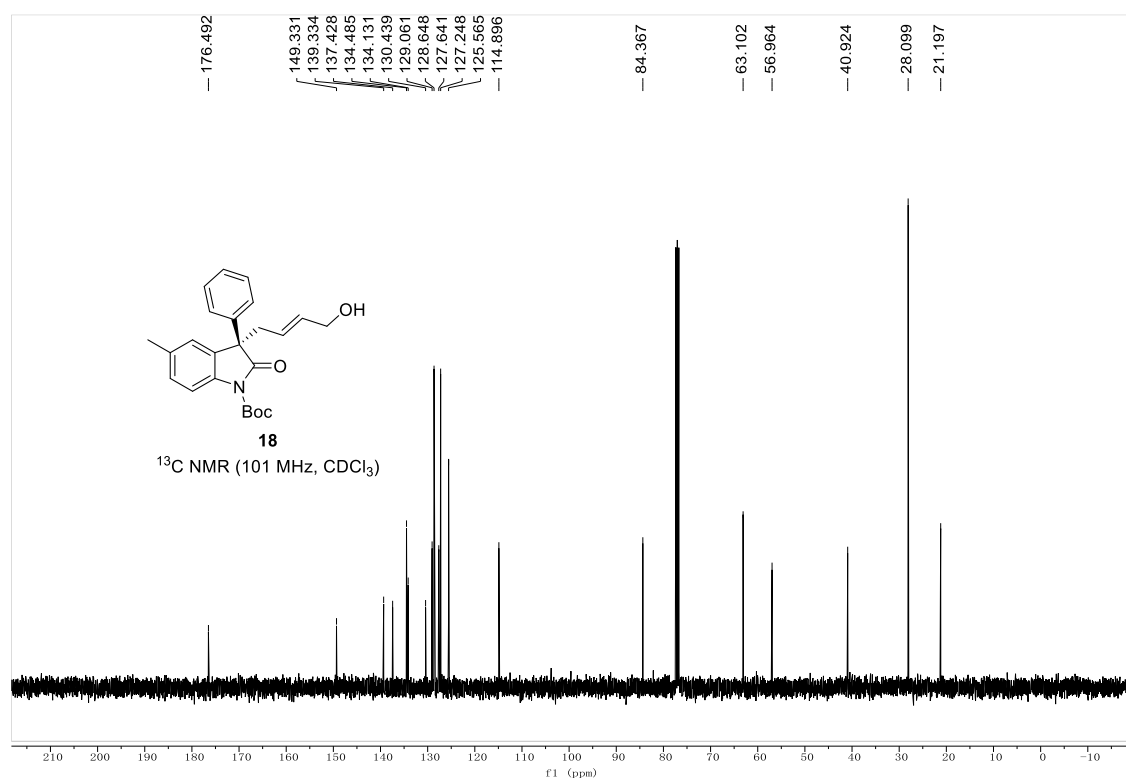

***tert*-Butyl (*R, E*)-5-fluoro-3-(4-hydroxybut-2-en-1-yl)-2-oxo-3-phenylindoline-1-carboxylate**

**(19)**

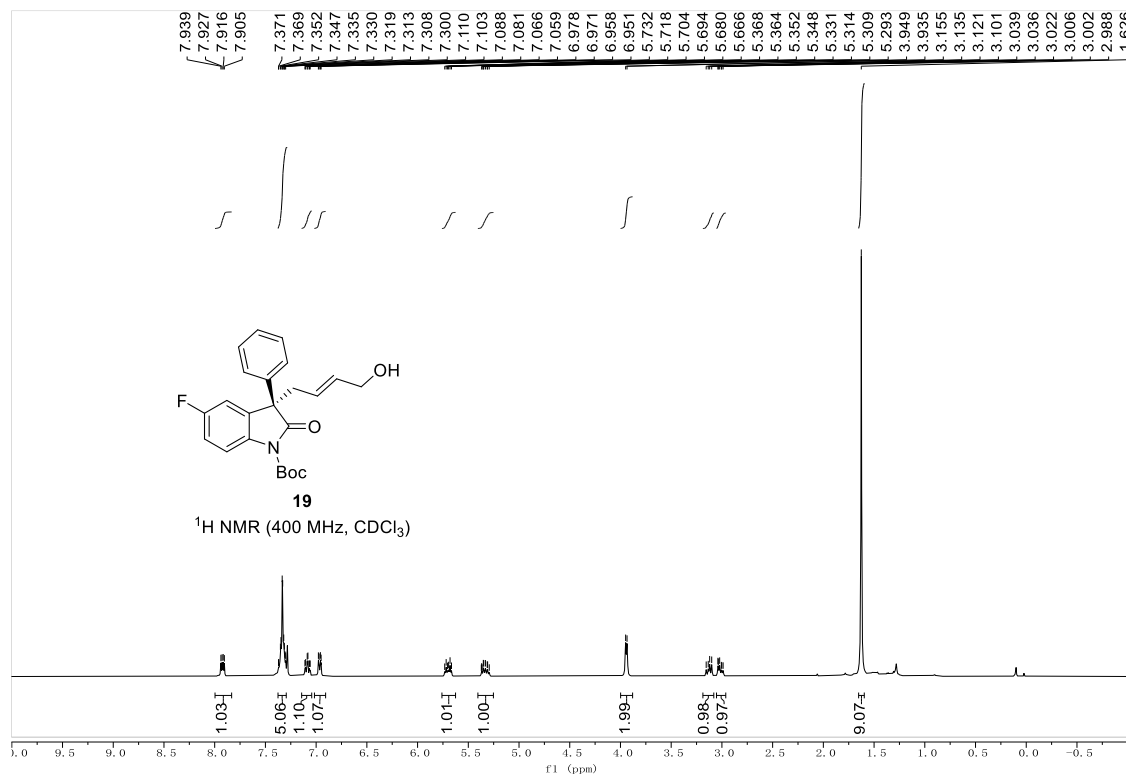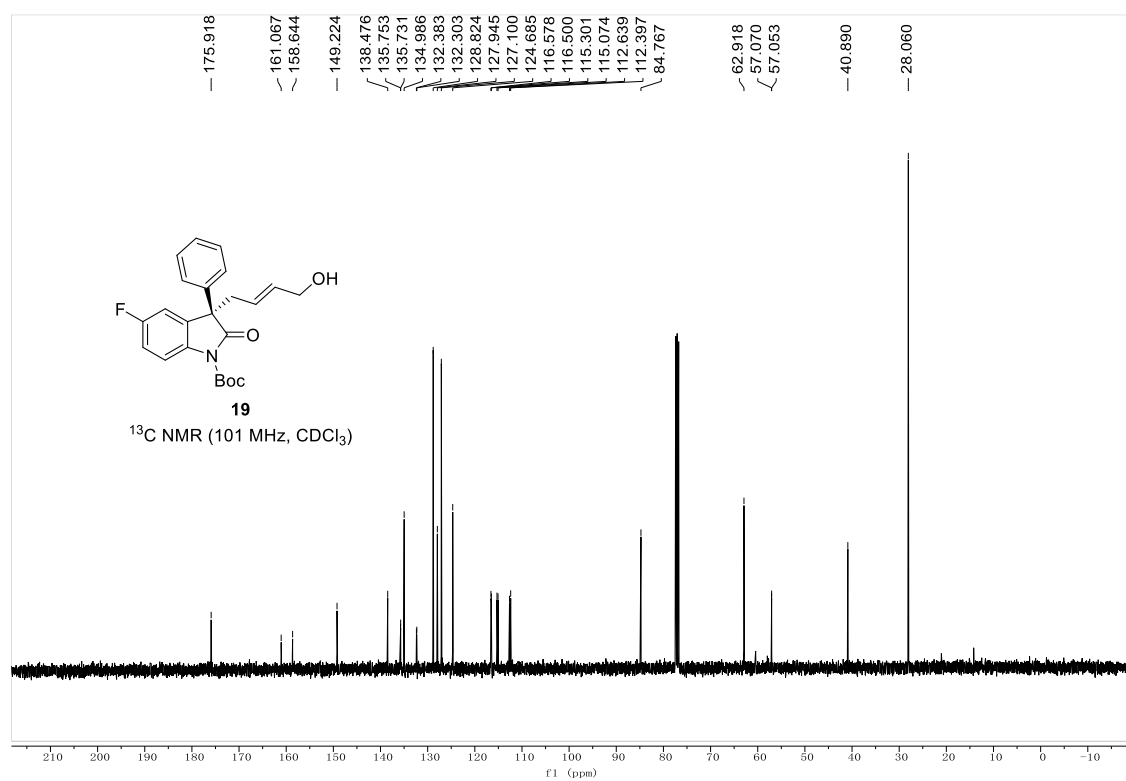

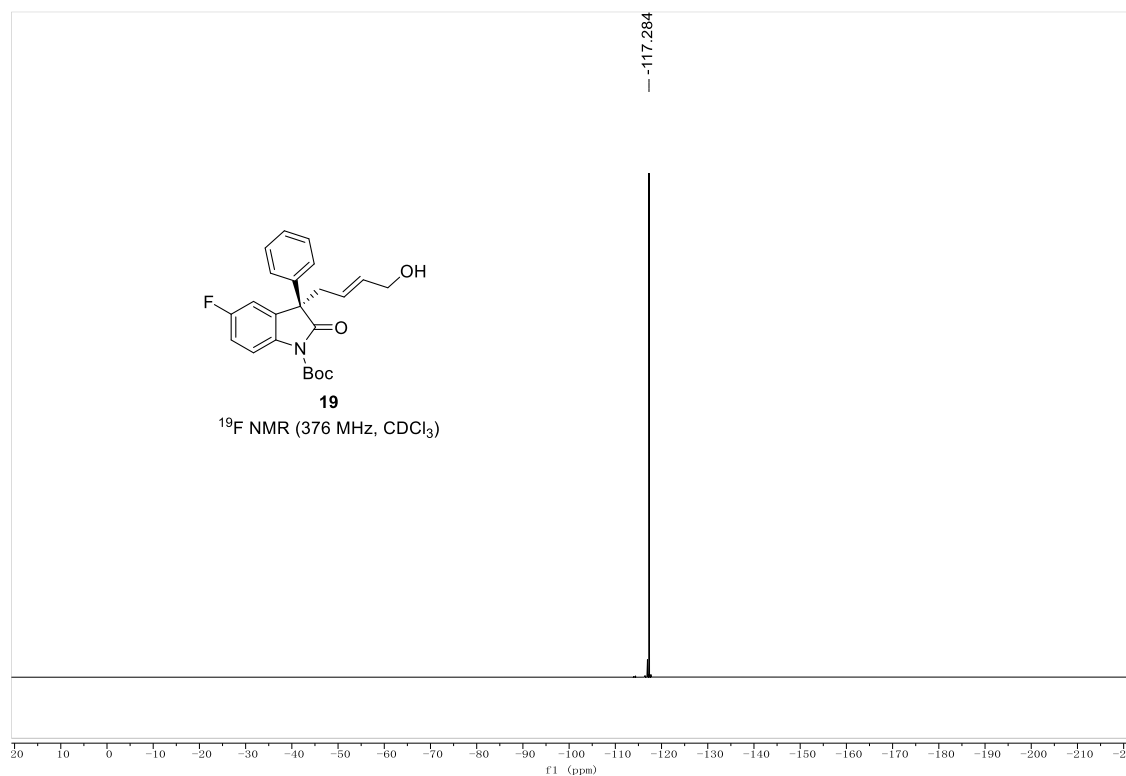

***tert*-Butyl (R, E)-5-chloro-3-(4-hydroxybut-2-en-1-yl)-2-oxo-3-phenylindoline-1-carboxylate**

**(20)**

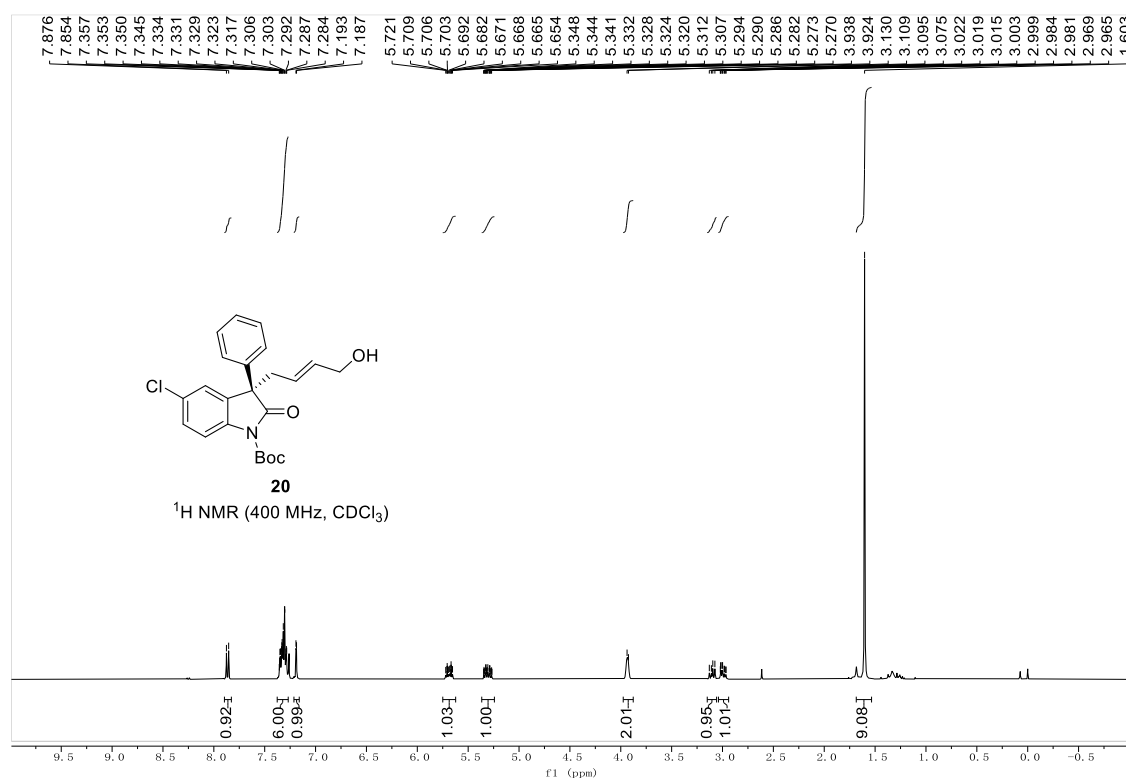

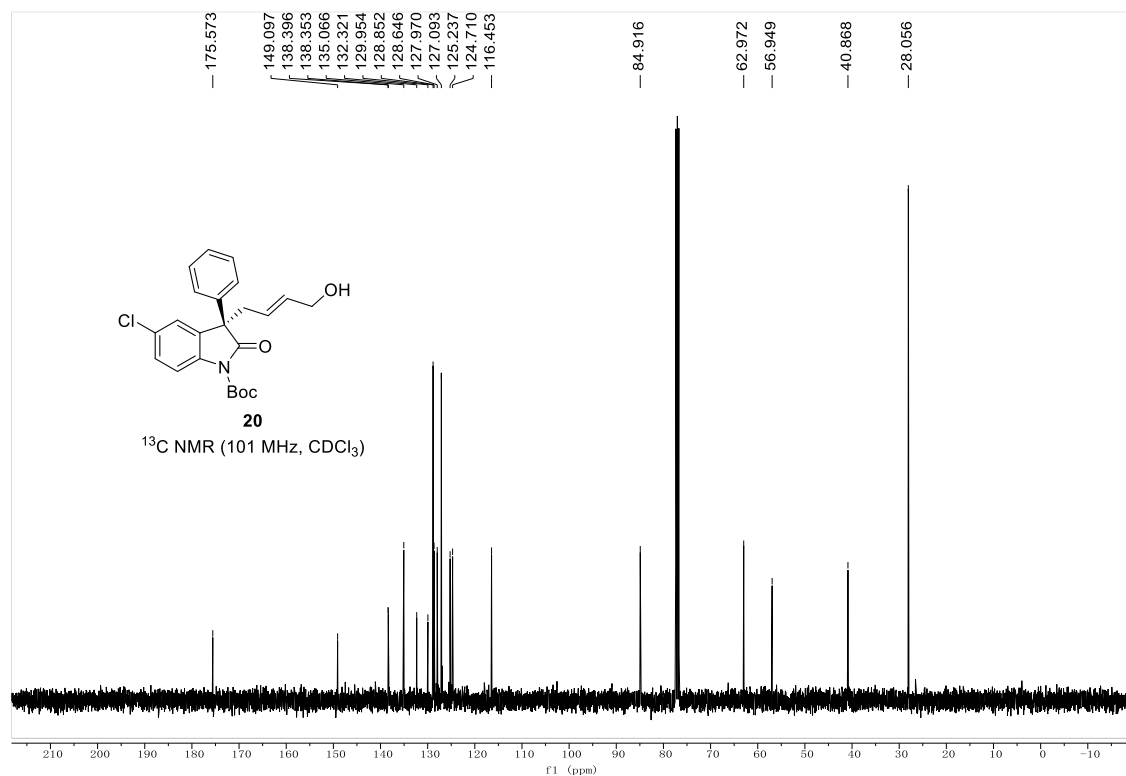

**tert-Butyl (R,E)-5-bromo-3-(4-hydroxybut-2-en-1-yl)-2-oxo-3-phenylindoline-1-carboxylate**

**(21)**

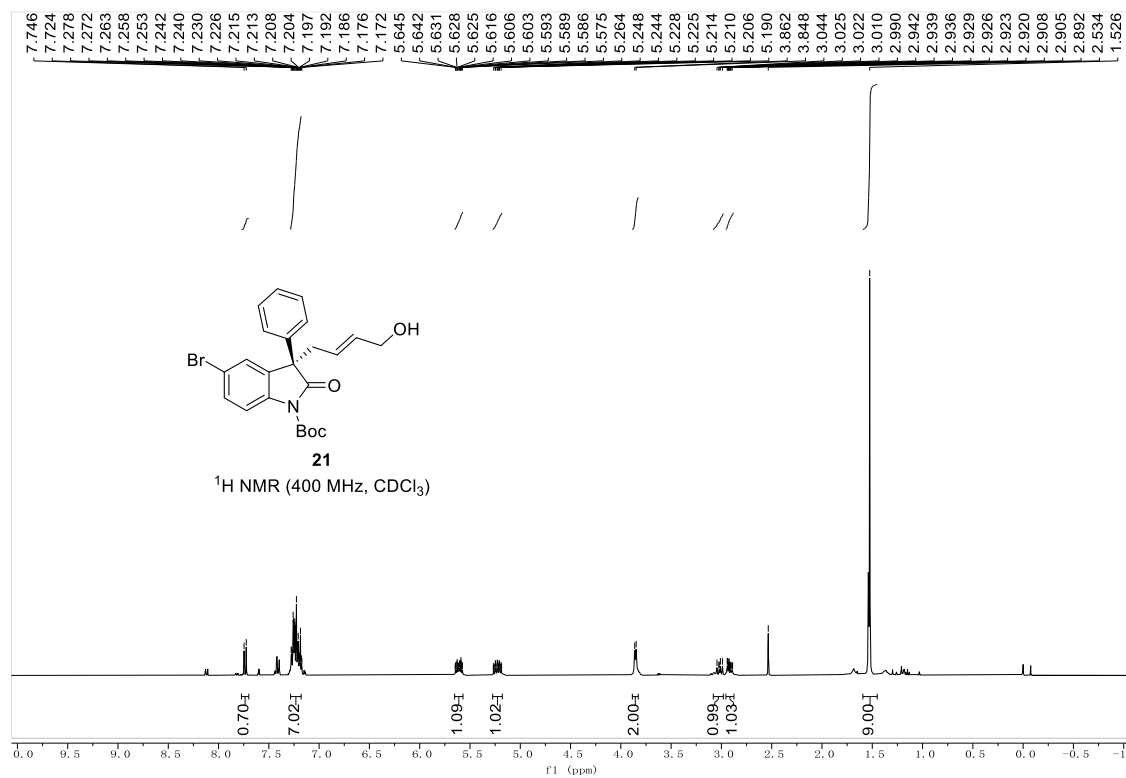

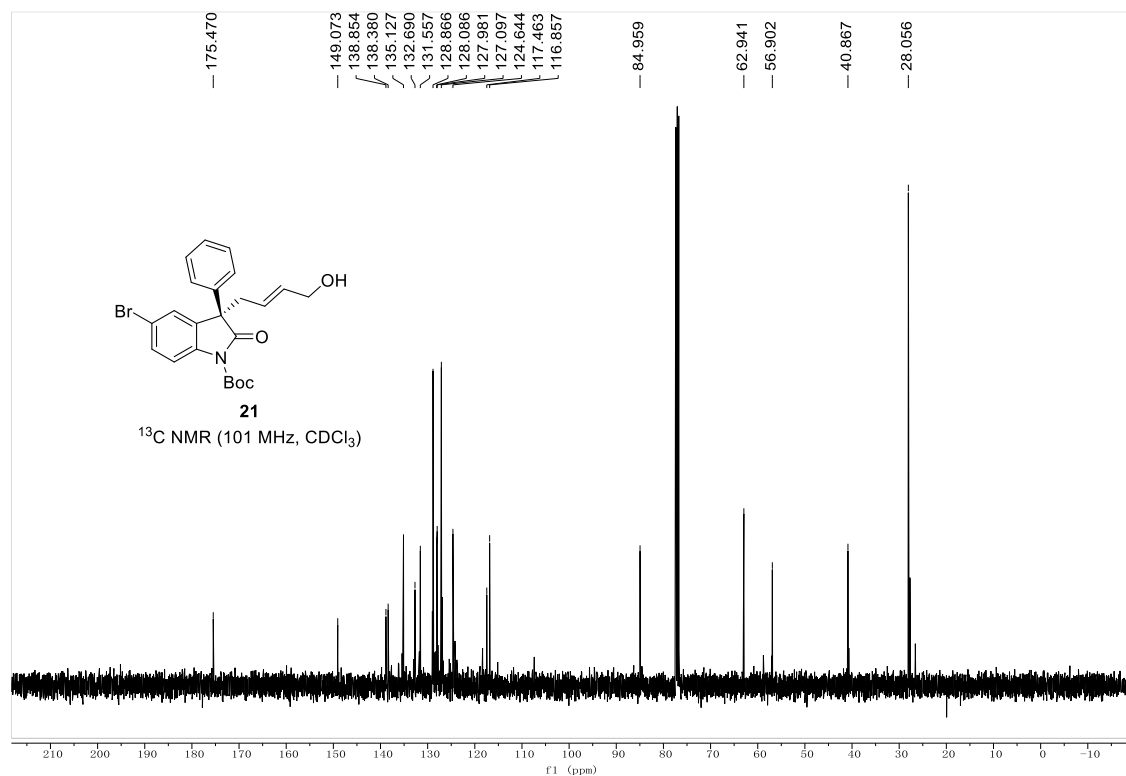

**tert-Butyl (R, E)-3-(4-hydroxybut-2-en-1-yl)-6-methoxy-2-oxo-3-phenylindoline-1-carboxylate (22)**

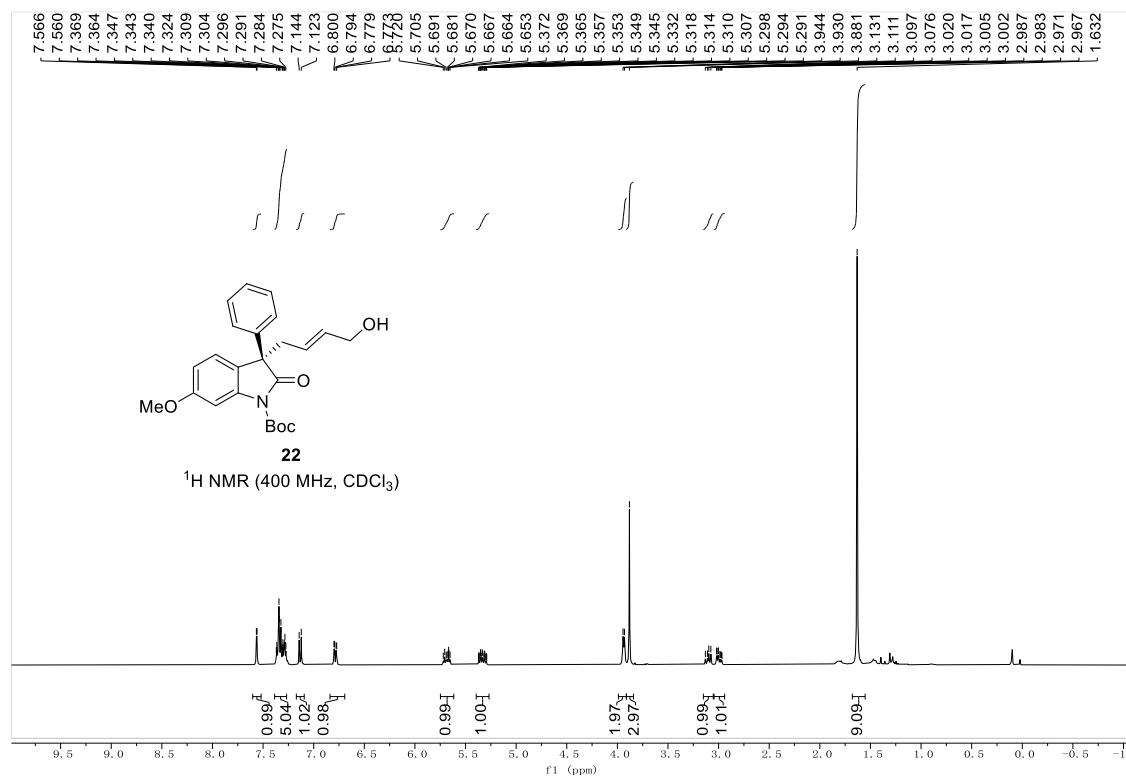

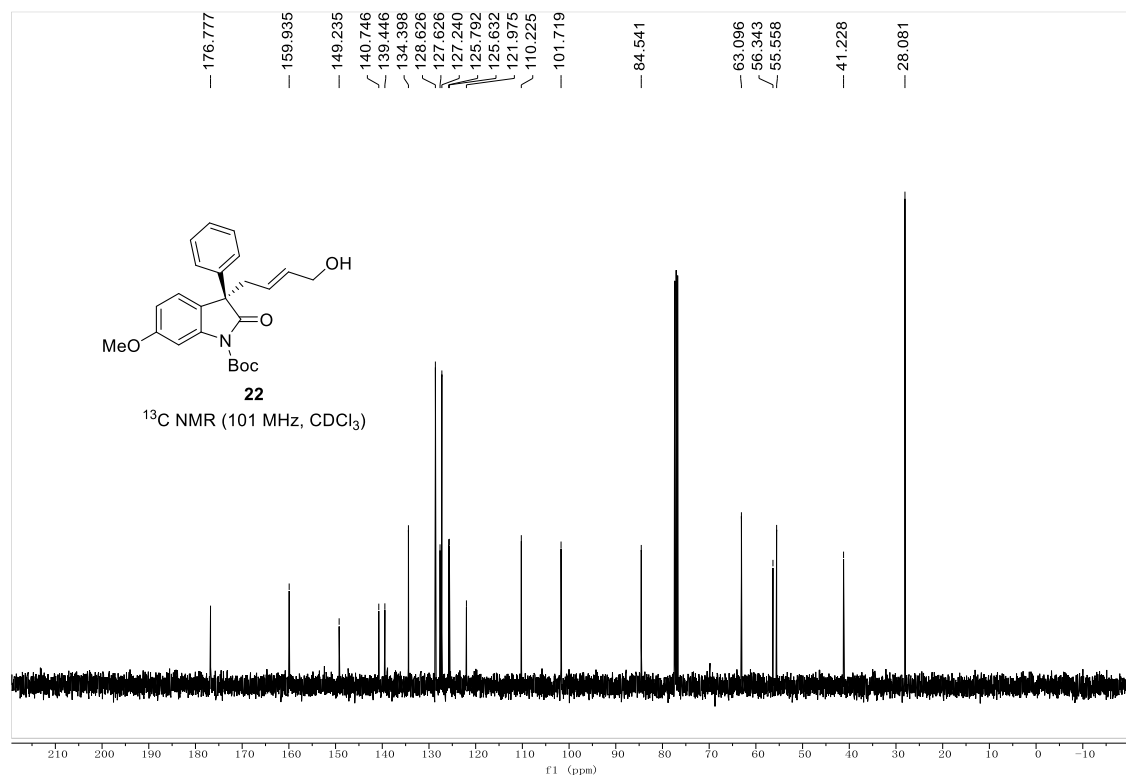

**tert-Butyl (R,E)-6-fluoro-3-(4-hydroxybut-2-en-1-yl)-2-oxo-3-phenylindoline-1-carboxylate**

(**23**)

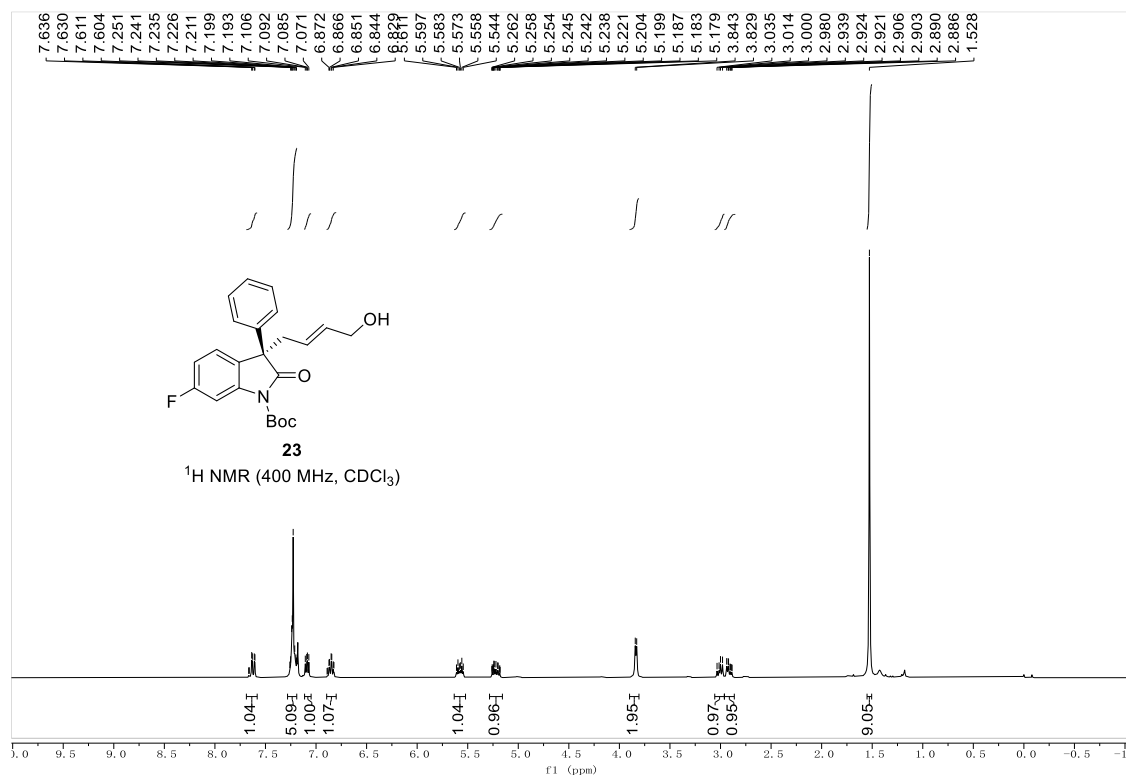



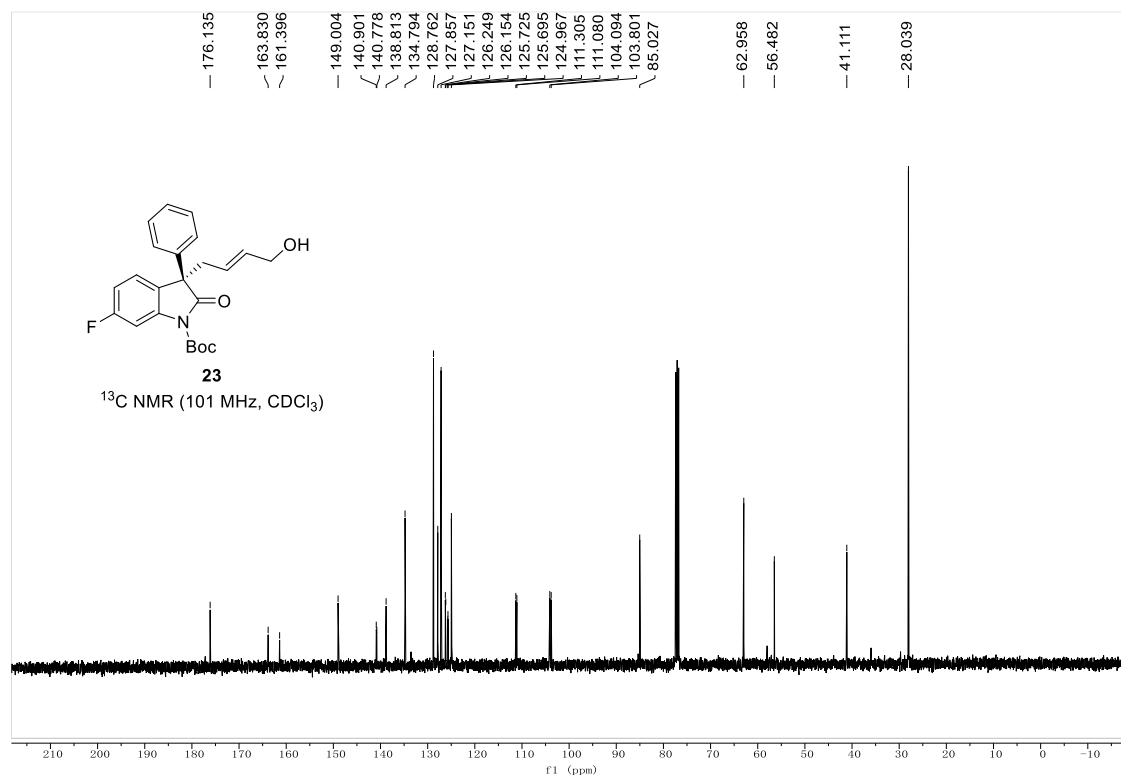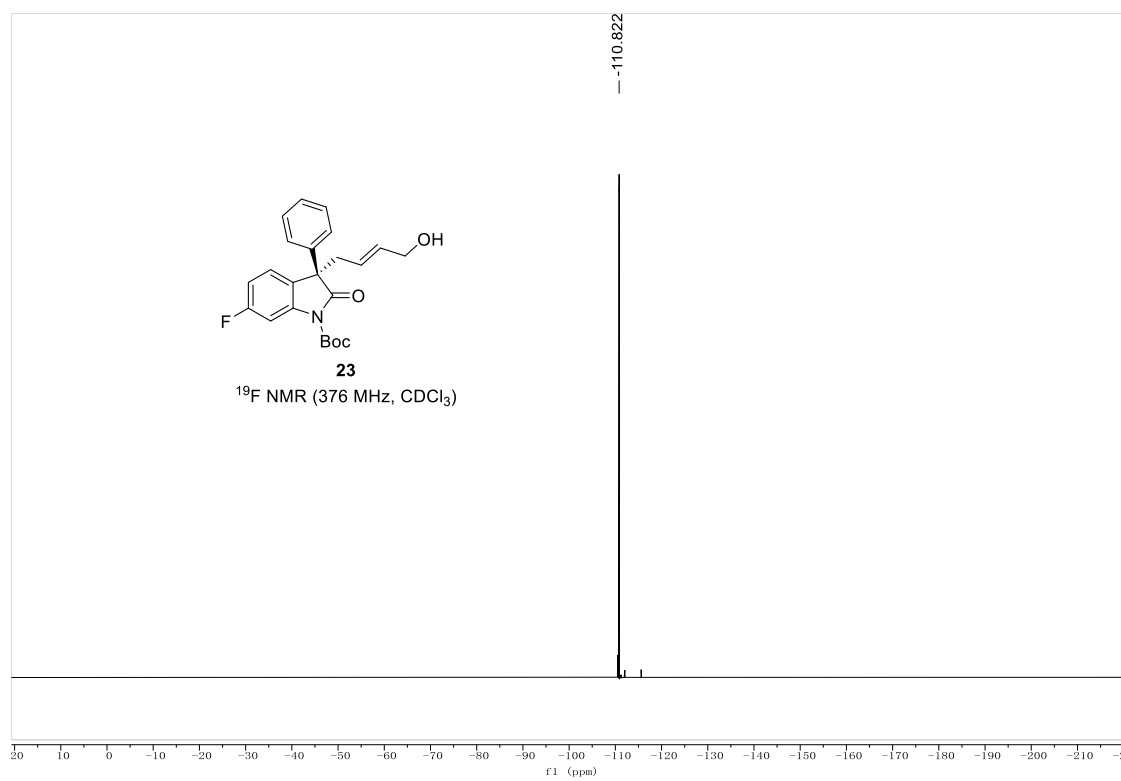

**tert-Butyl (R, E)-6-chloro-3-(4-hydroxybut-2-en-1-yl)-2-oxo-3-phenylindoline-1-carboxylate**

**(24)**

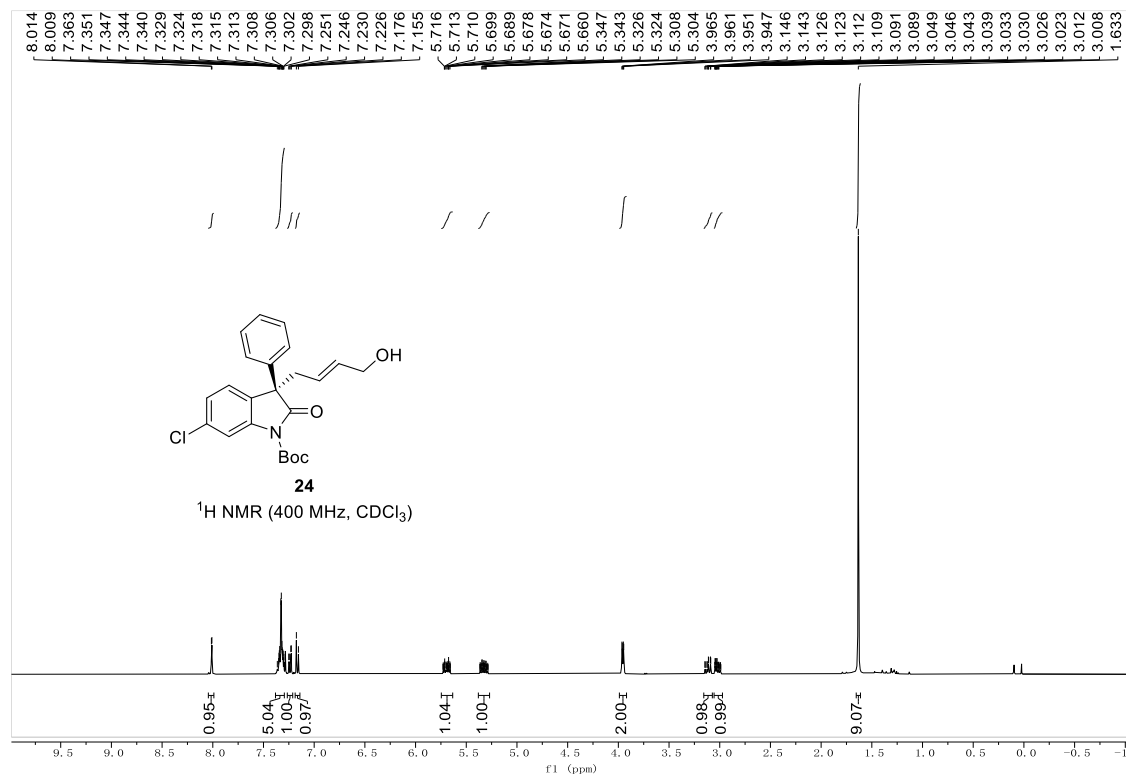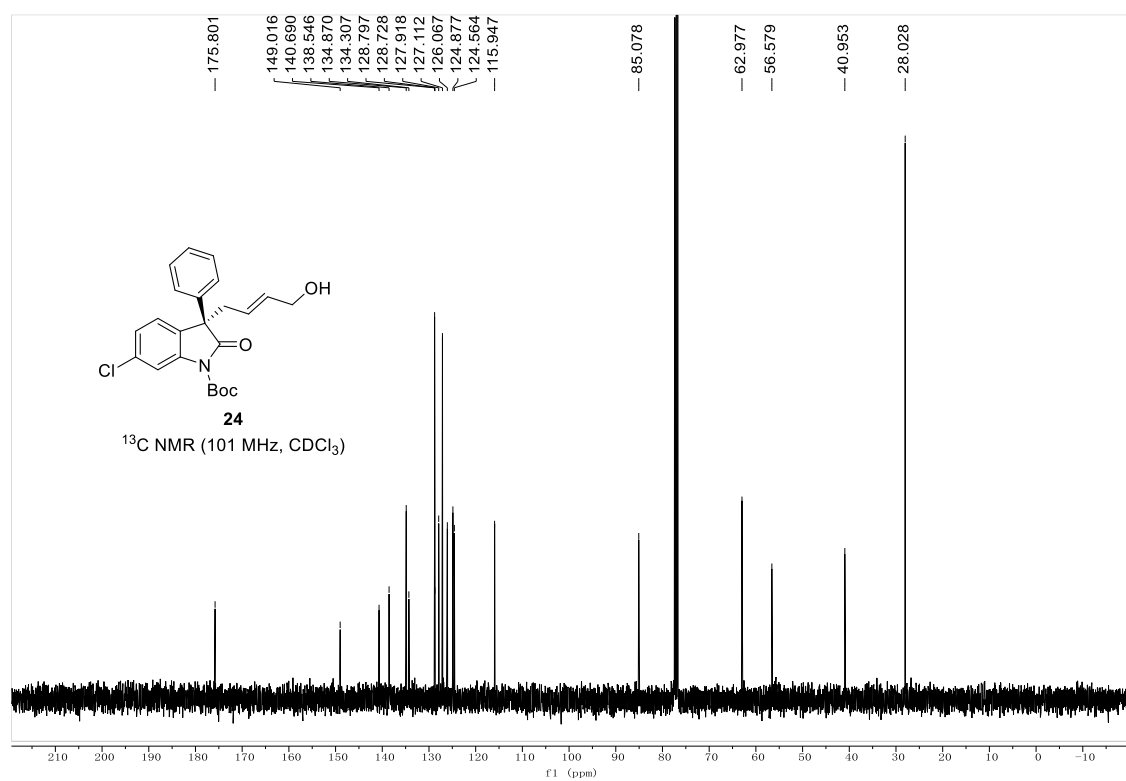

**tert-Butyl (R, E)-6-bromo-3-(4-hydroxybut-2-en-1-yl)-2-oxo-3-phenylindoline-1-carboxylate**

**(25)**

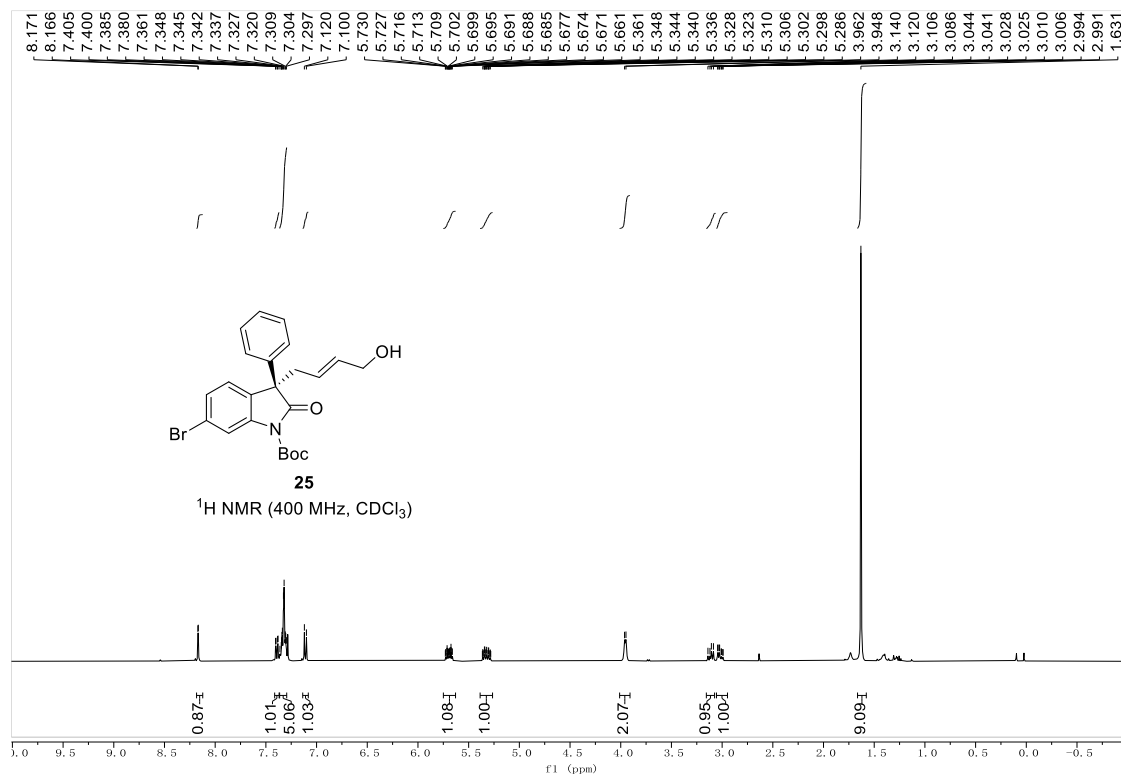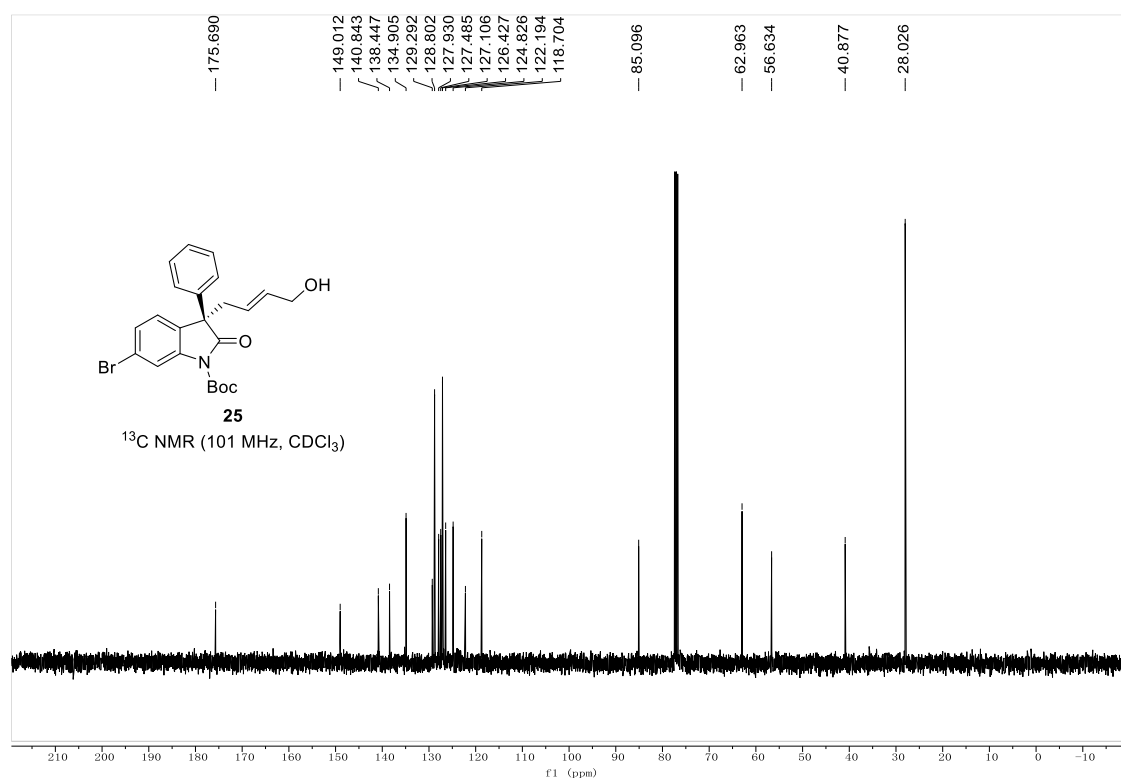

**(*R, E*)-4-(1-Methyl-3-phenylindolin-3-yl)but-2-en-1-ol (26)**

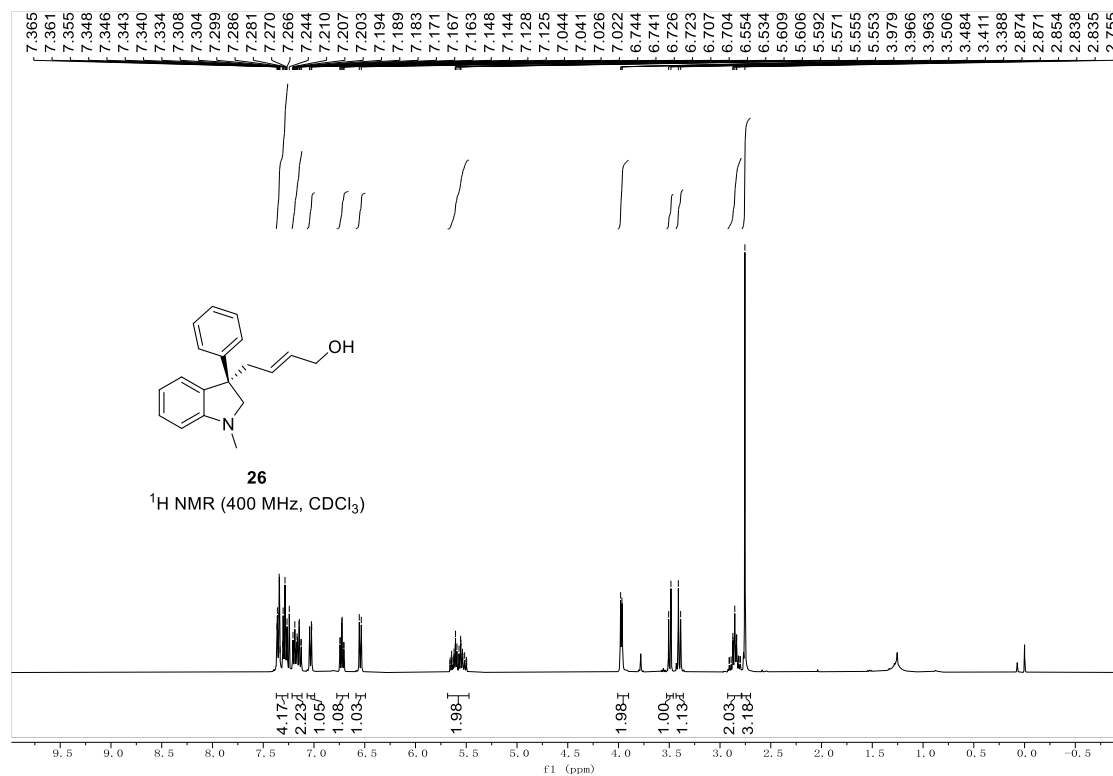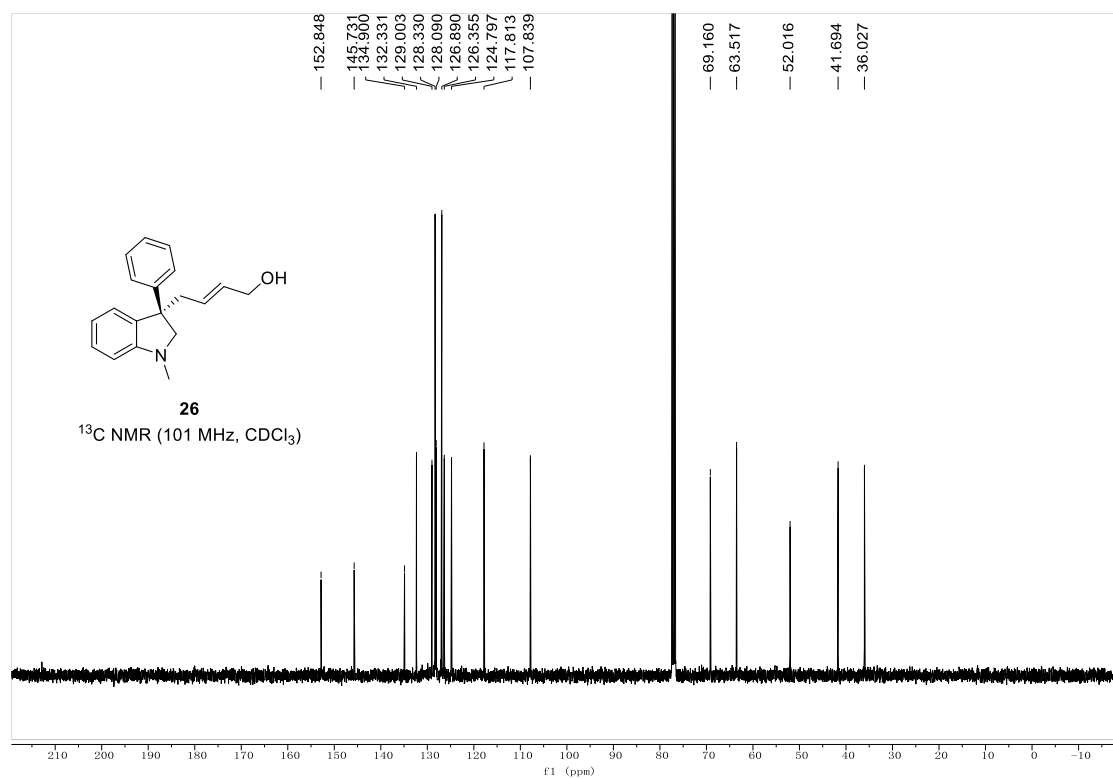

**tert-Butyl (R)-3-(4-hydroxybutyl)-2-oxo-3-phenylindoline-1-carboxylate (27)**

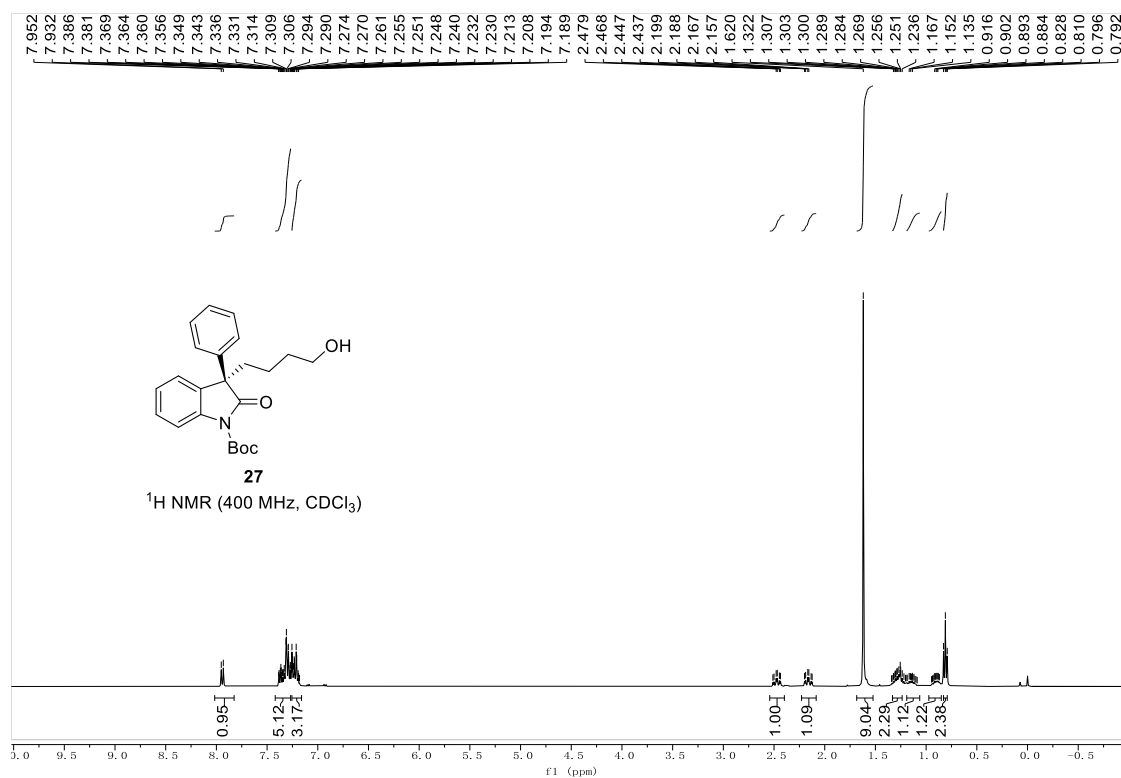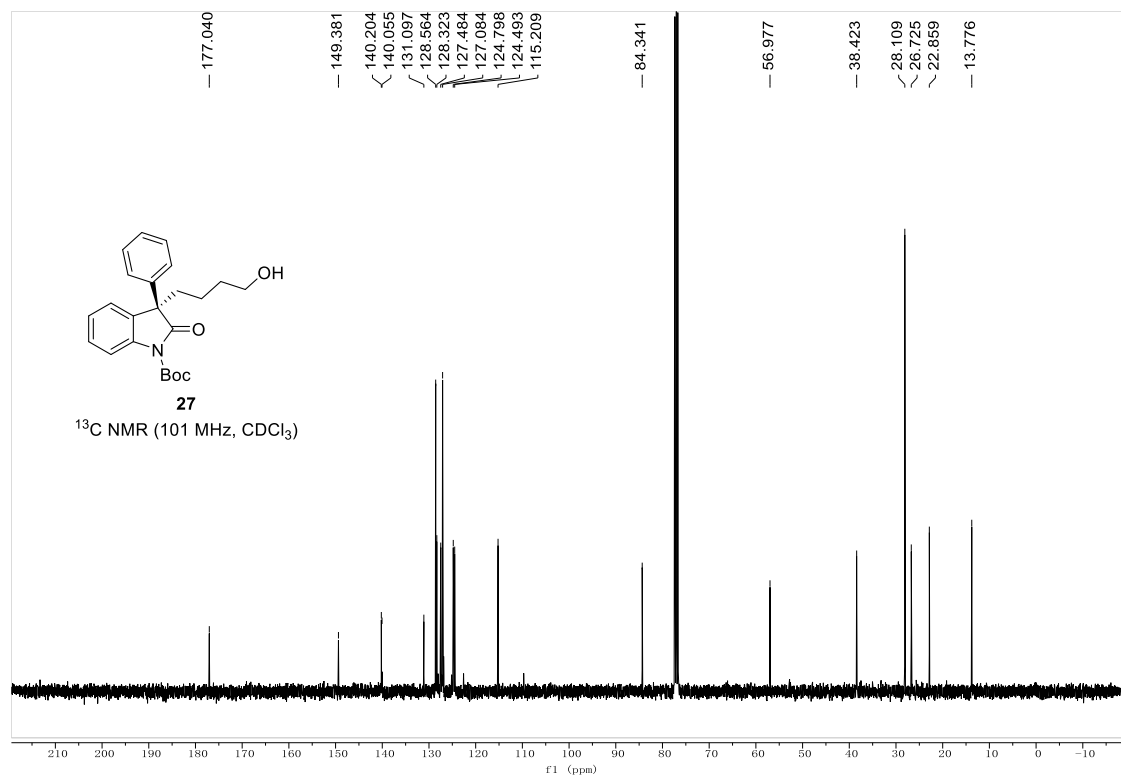

**(R, E)-3-(4-Hydroxybut-2-en-1-yl)-3-phenylindolin-2-one (28)**

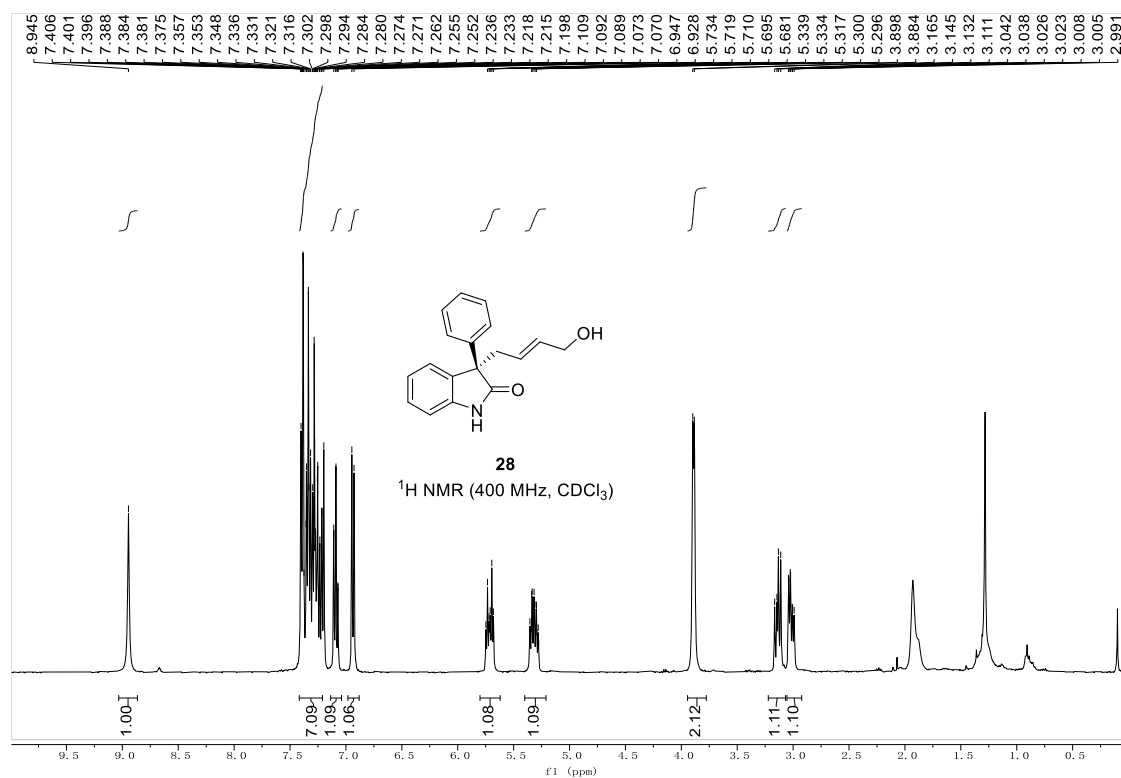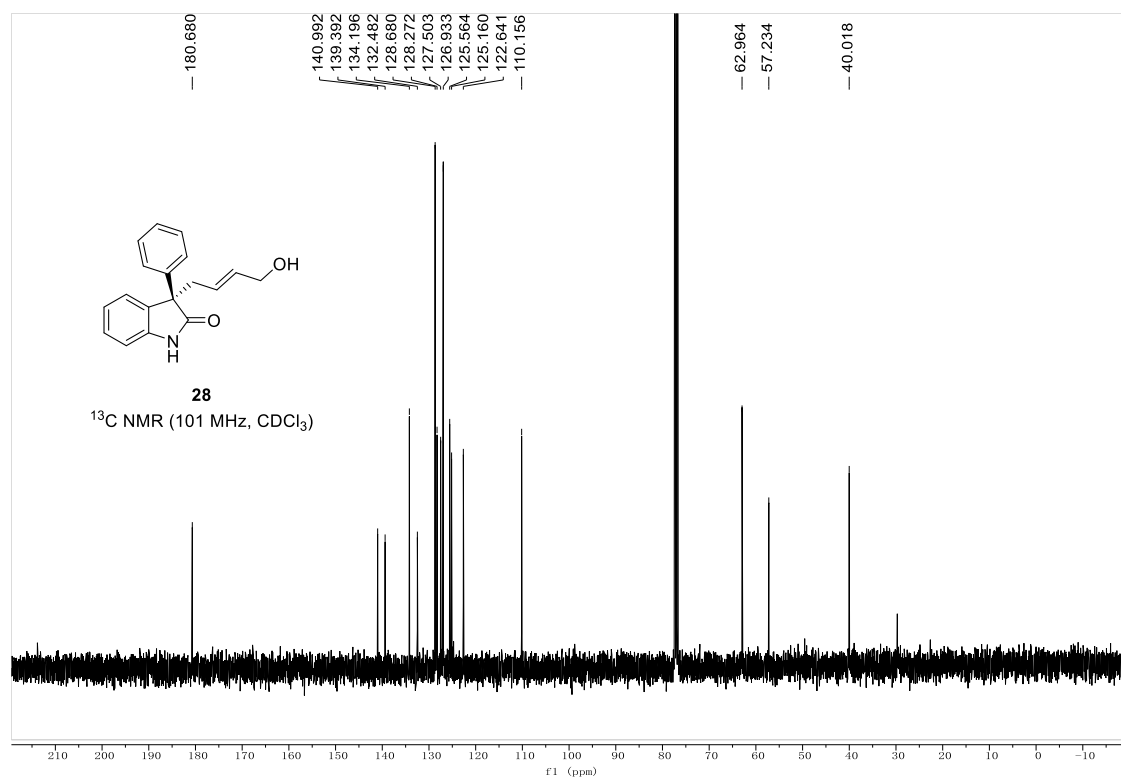



**tert-Butyl 2-((S)-2-oxo-3-(((E)-4-((R)-2-oxo-3-phenylindolin-3-yl)but-2-en-1-yl)amino)-2,3,4,5-tetrahydro-1H-benzo[b]azepin-1-yl)acetate (30)**

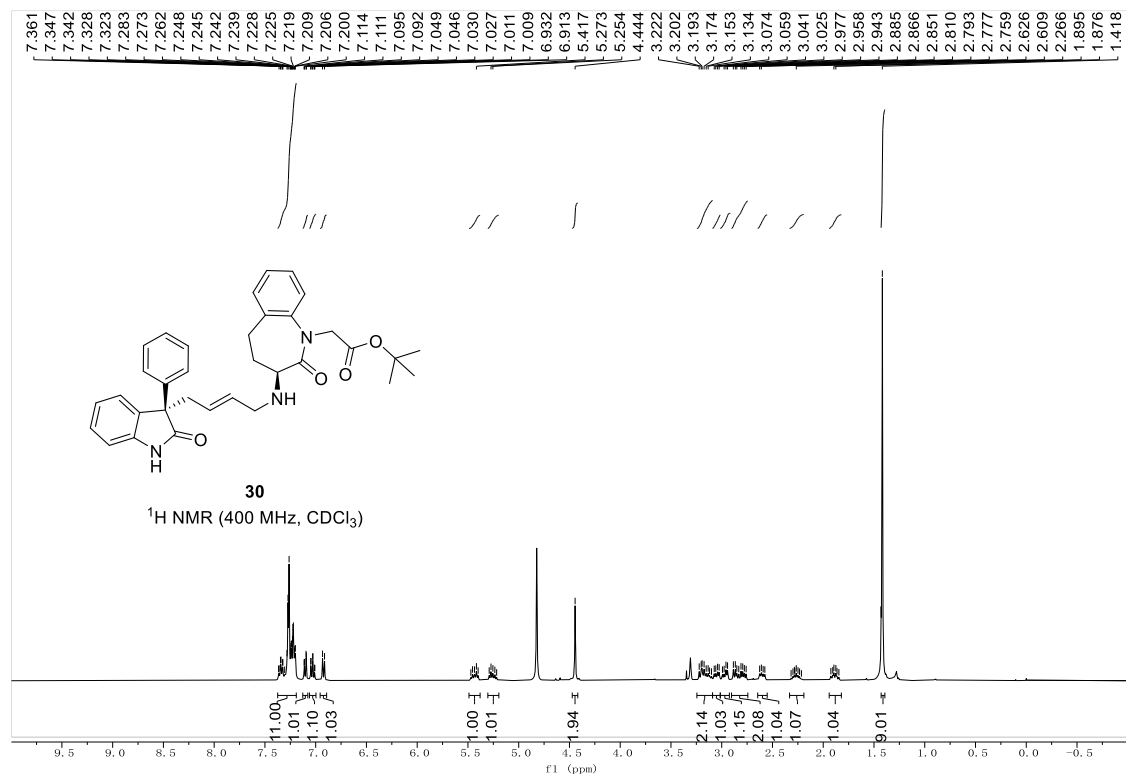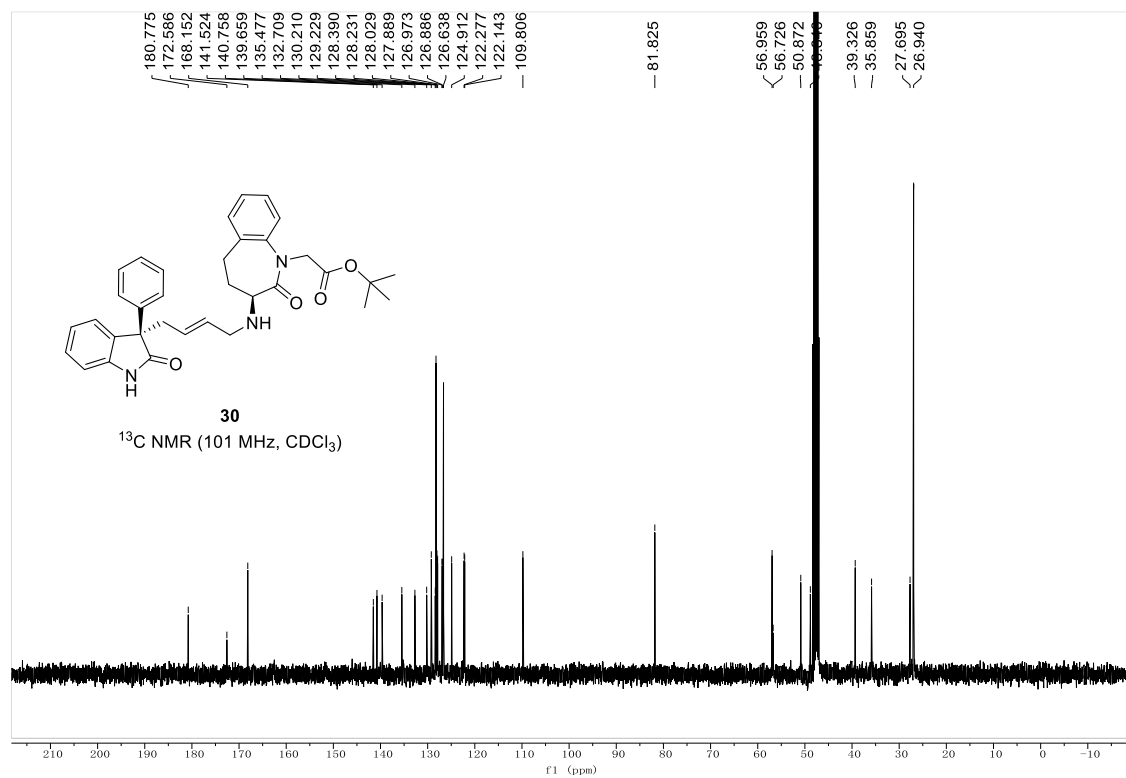



**(2*S*, 3*R*, 4*R*, 5*S*, 6*R*)-6-(Acetoxymethyl)-3-(bis(*E*)-4-((*R*)-2-oxo-3-phenylindolin-3-yl)but-2-en-1-yl)amino)tetrahydro-2*H*-pyran-2,4,5-triyl triacetate (**31**)**

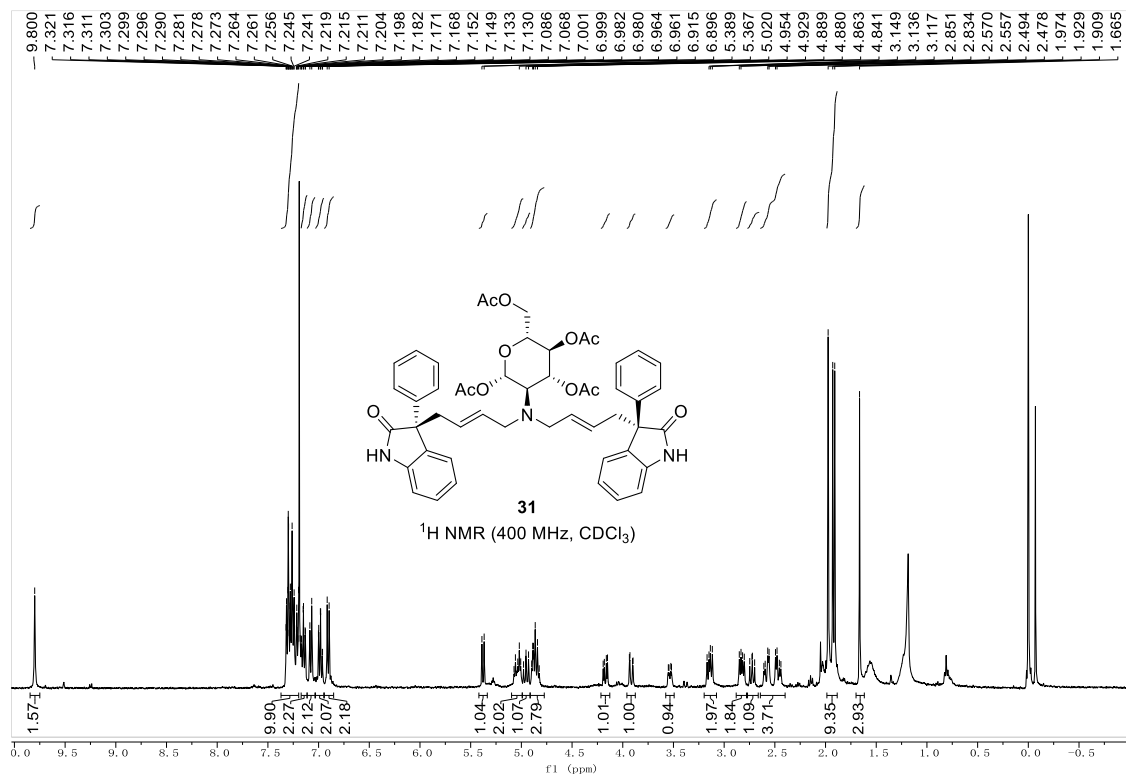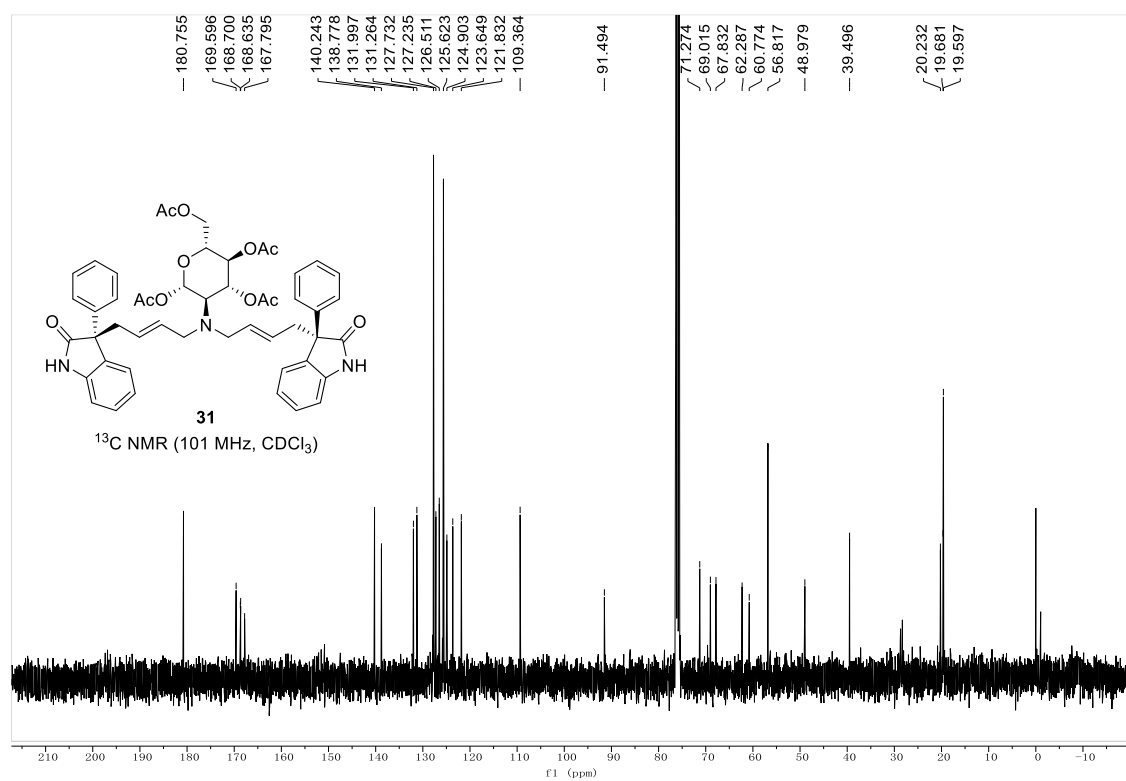

**2-(Diethylamino)ethyl (R, E)-4-((4-(2-oxo-3-phenylindolin-3-yl)but-2-en-1-yl)amino)benzoate**

**(32)**

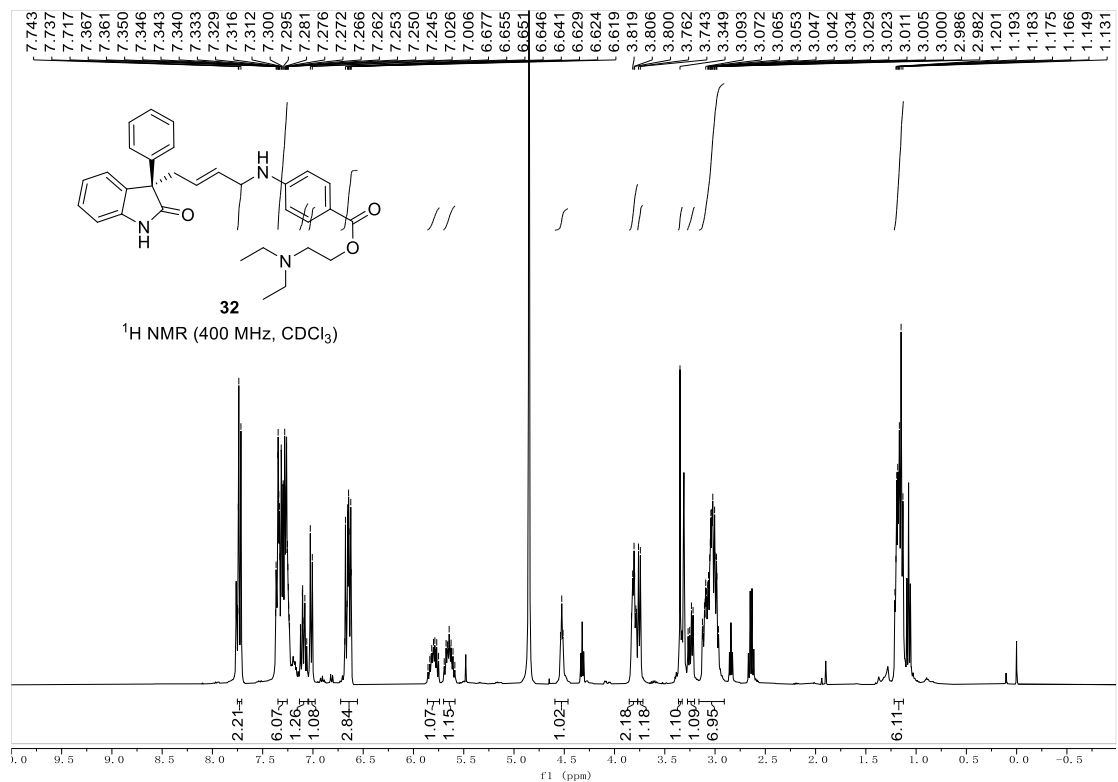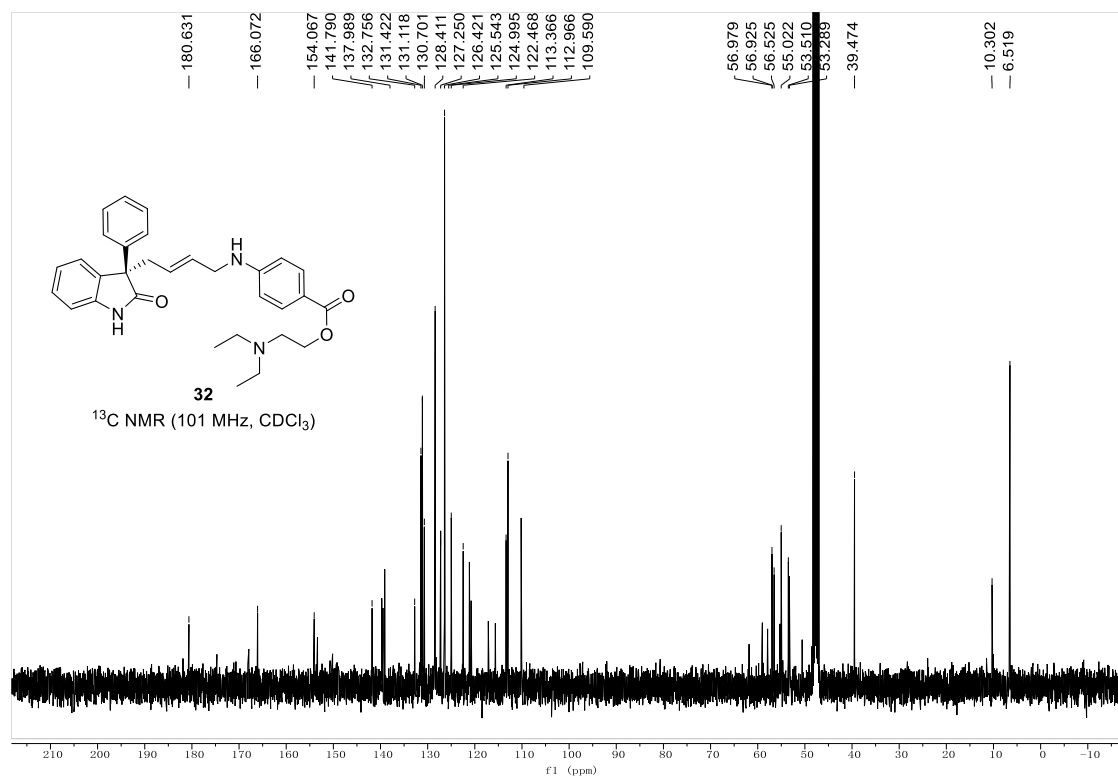

**(R)-1-((E)-4-((R)-2-oxo-3-Phenylindolin-3-yl)but-2-en-1-yl)pyrrolidine-2-carboxamide (33)**

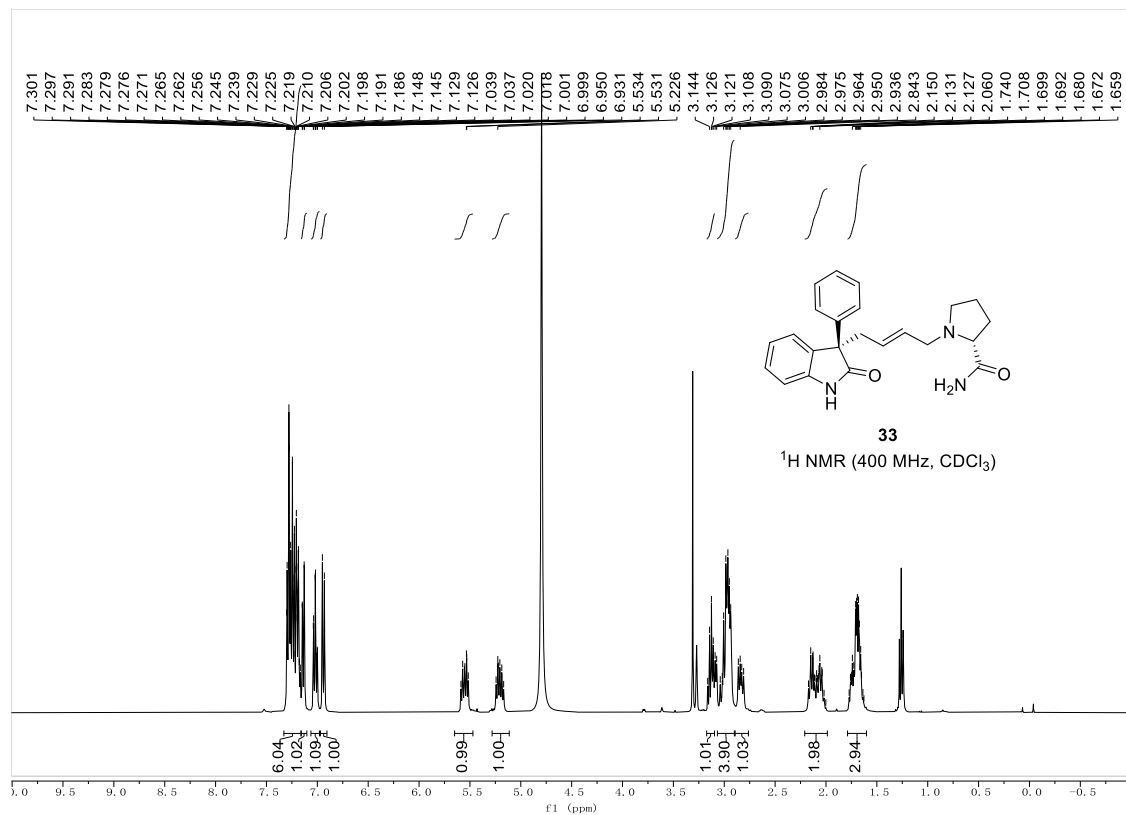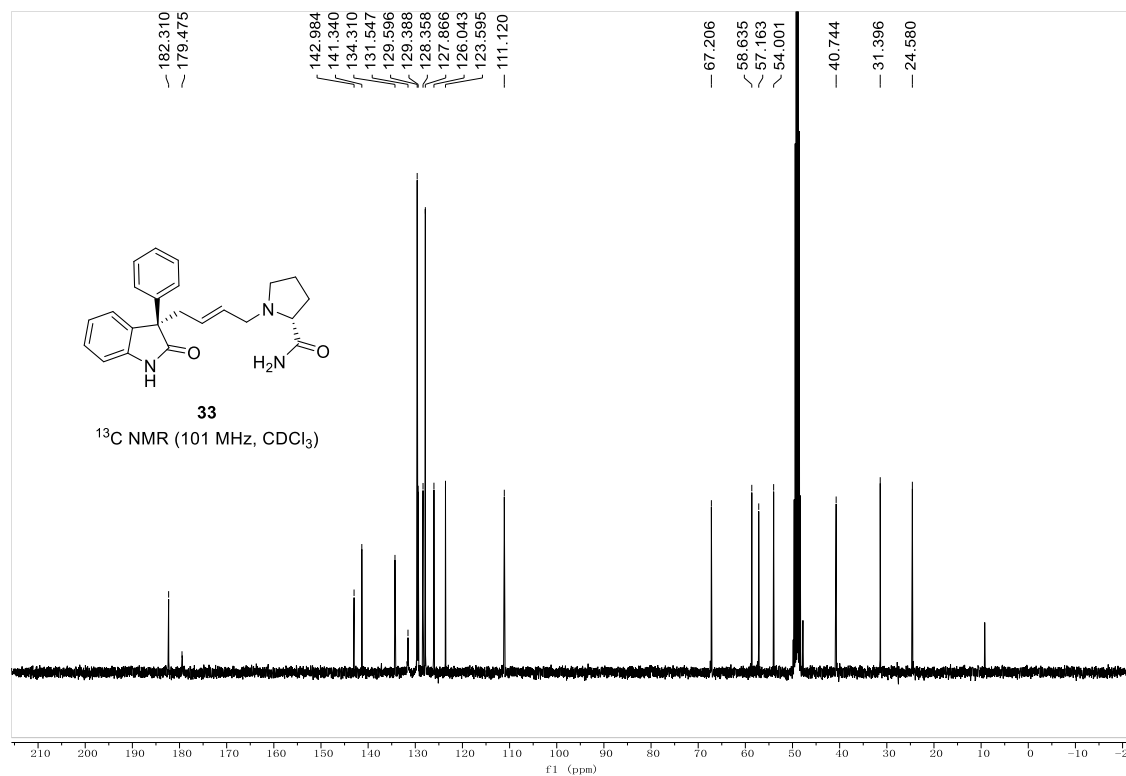

**(1*R*,5*S*)-3-((*E*)-4-((*R*)-2-oxo-3-Phenylindolin-3-yl)but-2-en-1-yl)-1,2,3,4,5,6-hexahydro-8H-1,5-methanopyrido[1,2-a][1,5]diazocin-8-one (34)**

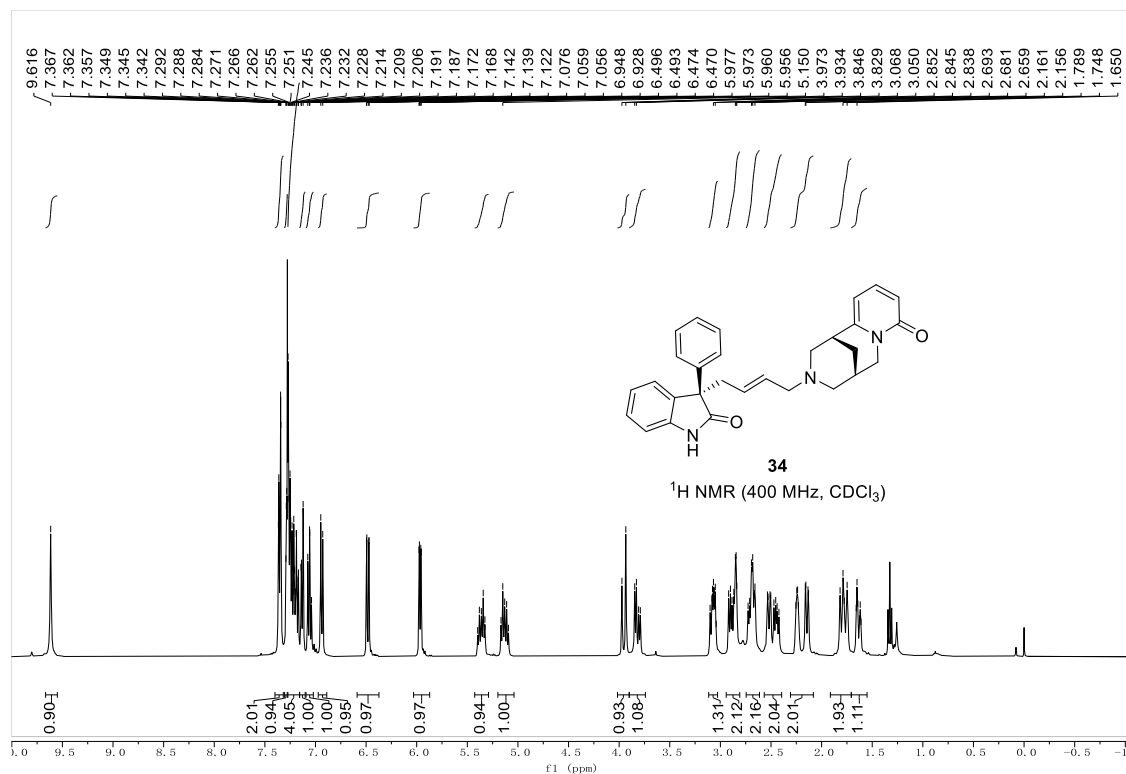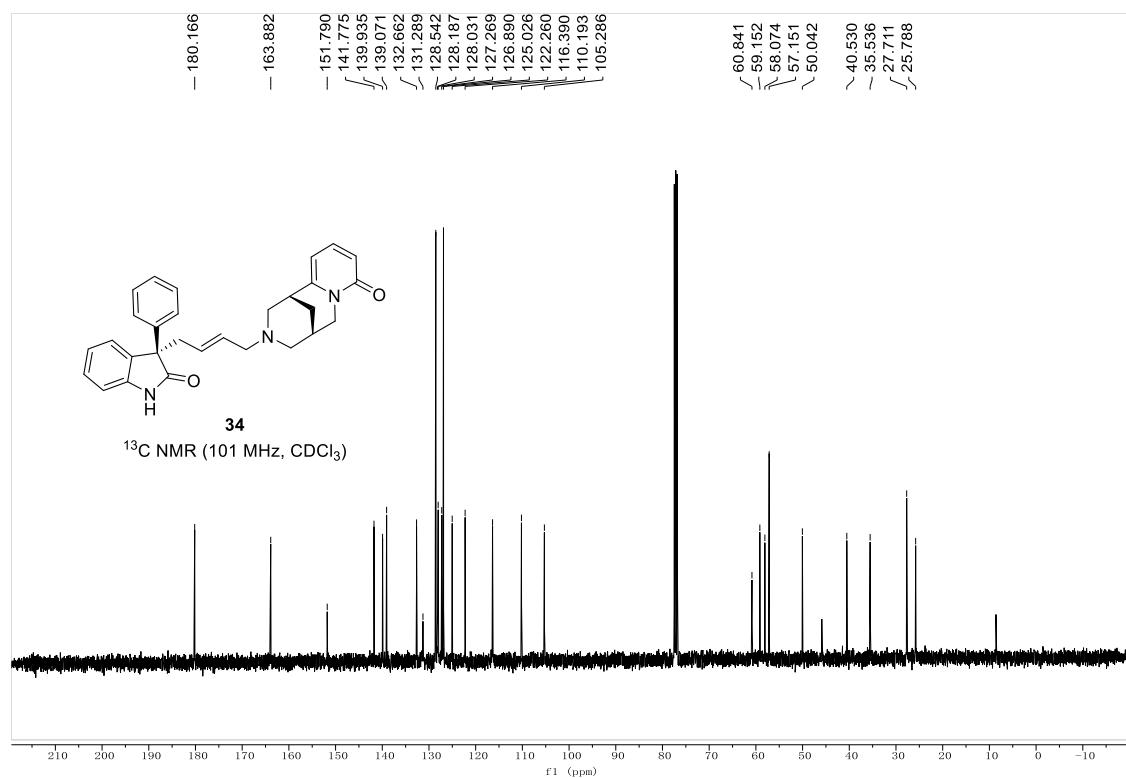

## 8. HPLC analysis

### *tert*-Butyl (*R*, *E*)-3-(4-hydroxybut-2-en-1-yl)-2-oxo-3-phenylindoline-1-carboxylate (1)

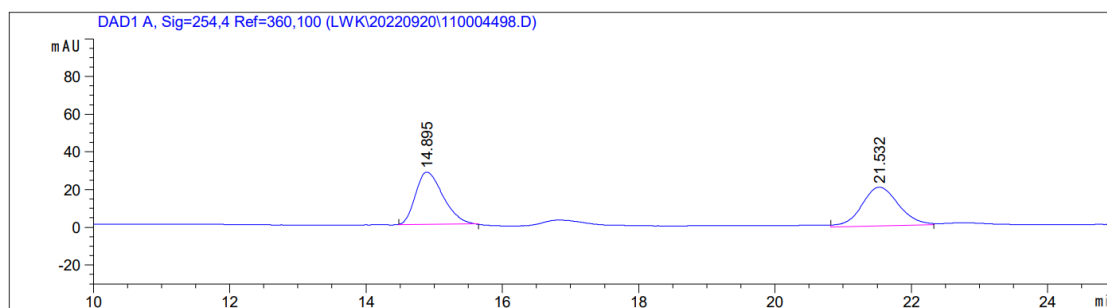

| Peak # | RetTime [min] | Type | Width [min] | Area [mAU*s] | Height [mAU] | Area %  |
|--------|---------------|------|-------------|--------------|--------------|---------|
| 1      | 14.895        | MM R | 0.4683      | 780.19434    | 27.76660     | 50.0184 |
| 2      | 21.532        | MM R | 0.6304      | 779.62061    | 20.61099     | 49.9816 |

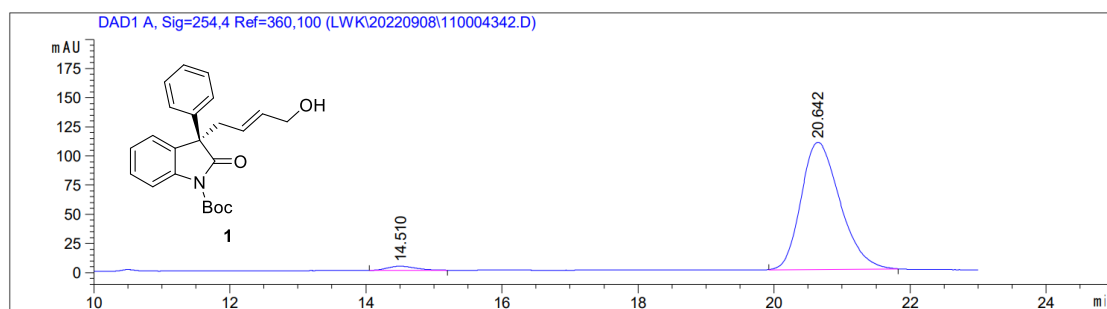

| Peak # | RetTime [min] | Type | Width [min] | Area [mAU*s] | Height [mAU] | Area %  |
|--------|---------------|------|-------------|--------------|--------------|---------|
| 1      | 14.510        | BB   | 0.3667      | 103.79066    | 3.55447      | 2.3287  |
| 2      | 20.642        | BB   | 0.6132      | 4353.22461   | 109.16947    | 97.6713 |

### *tert*-Butyl (*R*, *E*)-3-(4-hydroxybut-2-en-1-yl)-3-(3-methoxyphenyl)-2-oxoindoline-1-carboxylate (2)

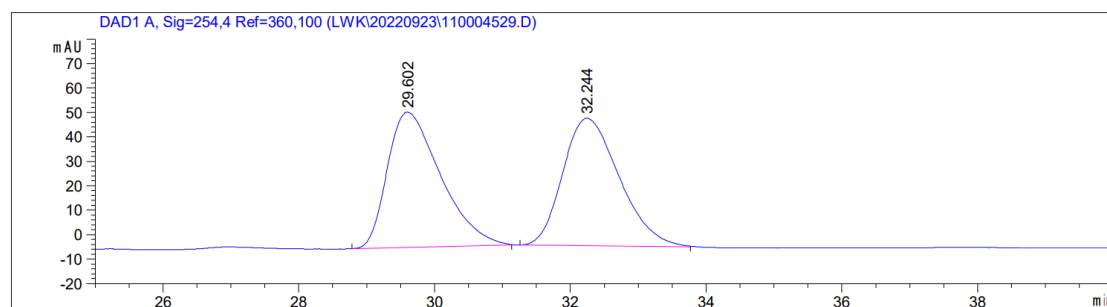

| Peak # | RetTime [min] | Type | Width [min] | Area [mAU*s] | Height [mAU] | Area %  |
|--------|---------------|------|-------------|--------------|--------------|---------|
| 1      | 29.602        | BB   | 0.7814      | 3013.53955   | 55.33070     | 50.0347 |
| 2      | 32.244        | BB   | 0.8873      | 3009.35913   | 52.14118     | 49.9653 |

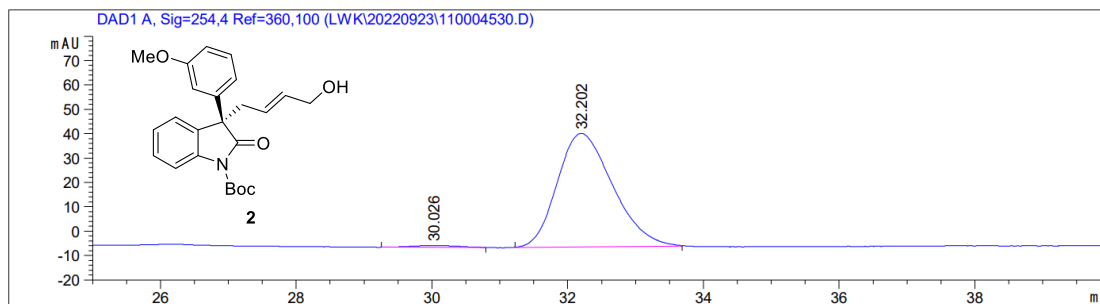

| Peak # | RetTime [min] | Type | Width [min] | Area [mAU*s] | Height [mAU] | Area %  |
|--------|---------------|------|-------------|--------------|--------------|---------|
| 1      | 30.026        | MM R | 0.7985      | 37.65936     | 7.86027e-1   | 1.4018  |
| 2      | 32.202        | BB   | 0.8147      | 2648.83350   | 46.63419     | 98.5982 |

**tert-Butyl (R,E)-3-(4-hydroxybut-2-en-1-yl)-2-oxo-3-(m-tolyl)indoline-1-carboxylate (3)**

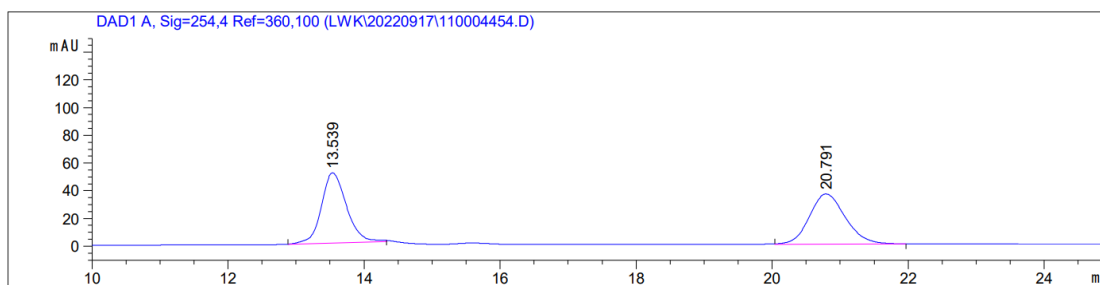

| Peak # | RetTime [min] | Type | Width [min] | Area [mAU*s] | Height [mAU] | Area %  |
|--------|---------------|------|-------------|--------------|--------------|---------|
| 1      | 13.539        | MM R | 0.4312      | 1313.61157   | 50.77024     | 49.6791 |
| 2      | 20.791        | BB   | 0.5652      | 1330.58252   | 36.17081     | 50.3209 |

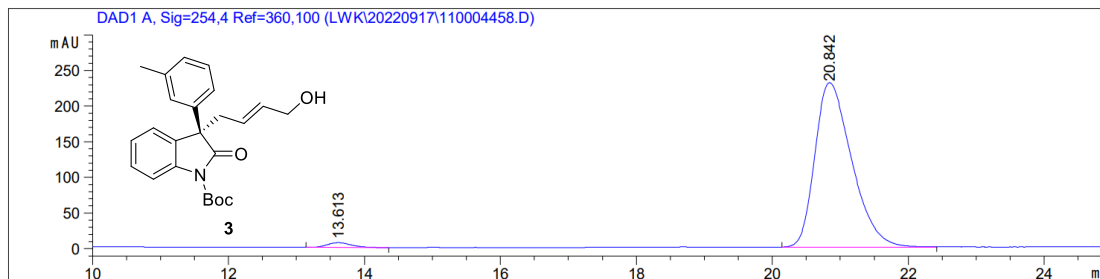

| Peak # | RetTime [min] | Type | Width [min] | Area [mAU*s] | Height [mAU] | Area %  |
|--------|---------------|------|-------------|--------------|--------------|---------|
| 1      | 13.613        | BB   | 0.3798      | 167.36639    | 6.69130      | 1.8940  |
| 2      | 20.842        | BB   | 0.5787      | 8669.28613   | 230.53284    | 98.1060 |

***tert*-Butyl (*R,E*)-3-(3-fluorophenyl)-3-(4-hydroxybut-2-en-1-yl)-2-oxoindoline-1-carboxylate**

(4)

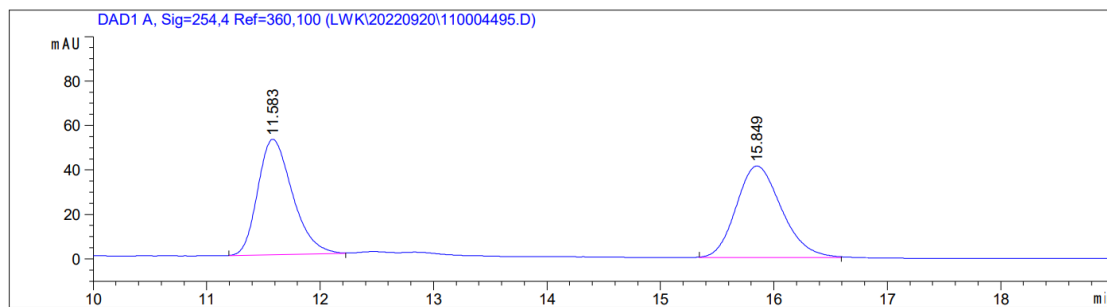

| Peak # | RetTime [min] | Type | Width [min] | Area [mAU*s] | Height [mAU] | Area %  |
|--------|---------------|------|-------------|--------------|--------------|---------|
| 1      | 11.583        | BB   | 0.3277      | 1102.70447   | 51.93147     | 49.2107 |
| 2      | 15.849        | BB   | 0.4267      | 1138.07703   | 41.14437     | 50.7893 |

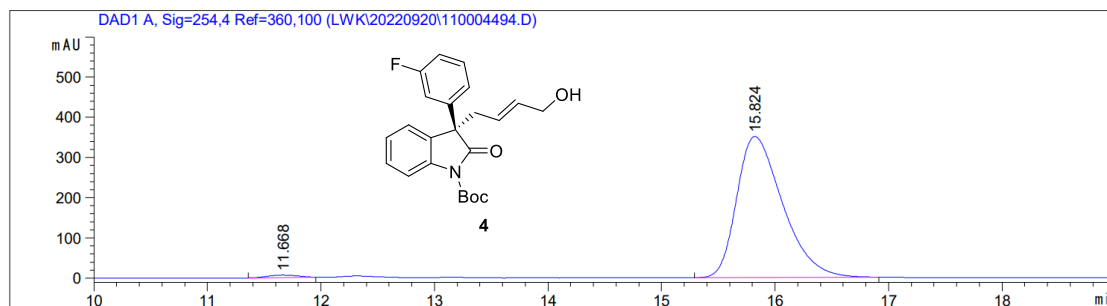

| Peak # | RetTime [min] | Type | Width [min] | Area [mAU*s] | Height [mAU] | Area %  |
|--------|---------------|------|-------------|--------------|--------------|---------|
| 1      | 11.668        | MM R | 0.3201      | 123.88526    | 6.44950      | 1.2365  |
| 2      | 15.824        | BB   | 0.4307      | 9895.20020   | 351.17252    | 98.7635 |

***tert*-Butyl (*R, E*)-3-(3-chlorophenyl)-3-(4-hydroxybut-2-en-1-yl)-2-oxindoline-1-carboxylate**

(5)

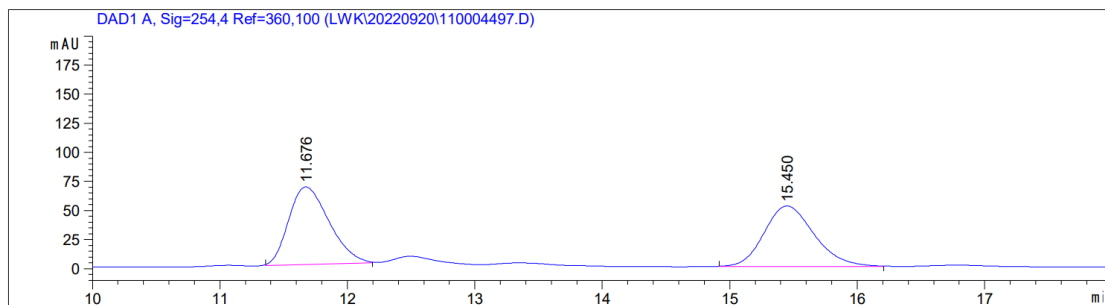

| Peak # | RetTime [min] | Type | Width [min] | Area [mAU*s] | Height [mAU] | Area %  |
|--------|---------------|------|-------------|--------------|--------------|---------|
| 1      | 11.676        | MM R | 0.3673      | 1472.84558   | 66.82629     | 50.8806 |
| 2      | 15.450        | BB   | 0.4209      | 1421.86670   | 52.02248     | 49.1194 |

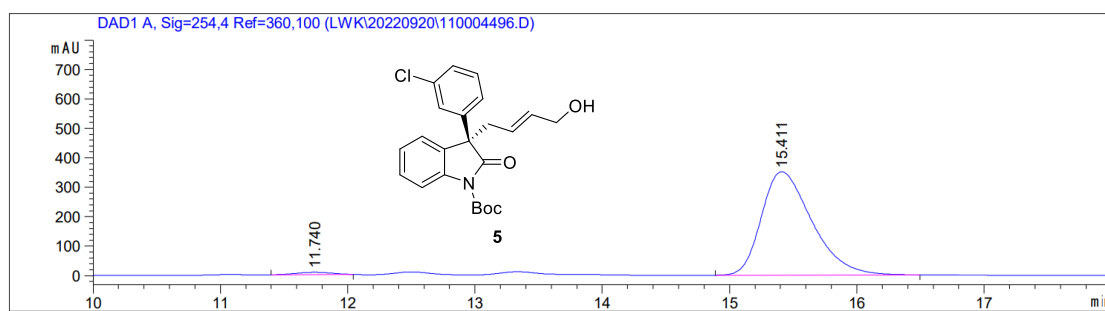

| Peak # | RetTime [min] | Type | Width [min] | Area [mAU*s] | Height [mAU] | Area %  |
|--------|---------------|------|-------------|--------------|--------------|---------|
| 1      | 11.740        | MM R | 0.3455      | 172.91733    | 8.34221      | 1.7552  |
| 2      | 15.411        | BB   | 0.4235      | 9678.58008   | 351.23306    | 98.2448 |

***tert*-Butyl (*R, E*)-3-(4-(dimethylamino)phenyl)-3-(4-hydroxybut-2-en-1-yl)-2-oxindoline-1-carboxylate (6)**

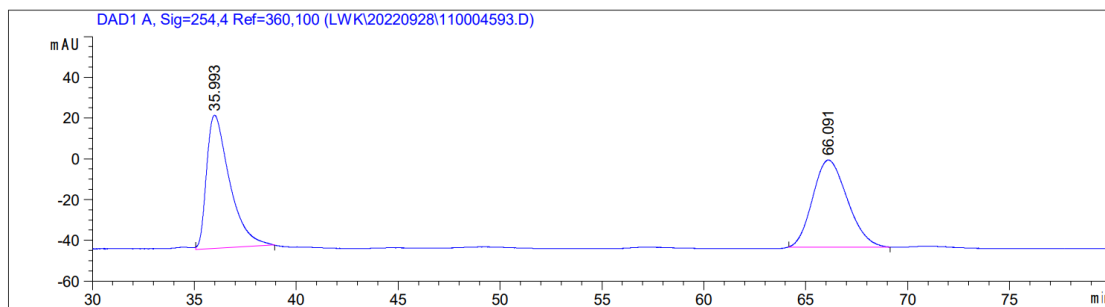



| Peak # | RetTime [min] | Type | Width [min] | Area [mAU*s] | Height [mAU] | Area %  |
|--------|---------------|------|-------------|--------------|--------------|---------|
| 1      | 35.993        | MM R | 1.3071      | 5122.06641   | 65.30984     | 50.3548 |
| 2      | 66.091        | BB   | 1.3978      | 5049.89209   | 42.75983     | 49.6452 |

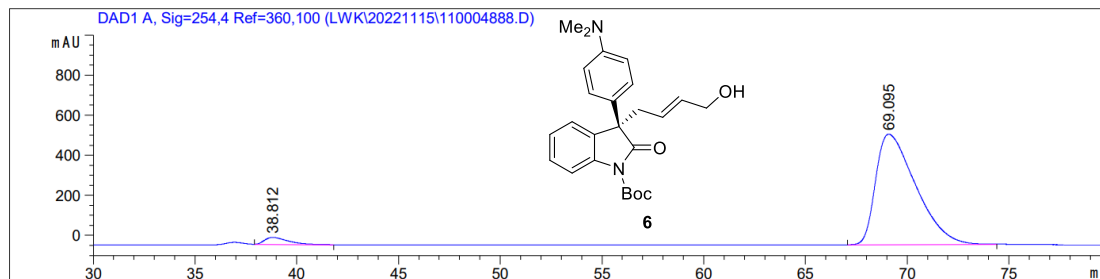

| Peak # | RetTime [min] | Type | Width [min] | Area [mAU*s] | Height [mAU] | Area %  |
|--------|---------------|------|-------------|--------------|--------------|---------|
| 1      | 38.812        | MM R | 1.3840      | 2963.70679   | 35.68980     | 3.7736  |
| 2      | 69.095        | BB   | 2.0381      | 7.55735e4    | 551.70789    | 96.2264 |

**tert-Butyl (R, E)-3-(4-hydroxybut-2-en-1-yl)-3-(4-methoxyphenyl)-2-oxindoline-1-carboxylate (7)**

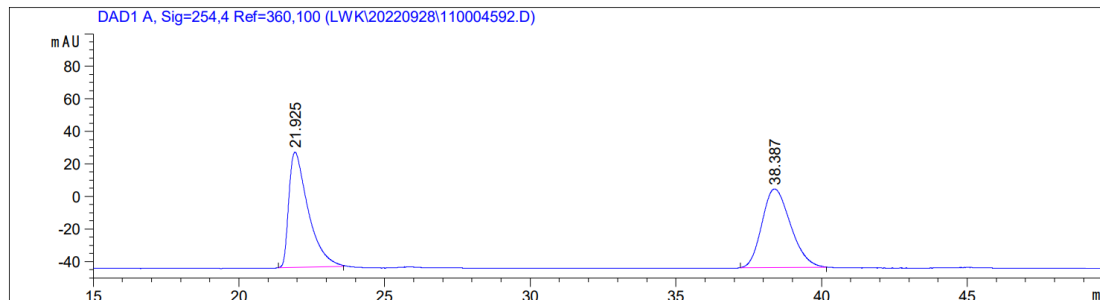

| Peak # | RetTime [min] | Type | Width [min] | Area [mAU*s] | Height [mAU] | Area %  |
|--------|---------------|------|-------------|--------------|--------------|---------|
| 1      | 21.925        | BB   | 0.6740      | 3268.88550   | 70.88786     | 49.6715 |
| 2      | 38.387        | BB   | 0.9189      | 3312.12524   | 48.36847     | 50.3285 |

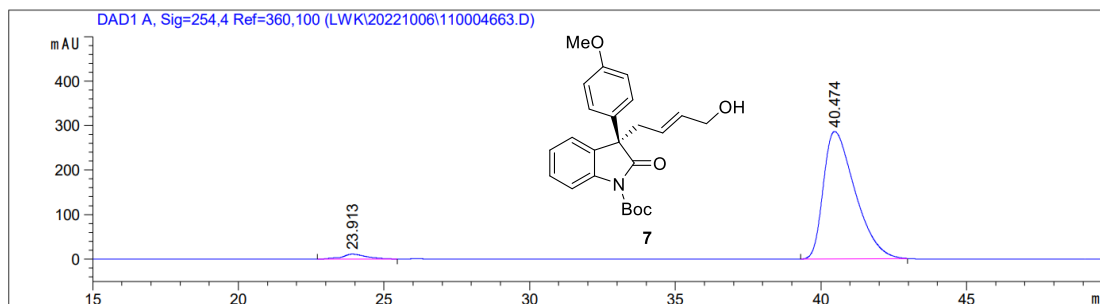

| Peak # | RetTime [min] | Type | Width [min] | Area [mAU*s] | Height [mAU] | Area %  |
|--------|---------------|------|-------------|--------------|--------------|---------|
| 1      | 23.913        | MM R | 0.9764      | 655.69263    | 11.19182     | 2.9290  |
| 2      | 40.474        | BB   | 1.1346      | 2.17308e4    | 286.58707    | 97.0710 |

***tert*-Butyl (*R,E*)-3-(4-hydroxybut-2-en-1-yl)-2-oxo-3-(*p*-tolyl)indoline-1-carboxylate (8)**

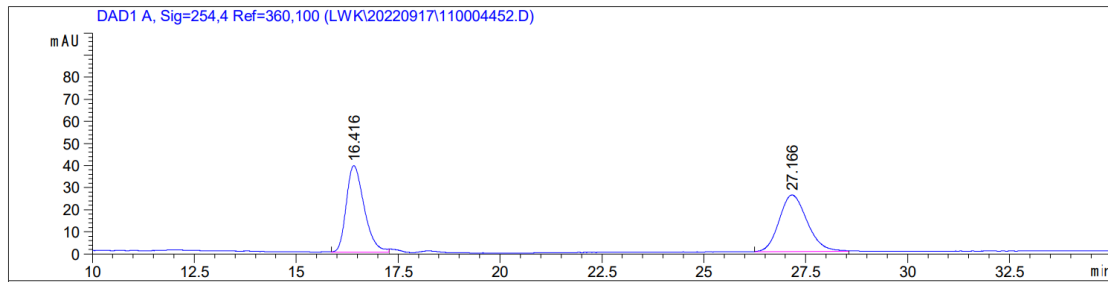

| Peak # | RetTime [min] | Type | Width [min] | Area [mAU*s] | Height [mAU] | Area %  |
|--------|---------------|------|-------------|--------------|--------------|---------|
| 1      | 16.416        | BB   | 0.4705      | 1197.18958   | 39.17538     | 49.5560 |
| 2      | 27.166        | BB   | 0.7230      | 1218.64172   | 25.61898     | 50.4440 |

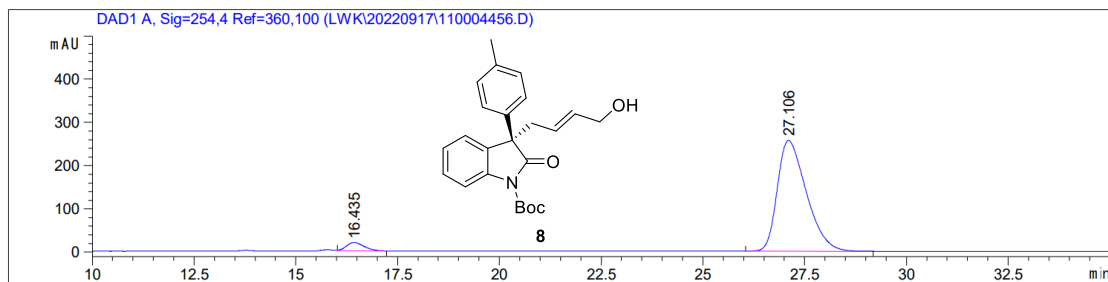

| Peak # | RetTime [min] | Type | Width [min] | Area [mAU*s] | Height [mAU] | Area %  |
|--------|---------------|------|-------------|--------------|--------------|---------|
| 1      | 16.435        | MM R | 0.5015      | 563.34393    | 18.72179     | 4.2432  |
| 2      | 27.106        | BB   | 0.7713      | 1.27131e4    | 256.04669    | 95.7568 |

***tert*-Butyl (*R,E*)-3-(4-ethylphenyl)-3-(4-hydroxybut-2-en-1-yl)-2-oxindoline-1-carboxylate (9)**

(9)

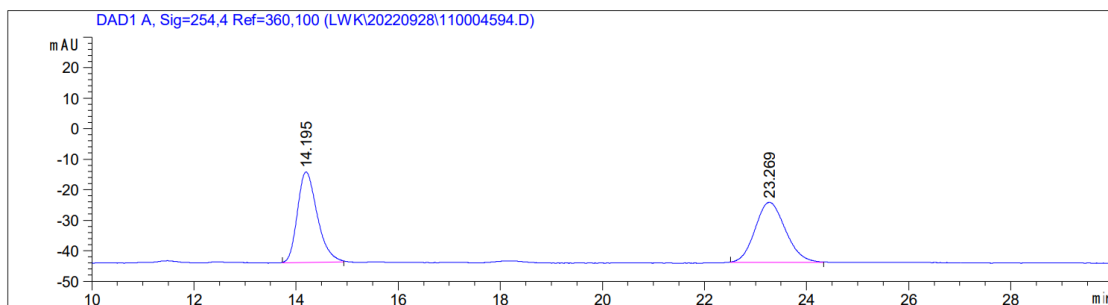

| Peak # | RetTime [min] | Type | Width [min] | Area [mAU*s] | Height [mAU] | Area %  |
|--------|---------------|------|-------------|--------------|--------------|---------|
| 1      | 14.195        | BB   | 0.4134      | 801.40765    | 29.64263     | 49.8467 |
| 2      | 23.269        | BB   | 0.6231      | 806.33807    | 19.63576     | 50.1533 |

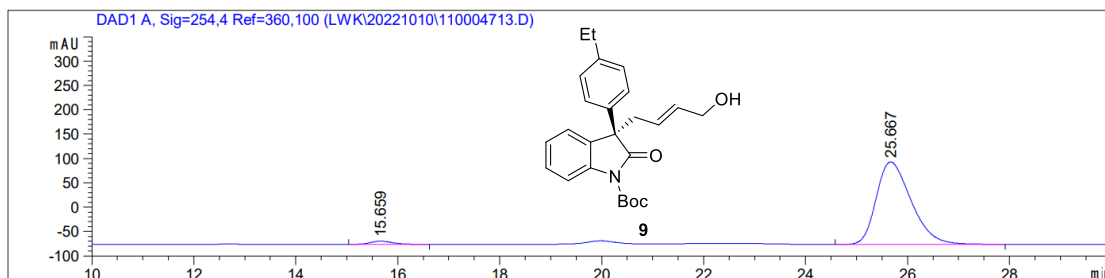

| Peak # | RetTime [min] | Type | Width [min] | Area [mAU*s] | Height [mAU] | Area %  |
|--------|---------------|------|-------------|--------------|--------------|---------|
| 1      | 15.659        | BB   | 0.4692      | 204.82936    | 6.68925      | 2.4759  |
| 2      | 25.667        | VB   | 0.7397      | 8068.17969   | 169.37366    | 97.5241 |

**tert-Butyl (R, E)-3-(4-(tert-butyl)phenyl)-3-(4-hydroxybut-2-en-1-yl)-2-oxindoline-1-carboxylate (10)**

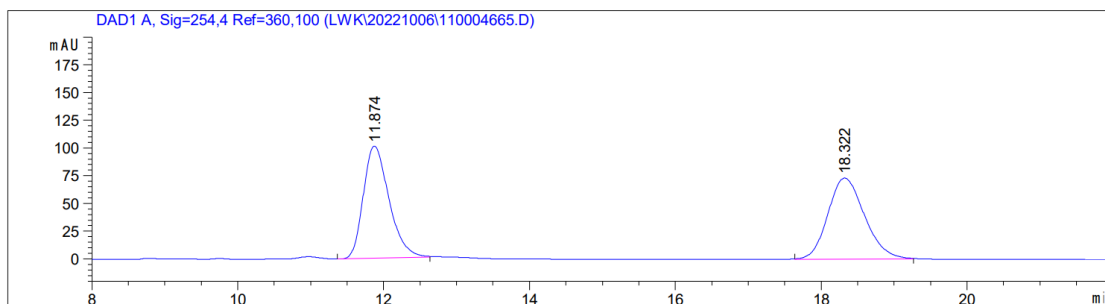

| Peak # | RetTime [min] | Type | Width [min] | Area [mAU*s] | Height [mAU] | Area %  |
|--------|---------------|------|-------------|--------------|--------------|---------|
| 1      | 11.874        | VB   | 0.3776      | 2474.49072   | 101.06794    | 49.2457 |
| 2      | 18.322        | BB   | 0.5411      | 2550.29883   | 73.08298     | 50.7543 |

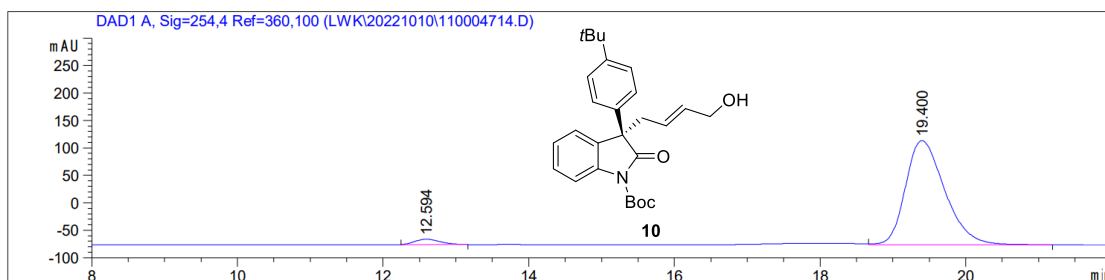

| Peak # | RetTime [min] | Type | Width [min] | Area [mAU*s] | Height [mAU] | Area %  |
|--------|---------------|------|-------------|--------------|--------------|---------|
| 1      | 12.594        | MM R | 0.3977      | 234.43657    | 9.82387      | 3.1935  |
| 2      | 19.400        | VB   | 0.5763      | 7106.68164   | 190.03984    | 96.8065 |

***tert*-Butyl (*R*, *E*)-3-([1,1'-biphenyl]-4-yl)-3-(4-hydroxybut-2-en-1-yl)-2-oxindoline-1-carboxylate (11)**

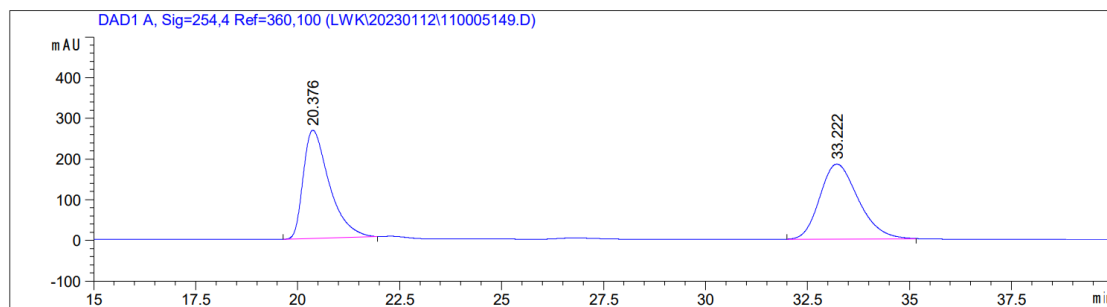

| Peak # | RetTime [min] | Type | Width [min] | Area [mAU*s] | Height [mAU] | Area %  |
|--------|---------------|------|-------------|--------------|--------------|---------|
| 1      | 20.376        | BB   | 0.6713      | 1.18087e4    | 266.32895    | 49.3622 |
| 2      | 33.222        | BB   | 1.0042      | 1.21138e4    | 184.45320    | 50.6378 |

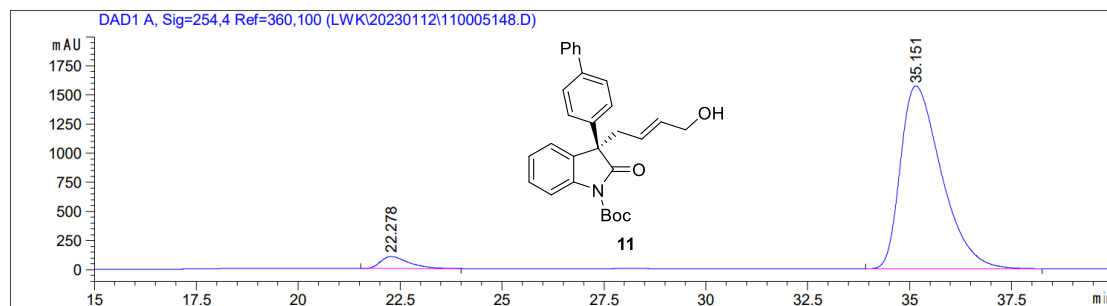

| Peak # | RetTime [min] | Type | Width [min] | Area [mAU*s] | Height [mAU] | Area %  |
|--------|---------------|------|-------------|--------------|--------------|---------|
| 1      | 22.278        | BB   | 0.7283      | 5040.01416   | 103.84022    | 4.3771  |
| 2      | 35.151        | BB   | 1.0671      | 1.10106e5    | 1572.04419   | 95.6229 |

***tert*-Butyl (*R*, *E*)-3-(4-fluorophenyl)-3-(4-hydroxybut-2-en-1-yl)-2-oxindoline-1-carboxylate**

(12)

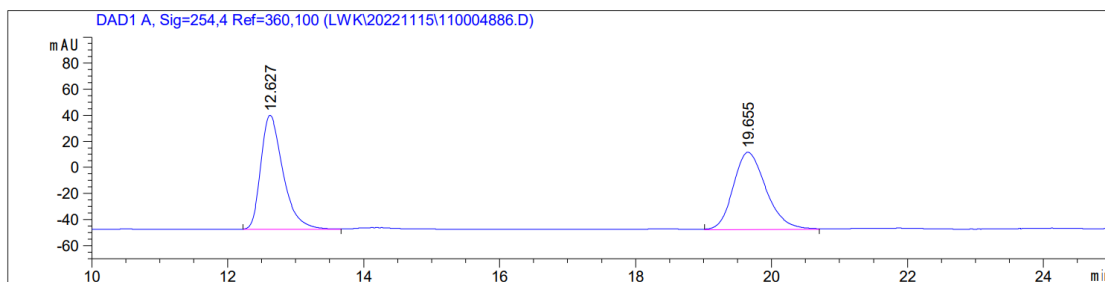

| Peak # | RetTime [min] | Type | Width [min] | Area [mAU*s] | Height [mAU] | Area %  |
|--------|---------------|------|-------------|--------------|--------------|---------|
| 1      | 12.627        | BV   | 0.3539      | 1994.52429   | 87.52332     | 50.0122 |
| 2      | 19.655        | MM R | 0.5586      | 1993.55408   | 59.48217     | 49.9878 |

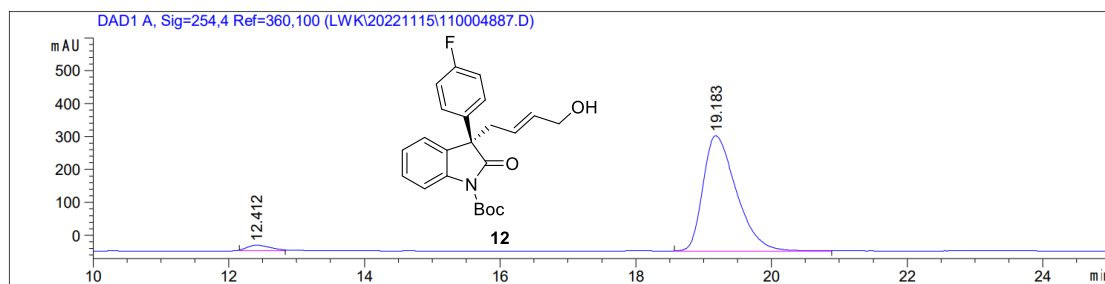

| Peak # | RetTime [min] | Type | Width [min] | Area [mAU*s] | Height [mAU] | Area %  |
|--------|---------------|------|-------------|--------------|--------------|---------|
| 1      | 12.412        | MM R | 0.3989      | 414.87775    | 17.33274     | 3.3671  |
| 2      | 19.183        | BB   | 0.5257      | 1.19067e4    | 349.32394    | 96.6329 |

***tert*-Butyl (*R*, *E*)-3-(4-chlorophenyl)-3-(4-hydroxybut-2-en-1-yl)-2-oxindoline-1-carboxylate**

(13)

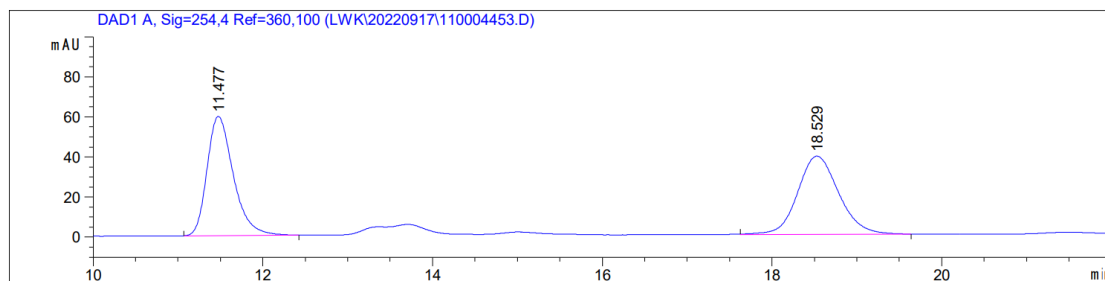

| Peak # | RetTime [min] | Type | Width [min] | Area [mAU*s] | Height [mAU] | Area %  |
|--------|---------------|------|-------------|--------------|--------------|---------|
| 1      | 11.477        | BB   | 0.3309      | 1280.63159   | 59.54227     | 49.2898 |
| 2      | 18.529        | BB   | 0.5176      | 1317.53552   | 39.05719     | 50.7102 |

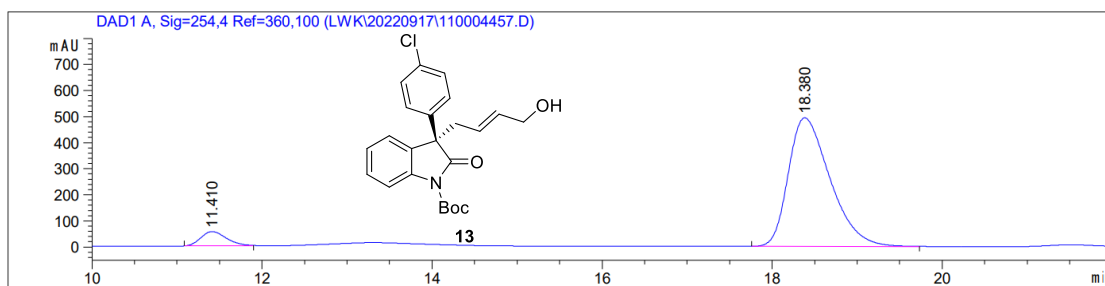

| Peak # | RetTime [min] | Type | Width [min] | Area [mAU*s] | Height [mAU] | Area %  |
|--------|---------------|------|-------------|--------------|--------------|---------|
| 1      | 11.410        | MM R | 0.3535      | 1169.61768   | 55.14174     | 6.4993  |
| 2      | 18.380        | BB   | 0.5242      | 1.68263e4    | 493.03995    | 93.5007 |

***tert*-Butyl (*R,E*)-3-(4-bromophenyl)-3-(4-hydroxybut-2-en-1-yl)-2-oxoindoline-1-carboxylate**

**(14)**

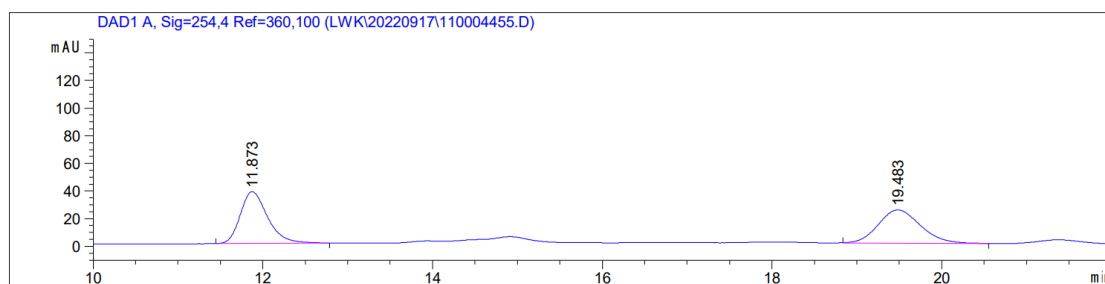

| Peak # | RetTime [min] | Type | Width [min] | Area [mAU*s] | Height [mAU] | Area %  |
|--------|---------------|------|-------------|--------------|--------------|---------|
| 1      | 11.873        | BB   | 0.3442      | 842.69434    | 37.49939     | 50.3521 |
| 2      | 19.483        | BB   | 0.5272      | 830.90820    | 24.04439     | 49.6479 |

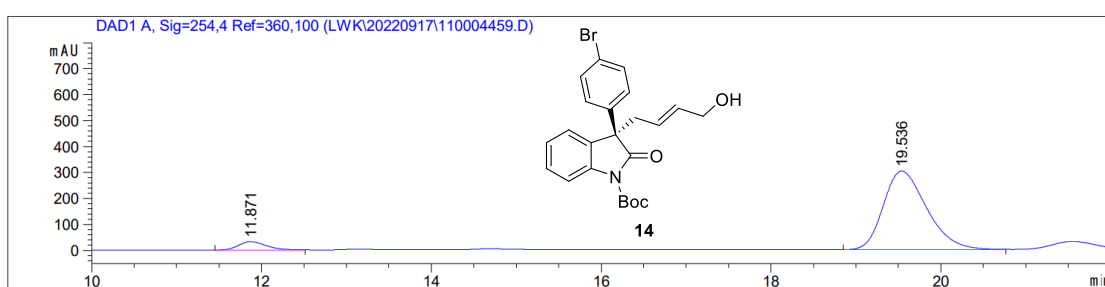

| Peak # | RetTime [min] | Type | Width [min] | Area [mAU*s] | Height [mAU] | Area %  |
|--------|---------------|------|-------------|--------------|--------------|---------|
| 1      | 11.871        | BB   | 0.3485      | 721.35590    | 32.05935     | 6.2863  |
| 2      | 19.536        | BB   | 0.5441      | 1.07537e4    | 302.94357    | 93.7137 |

***tert*-Butyl (*R*, *E*)-3-(3,5-dimethylphenyl)-3-(4-hydroxybut-2-en-1-yl)-2-oxindoline-1-carboxylate (15)**

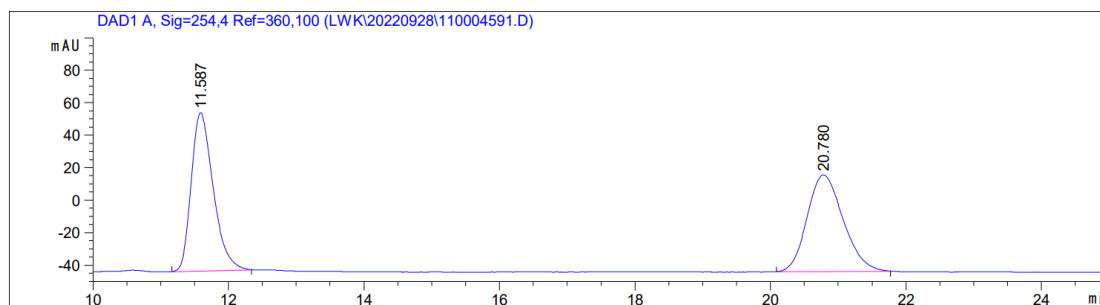

| Peak # | RetTime [min] | Type | Width [min] | Area [mAU*s] | Height [mAU] | Area %  |
|--------|---------------|------|-------------|--------------|--------------|---------|
| 1      | 11.587        | BB   | 0.3473      | 2202.50342   | 97.58189     | 49.9030 |
| 2      | 20.780        | BB   | 0.5685      | 2211.06226   | 59.64873     | 50.0970 |

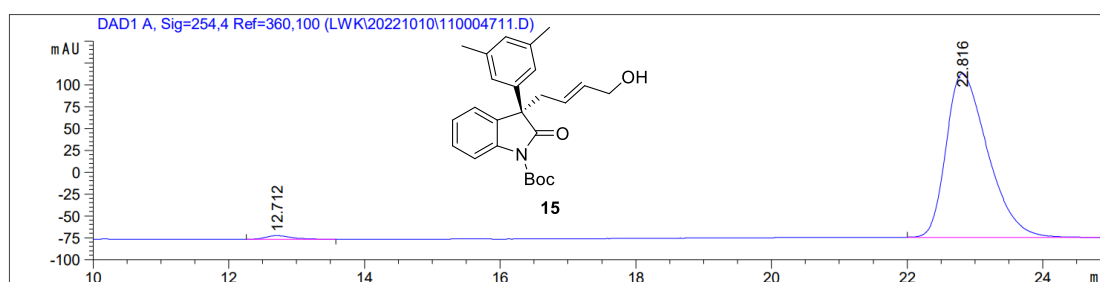

| Peak # | RetTime [min] | Type | Width [min] | Area [mAU*s] | Height [mAU] | Area %  |
|--------|---------------|------|-------------|--------------|--------------|---------|
| 1      | 12.712        | BB   | 0.4017      | 116.12218    | 4.26381      | 1.4352  |
| 2      | 22.816        | BB   | 0.6523      | 7975.15186   | 187.49161    | 98.5648 |

***tert*-Butyl (*R*, *E*)-3-(4-hydroxybut-2-en-1-yl)-3-(naphthalen-2-yl)-2-oxindoline-1-carboxylate (16)**

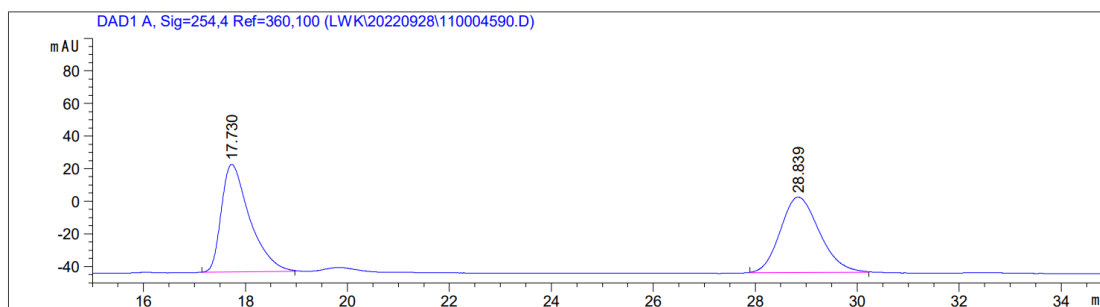

| Peak # | RetTime [min] | Type | Width [min] | Area [mAU*s] | Height [mAU] | Area %  |
|--------|---------------|------|-------------|--------------|--------------|---------|
| 1      | 17.730        | BB   | 0.5795      | 2547.16626   | 66.10419     | 50.7754 |
| 2      | 28.839        | BB   | 0.7936      | 2469.36816   | 46.34451     | 49.2246 |

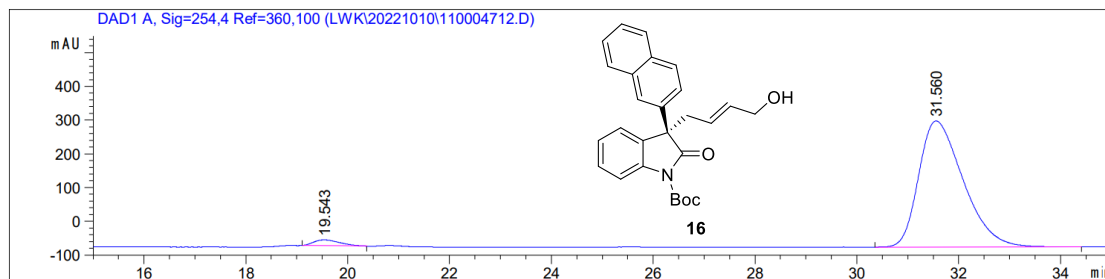

| Peak # | RetTime [min] | Type | Width [min] | Area [mAU*s] | Height [mAU] | Area %  |
|--------|---------------|------|-------------|--------------|--------------|---------|
| 1      | 19.543        | MM R | 0.5780      | 580.93353    | 16.75029     | 2.4965  |
| 2      | 31.560        | BB   | 0.9397      | 2.26887e4    | 374.03711    | 97.5035 |

**tert-Butyl (R, E)-3-(4-hydroxybut-2-en-1-yl)-5-methoxy-2-oxo-3-phenylindoline-1-carboxylate (17)**

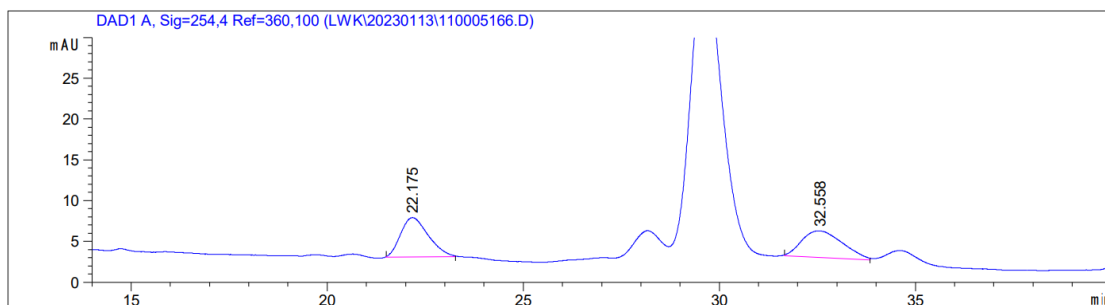

| Peak # | RetTime [min] | Type | Width [min] | Area [mAU*s] | Height [mAU] | Area %  |
|--------|---------------|------|-------------|--------------|--------------|---------|
| 1      | 22.175        | BB   | 0.6130      | 236.39684    | 4.81283      | 50.2273 |
| 2      | 32.558        | MM R | 1.2072      | 234.25708    | 3.23425      | 49.7727 |

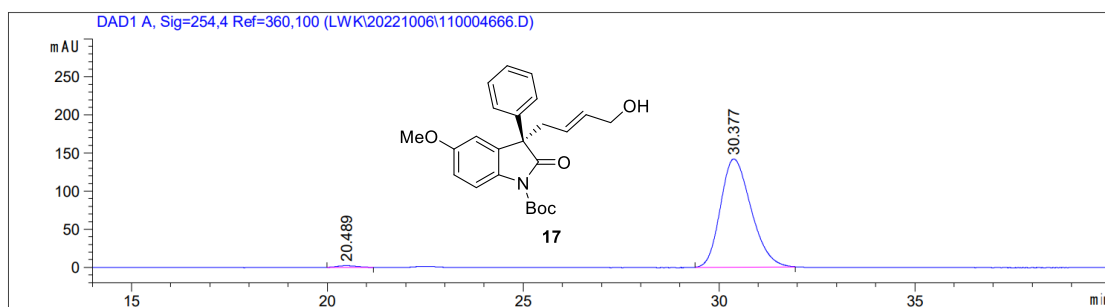



| Peak # | RetTime [min] | Type | Width [min] | Area [mAU*s] | Height [mAU] | Area %  |
|--------|---------------|------|-------------|--------------|--------------|---------|
| 1      | 20.489        | MM R | 0.5530      | 70.14021     | 2.11398      | 0.8956  |
| 2      | 30.377        | BB   | 0.8242      | 7761.71973   | 142.33061    | 99.1044 |

***tert*-Butyl (*R,E*)-3-(4-hydroxybut-2-en-1-yl)-5-methyl-2-oxo-3-phenylindoline-1-carboxylate (18)**

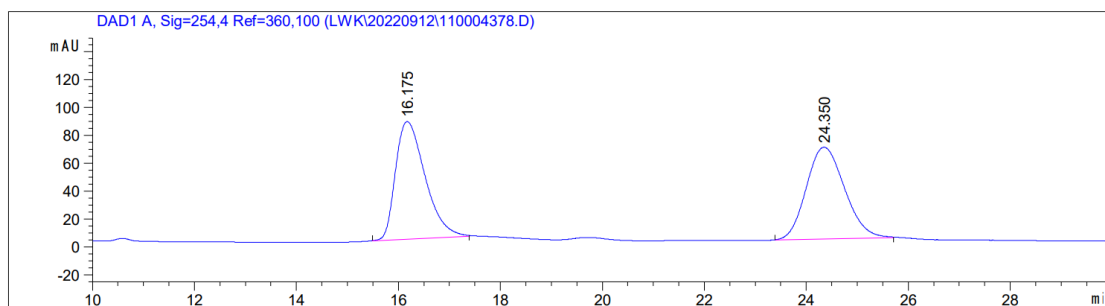

| Peak # | RetTime [min] | Type | Width [min] | Area [mAU*s] | Height [mAU] | Area %  |
|--------|---------------|------|-------------|--------------|--------------|---------|
| 1      | 16.175        | BB   | 0.6239      | 3402.19824   | 84.46485     | 49.7312 |
| 2      | 24.350        | BB   | 0.7920      | 3438.97754   | 65.98479     | 50.2688 |

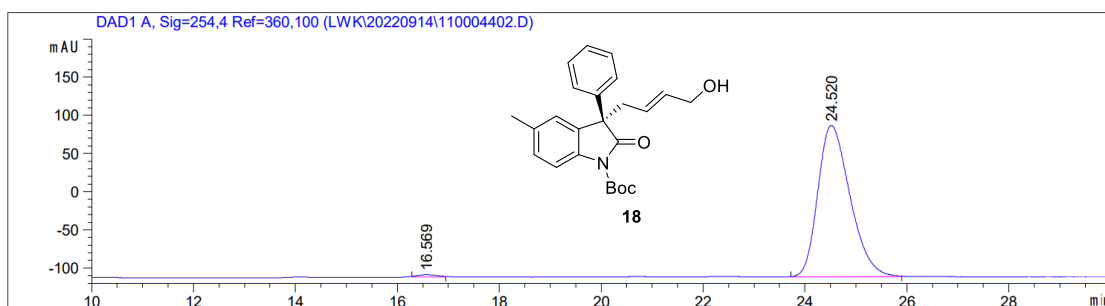

| Peak # | RetTime [min] | Type | Width [min] | Area [mAU*s] | Height [mAU] | Area %  |
|--------|---------------|------|-------------|--------------|--------------|---------|
| 1      | 16.569        | MM R | 0.4539      | 81.96997     | 3.01003      | 0.9360  |
| 2      | 24.520        | BB   | 0.6712      | 8675.39453   | 198.00359    | 99.0640 |

***tert*-Butyl (*R*, *E*)-5-fluoro-3-(4-hydroxybut-2-en-1-yl)-2-oxo-3-phenylindoline-1-carboxylate**

**(19)**

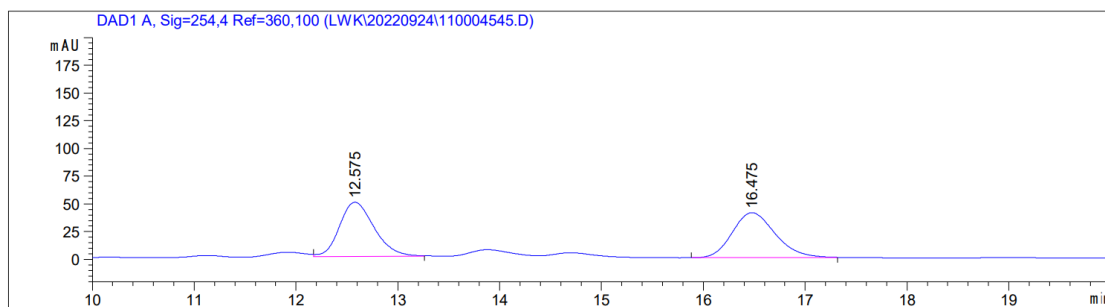

| Peak # | RetTime [min] | Type | Width [min] | Area [mAU*s] | Height [mAU] | Area %  |
|--------|---------------|------|-------------|--------------|--------------|---------|
| 1      | 12.575        | MM R | 0.3931      | 1150.50757   | 48.77592     | 49.2228 |
| 2      | 16.475        | MM R | 0.4882      | 1186.83862   | 40.51813     | 50.7772 |

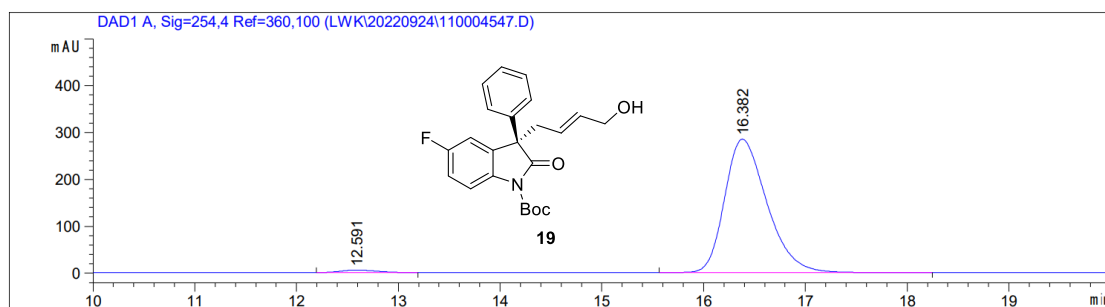

| Peak # | RetTime [min] | Type | Width [min] | Area [mAU*s] | Height [mAU] | Area %  |
|--------|---------------|------|-------------|--------------|--------------|---------|
| 1      | 12.591        | MM R | 0.4503      | 153.42296    | 5.67835      | 1.8274  |
| 2      | 16.382        | VB   | 0.4459      | 8242.42871   | 284.58130    | 98.1726 |

***tert*-Butyl (*R*, *E*)-5-chloro-3-(4-hydroxybut-2-en-1-yl)-2-oxo-3-phenylindoline-1-carboxylate**

**(20)**

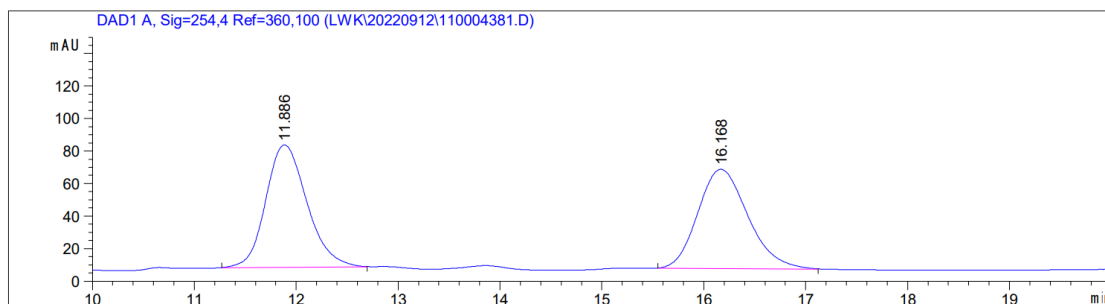

| Peak # | RetTime [min] | Type | Width [min] | Area [mAU*s] | Height [mAU] | Area %  |
|--------|---------------|------|-------------|--------------|--------------|---------|
| 1      | 11.886        | BB   | 0.4357      | 2120.04663   | 75.47655     | 50.2953 |
| 2      | 16.168        | BB   | 0.5196      | 2095.15356   | 61.16976     | 49.7047 |

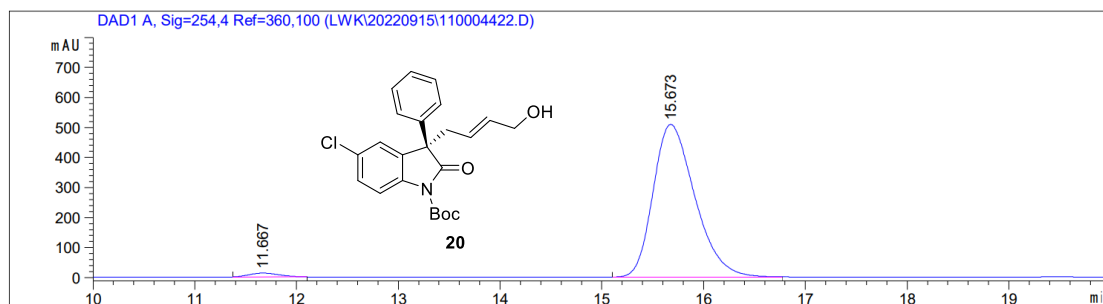

| Peak # | RetTime [min] | Type | Width [min] | Area [mAU*s] | Height [mAU] | Area %  |
|--------|---------------|------|-------------|--------------|--------------|---------|
| 1      | 11.667        | MM R | 0.3377      | 259.18661    | 12.79217     | 1.7593  |
| 2      | 15.673        | BB   | 0.4383      | 1.44732e4    | 508.11060    | 98.2407 |

**tert-Butyl (R,E)-5-bromo-3-(4-hydroxybut-2-en-1-yl)-2-oxo-3-phenylindoline-1-carboxylate**

**(21)**

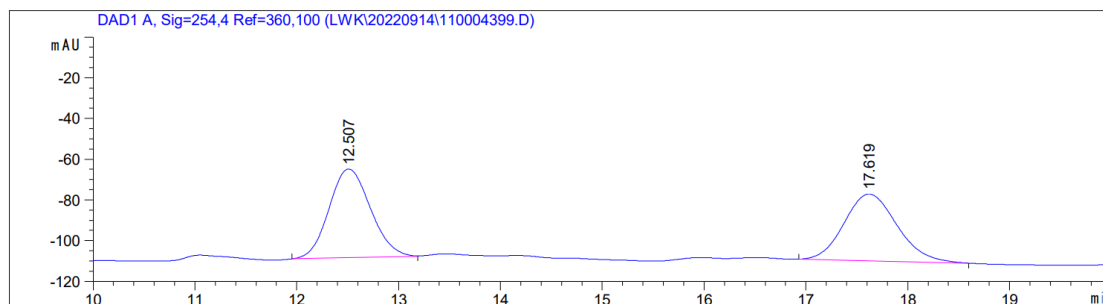

| Peak # | RetTime [min] | Type | Width [min] | Area [mAU*s] | Height [mAU] | Area %  |
|--------|---------------|------|-------------|--------------|--------------|---------|
| 1      | 12.507        | MM R | 0.4713      | 1232.44763   | 43.57935     | 50.7614 |
| 2      | 17.619        | BB   | 0.5697      | 1195.47559   | 32.92076     | 49.2386 |

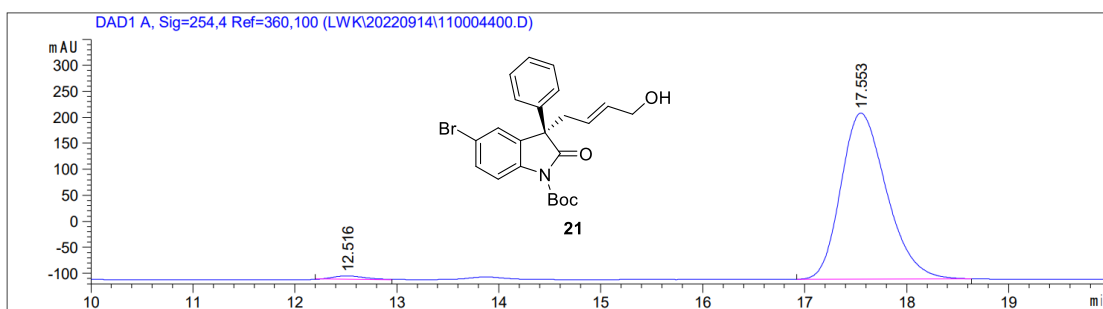

| Peak # | RetTime [min] | Type | Width [min] | Area [mAU*s] | Height [mAU] | Area %  |
|--------|---------------|------|-------------|--------------|--------------|---------|
| 1      | 12.516        | MM R | 0.3741      | 145.03342    | 6.46160      | 1.4346  |
| 2      | 17.553        | BB   | 0.4841      | 9964.30176   | 319.30762    | 98.5654 |

**tert-Butyl (R, E)-3-(4-hydroxybut-2-en-1-yl)-6-methoxy-2-oxo-3-phenylindoline-1-carboxylate (22)**

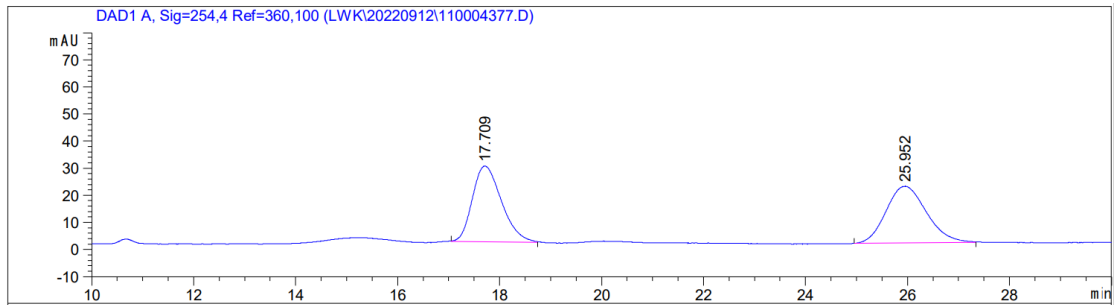

| Peak # | RetTime [min] | Type | Width [min] | Area [mAU*s] | Height [mAU] | Area %  |
|--------|---------------|------|-------------|--------------|--------------|---------|
| 1      | 17.709        | BB   | 0.6094      | 1109.43958   | 27.93438     | 49.1171 |
| 2      | 25.952        | BB   | 0.7612      | 1149.32312   | 20.91083     | 50.8829 |

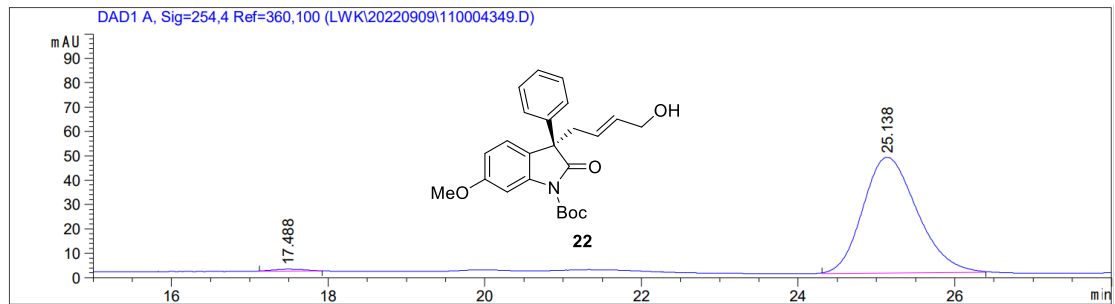

| Peak # | RetTime [min] | Type | Width [min] | Area [mAU*s] | Height [mAU] | Area %  |
|--------|---------------|------|-------------|--------------|--------------|---------|
| 1      | 17.488        | MM R | 0.4628      | 22.18959     | 7.99058e-1   | 0.9645  |
| 2      | 25.138        | BB   | 0.7200      | 2278.35889   | 47.46977     | 99.0355 |

**tert-Butyl (R, E)-6-fluoro-3-(4-hydroxybut-2-en-1-yl)-2-oxo-3-phenylindoline-1-carboxylate**

**(23)**

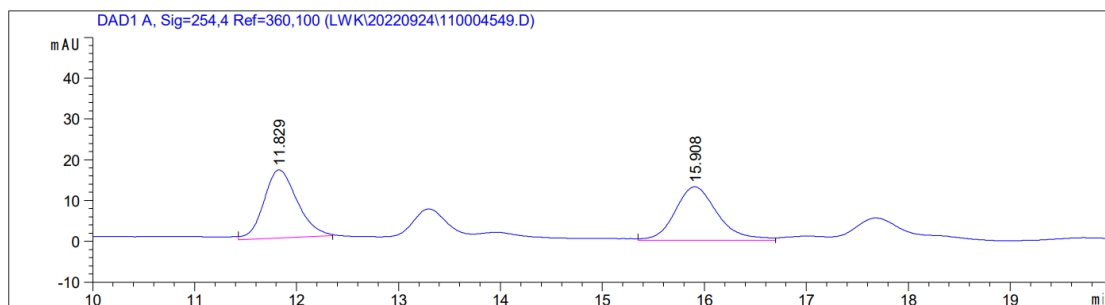

| Peak # | RetTime [min] | Type | Width [min] | Area [mAU*s] | Height [mAU] | Area %  |
|--------|---------------|------|-------------|--------------|--------------|---------|
| 1      | 11.829        | MM R | 0.3776      | 377.84961    | 16.67560     | 49.8883 |
| 2      | 15.908        | BV   | 0.4459      | 379.54111    | 13.10474     | 50.1117 |

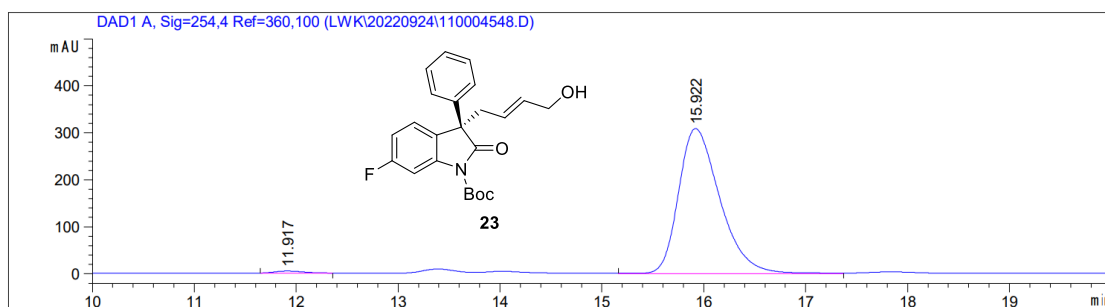

| Peak # | RetTime [min] | Type | Width [min] | Area [mAU*s] | Height [mAU] | Area %  |
|--------|---------------|------|-------------|--------------|--------------|---------|
| 1      | 11.917        | MM R | 0.3587      | 98.57403     | 4.57992      | 1.1144  |
| 2      | 15.922        | VV   | 0.4348      | 8746.79395   | 308.52325    | 98.8856 |

**tert-Butyl (R, E)-6-chloro-3-(4-hydroxybut-2-en-1-yl)-2-oxo-3-phenylindoline-1-carboxylate**

**(24)**

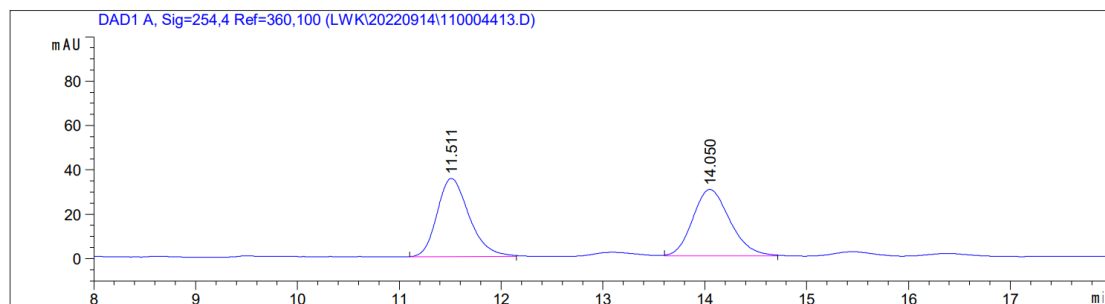

| Peak # | RetTime [min] | Type | Width [min] | Area [mAU*s] | Height [mAU] | Area %  |
|--------|---------------|------|-------------|--------------|--------------|---------|
| 1      | 11.511        | BB   | 0.3395      | 765.00372    | 35.20119     | 50.0446 |
| 2      | 14.050        | BB   | 0.3890      | 763.64130    | 29.99889     | 49.9554 |

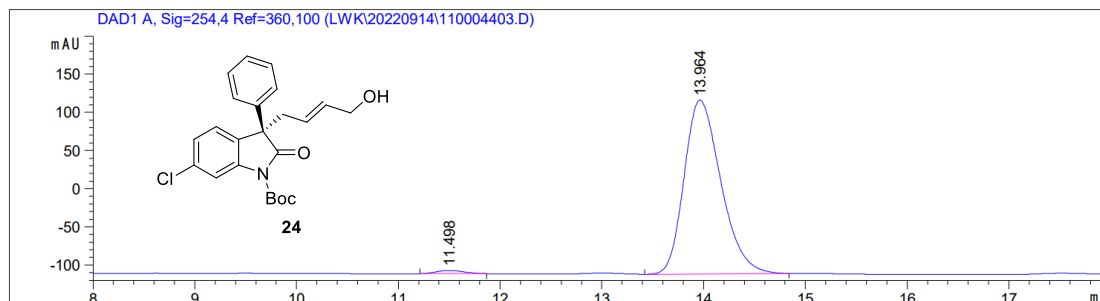

| Peak # | RetTime [min] | Type | Width [min] | Area [mAU*s] | Height [mAU] | Area %  |
|--------|---------------|------|-------------|--------------|--------------|---------|
| 1      | 11.498        | MM R | 0.2932      | 69.51347     | 3.95159      | 1.1996  |
| 2      | 13.964        | VB   | 0.3871      | 5725.16357   | 227.90720    | 98.8004 |

***tert*-Butyl (*R*, *E*)-6-bromo-3-(4-hydroxybut-2-en-1-yl)-2-oxo-3-phenylindoline-1-carboxylate (25)**

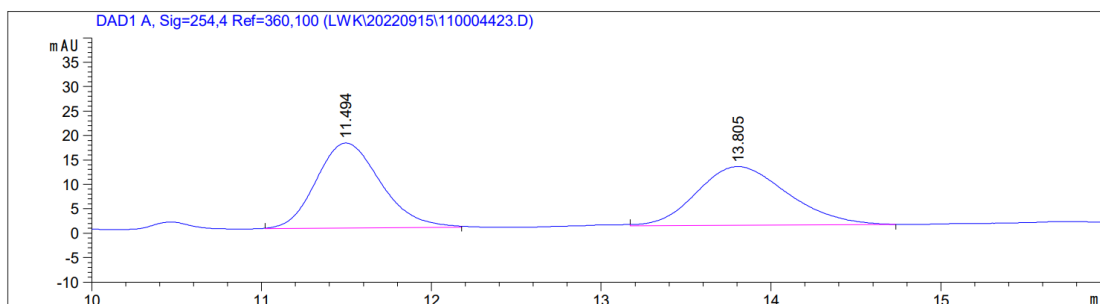

| Peak # | RetTime [min] | Type | Width [min] | Area [mAU*s] | Height [mAU] | Area %  |
|--------|---------------|------|-------------|--------------|--------------|---------|
| 1      | 11.494        | BB   | 0.4016      | 458.84186    | 17.40090     | 50.5119 |
| 2      | 13.805        | MM R | 0.6223      | 449.54120    | 12.03940     | 49.4881 |

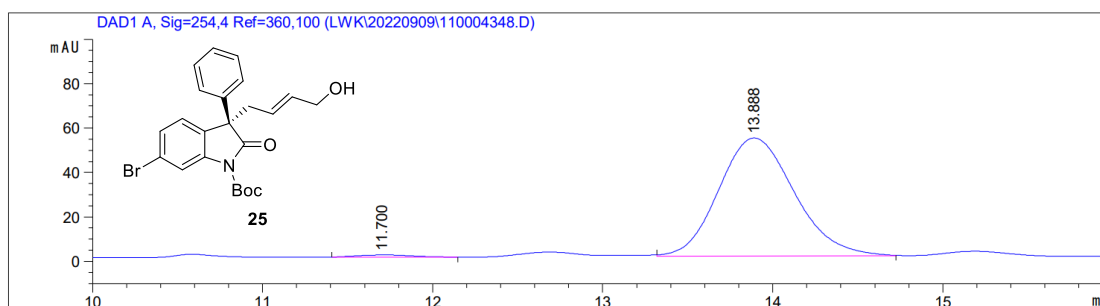

| Peak # | RetTime [min] | Type | Width [min] | Area [mAU*s] | Height [mAU] | Area %  |
|--------|---------------|------|-------------|--------------|--------------|---------|
| 1      | 11.700        | MM R | 0.3826      | 23.07956     | 1.00526      | 1.3820  |
| 2      | 13.888        | BB   | 0.4791      | 1646.87781   | 53.20132     | 98.6180 |

**(R, E)-4-(1-Methyl-3-phenylindolin-3-yl)but-2-en-1-ol (26)**

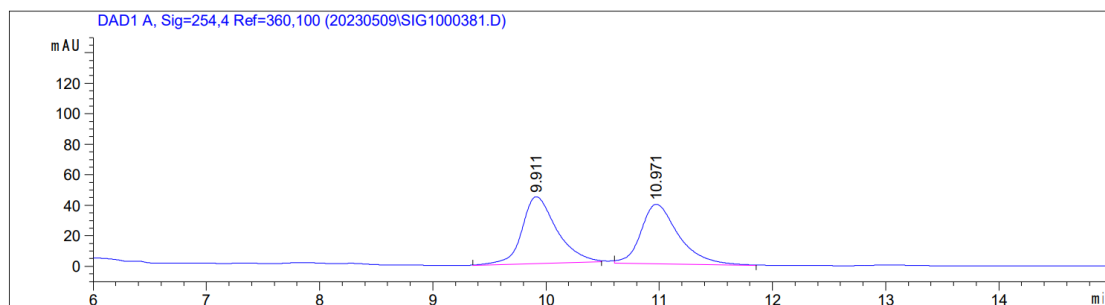

| Peak # | RetTime [min] | Type | Width [min] | Area [mAU*s] | Height [mAU] | Area %  |
|--------|---------------|------|-------------|--------------|--------------|---------|
| 1      | 9.911         | MM R | 0.3551      | 932.39752    | 43.76265     | 50.7345 |
| 2      | 10.971        | MM R | 0.3868      | 905.40149    | 39.01663     | 49.2655 |

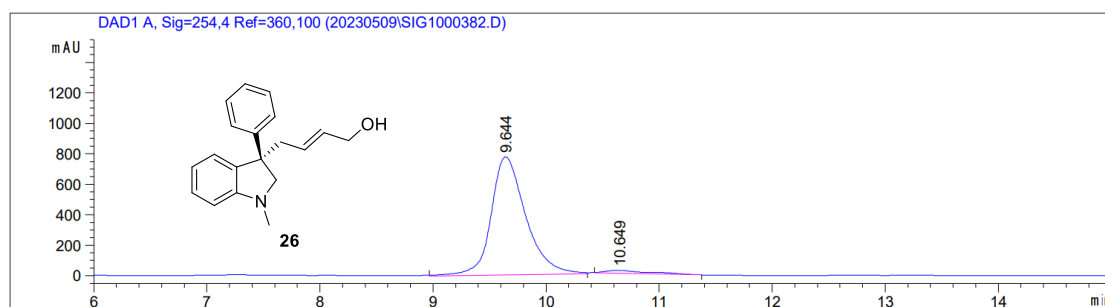

| Peak # | RetTime [min] | Type | Width [min] | Area [mAU*s] | Height [mAU] | Area %  |
|--------|---------------|------|-------------|--------------|--------------|---------|
| 1      | 9.644         | MM R | 0.3559      | 1.65594e4    | 775.51672    | 96.8637 |
| 2      | 10.649        | MM R | 0.4607      | 536.17450    | 19.39591     | 3.1363  |

**tert-Butyl (R)-3-(4-hydroxybutyl)-2-oxo-3-phenylindoline-1-carboxylate (27)**

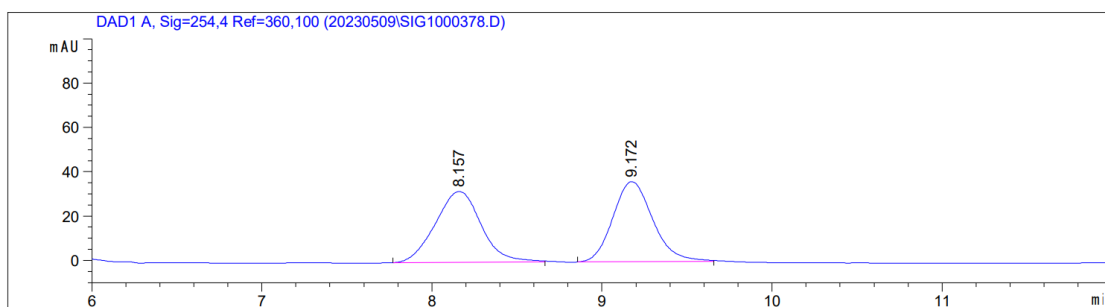





| Peak # | RetTime [min] | Type | Width [min] | Area [mAU*s] | Height [mAU] | Area %  |
|--------|---------------|------|-------------|--------------|--------------|---------|
| 1      | 12.247        | BB   | 0.3764      | 1.63843e4    | 667.46289    | 97.2138 |
| 2      | 17.416        | MM R | 0.5666      | 469.58798    | 13.81413     | 2.7862  |

**(R, E)-3-(4-Bromobut-2-en-1-yl)-3-phenylindolin-2-one (29)**

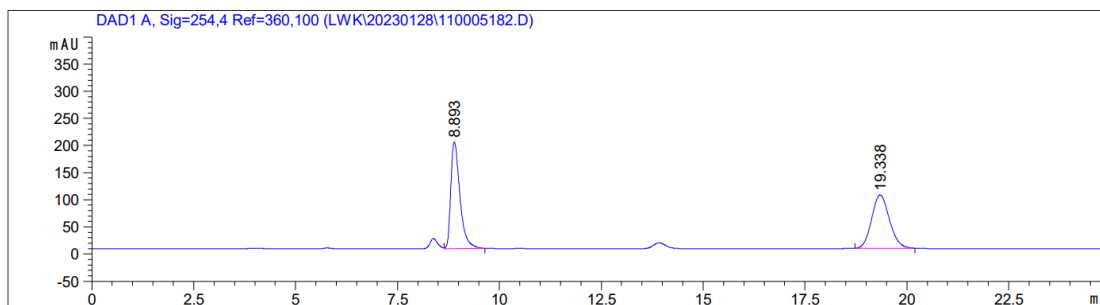

| Peak # | RetTime [min] | Type | Width [min] | Area [mAU*s] | Height [mAU] | Area %  |
|--------|---------------|------|-------------|--------------|--------------|---------|
| 1      | 8.893         | VB   | 0.2376      | 3055.99121   | 196.29881    | 50.4884 |
| 2      | 19.338        | BB   | 0.4685      | 2996.86157   | 98.61857     | 49.5116 |

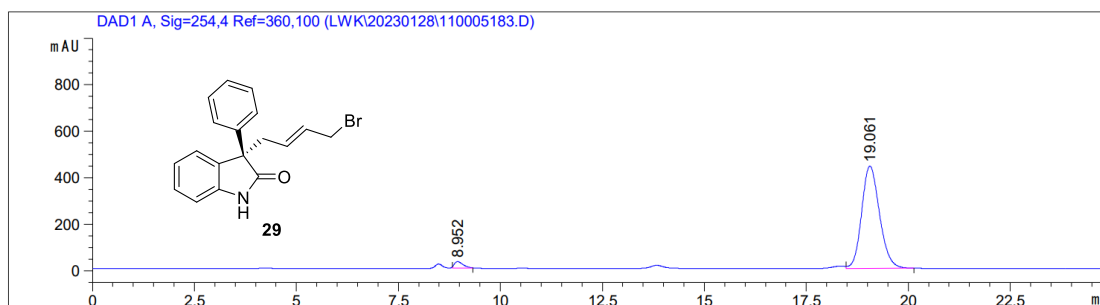

| Peak # | RetTime [min] | Type | Width [min] | Area [mAU*s] | Height [mAU] | Area %  |
|--------|---------------|------|-------------|--------------|--------------|---------|
| 1      | 8.952         | MM R | 0.2466      | 408.32028    | 27.59982     | 2.9560  |
| 2      | 19.061        | VB   | 0.4711      | 1.34048e4    | 440.37579    | 97.0440 |

**9. References**

- [1] J.-T. Xia and X.-P. Hu, Copper-Catalyzed Asymmetric Propargylic Alkylation with Oxindoles: Diastereo- and Enantioselective Construction of Vicinal Tertiary and All-Carbon Quaternary Stereocenters, *Org. Lett.* 2020, **22**, 1102.
- [2] S.-W. Duan, J. An, J.-R. Chen and W.-J. Xiao, Facile Synthesis of Enantioenriched C $\gamma$ -Tetrasubstituted  $\alpha$ -Amino Acid Derivatives via an Asymmetric Nucleophilic Addition/Protonation Cascade, *Org. Lett.* 2011, **13**, 2290.
